# Supplementary material for: Dynamic regulation of chromatin accessibility by pluripotency transcription factors across the cell cycle
Source: eLife. 2019 Dec 3;8:e50087. doi: 10.7554/eLife.50087 (PMC6890464; doi:10.7554/eLife.50087)
Supplement: Figure 4—source data 1. — Time is in hours; Signal is the background-subtracted mean intensity; Cell is the cell unique identifier of each tracked cell; Treatment indicates IAA or Washout just prior to imaging. [file elife-50087-fig4-data1.xlsx]

## Sheet: OCT4AID_timelapse_data
Time	Signal	Cell	Treatment
0	168.531	A5fld7_merge_1	IAA
0.166667	164.611	A5fld7_merge_1	IAA
0.333333	137.495	A5fld7_merge_1	IAA
0.5	167.891	A5fld7_merge_1	IAA
0.666667	150.895	A5fld7_merge_1	IAA
0.833333	161.947	A5fld7_merge_1	IAA
1	145.621	A5fld7_merge_1	IAA
1.16667	142.348	A5fld7_merge_1	IAA
1.33333	120.912	A5fld7_merge_1	IAA
1.5	119.606	A5fld7_merge_1	IAA
1.66667	117.269	A5fld7_merge_1	IAA
1.83333	108.04	A5fld7_merge_1	IAA
2	93.005	A5fld7_merge_1	IAA
2.16667	88.999	A5fld7_merge_1	IAA
2.33333	91.865	A5fld7_merge_1	IAA
2.5	88.288	A5fld7_merge_1	IAA
2.66667	75.641	A5fld7_merge_1	IAA
2.83333	74.304	A5fld7_merge_1	IAA
3	64.471	A5fld7_merge_1	IAA
3.16667	46.8	A5fld7_merge_1	IAA
3.33333	32.978	A5fld7_merge_1	IAA
3.5	26.943	A5fld7_merge_1	IAA
3.66667	17.867	A5fld7_merge_1	IAA
3.83333	20.951	A5fld7_merge_1	IAA
4	11.662	A5fld7_merge_1	IAA
4.16667	8.944	A5fld7_merge_1	IAA
4.33333	7.743	A5fld7_merge_1	IAA
4.5	8.889	A5fld7_merge_1	IAA
4.66667	6.487	A5fld7_merge_1	IAA
4.83333	9.709	A5fld7_merge_1	IAA
0	137.069	A5fld7_merge_2	IAA
0.166667	125.696	A5fld7_merge_2	IAA
0.333333	128.91	A5fld7_merge_2	IAA
0.5	115.252	A5fld7_merge_2	IAA
0.666667	113.262	A5fld7_merge_2	IAA
0.833333	107.583	A5fld7_merge_2	IAA
1	96.712	A5fld7_merge_2	IAA
1.16667	88.611	A5fld7_merge_2	IAA
1.33333	70.374	A5fld7_merge_2	IAA
1.5	62.315	A5fld7_merge_2	IAA
1.66667	55.883	A5fld7_merge_2	IAA
1.83333	46.869	A5fld7_merge_2	IAA
2	35.891	A5fld7_merge_2	IAA
2.16667	19.53	A5fld7_merge_2	IAA
2.33333	17.767	A5fld7_merge_2	IAA
2.5	10.316	A5fld7_merge_2	IAA
2.66667	8.324	A5fld7_merge_2	IAA
2.83333	2.848	A5fld7_merge_2	IAA
3	11.417	A5fld7_merge_2	IAA
3.16667	7.92	A5fld7_merge_2	IAA
3.33333	10.639	A5fld7_merge_2	IAA
3.5	2.287	A5fld7_merge_2	IAA
3.66667	3.693	A5fld7_merge_2	IAA
3.83333	9.853	A5fld7_merge_2	IAA
4	8.519	A5fld7_merge_2	IAA
4.16667	8.628	A5fld7_merge_2	IAA
4.33333	7.224	A5fld7_merge_2	IAA
4.5	6.677	A5fld7_merge_2	IAA
4.66667	7.518	A5fld7_merge_2	IAA
4.83333	8.858	A5fld7_merge_2	IAA
0	56.271	A5fld7_merge_4	IAA
0.166667	42.912	A5fld7_merge_4	IAA
0.333333	29.35	A5fld7_merge_4	IAA
0.5	30.837	A5fld7_merge_4	IAA
0.666667	20.832	A5fld7_merge_4	IAA
0.833333	10.611	A5fld7_merge_4	IAA
1	6.159	A5fld7_merge_4	IAA
1.16667	7.516	A5fld7_merge_4	IAA
1.33333	12.805	A5fld7_merge_4	IAA
1.5	6.08	A5fld7_merge_4	IAA
1.66667	10.177	A5fld7_merge_4	IAA
1.83333	7.135	A5fld7_merge_4	IAA
2	10.486	A5fld7_merge_4	IAA
2.16667	4.167	A5fld7_merge_4	IAA
2.33333	10.058	A5fld7_merge_4	IAA
2.5	5.867	A5fld7_merge_4	IAA
2.66667	5.603	A5fld7_merge_4	IAA
2.83333	4.364	A5fld7_merge_4	IAA
3	6.753	A5fld7_merge_4	IAA
3.16667	4.553	A5fld7_merge_4	IAA
3.33333	4.959	A5fld7_merge_4	IAA
3.5	6.854	A5fld7_merge_4	IAA
3.66667	3.636	A5fld7_merge_4	IAA
3.83333	9.593	A5fld7_merge_4	IAA
4	7.813	A5fld7_merge_4	IAA
4.16667	10.387	A5fld7_merge_4	IAA
4.33333	3.942	A5fld7_merge_4	IAA
4.5	2.098	A5fld7_merge_4	IAA
4.66667	6.999	A5fld7_merge_4	IAA
4.83333	5.773	A5fld7_merge_4	IAA
0	72.338	A5fld7_merge_5	IAA
0.166667	64.146	A5fld7_merge_5	IAA
0.333333	45.812	A5fld7_merge_5	IAA
0.5	19.233	A5fld7_merge_5	IAA
0.666667	10.762	A5fld7_merge_5	IAA
0.833333	2.374	A5fld7_merge_5	IAA
1	10.886	A5fld7_merge_5	IAA
1.16667	0.665	A5fld7_merge_5	IAA
1.33333	4.226	A5fld7_merge_5	IAA
1.5	0.755	A5fld7_merge_5	IAA
1.66667	4.272	A5fld7_merge_5	IAA
1.83333	5.809	A5fld7_merge_5	IAA
2	3.97	A5fld7_merge_5	IAA
2.16667	3.413	A5fld7_merge_5	IAA
2.33333	2.789	A5fld7_merge_5	IAA
2.5	1.772	A5fld7_merge_5	IAA
2.66667	3.596	A5fld7_merge_5	IAA
2.83333	5.512	A5fld7_merge_5	IAA
3	3.715	A5fld7_merge_5	IAA
3.16667	6.73	A5fld7_merge_5	IAA
3.33333	6.155	A5fld7_merge_5	IAA
3.5	-0.254	A5fld7_merge_5	IAA
3.66667	1.013	A5fld7_merge_5	IAA
3.83333	3.65	A5fld7_merge_5	IAA
4	2.003	A5fld7_merge_5	IAA
4.16667	3.868	A5fld7_merge_5	IAA
4.33333	0.182	A5fld7_merge_5	IAA
4.5	1.174	A5fld7_merge_5	IAA
4.66667	4.382	A5fld7_merge_5	IAA
4.83333	3.703	A5fld7_merge_5	IAA
0	48.423	A5fld7_merge_6	IAA
0.166667	33.779	A5fld7_merge_6	IAA
0.333333	19.375	A5fld7_merge_6	IAA
0.5	3.534	A5fld7_merge_6	IAA
0.666667	4.078	A5fld7_merge_6	IAA
0.833333	2.146	A5fld7_merge_6	IAA
1	2.731	A5fld7_merge_6	IAA
1.16667	-0.889	A5fld7_merge_6	IAA
1.33333	3.219	A5fld7_merge_6	IAA
1.5	5.394	A5fld7_merge_6	IAA
1.66667	8.595	A5fld7_merge_6	IAA
1.83333	4.284	A5fld7_merge_6	IAA
2	-3.207	A5fld7_merge_6	IAA
2.16667	2.812	A5fld7_merge_6	IAA
2.33333	0.004	A5fld7_merge_6	IAA
2.5	4.073	A5fld7_merge_6	IAA
2.66667	1.992	A5fld7_merge_6	IAA
2.83333	0.987	A5fld7_merge_6	IAA
3	5.585	A5fld7_merge_6	IAA
3.16667	1.217	A5fld7_merge_6	IAA
3.33333	0.507	A5fld7_merge_6	IAA
3.5	3.237	A5fld7_merge_6	IAA
3.66667	-0.468	A5fld7_merge_6	IAA
3.83333	0.179	A5fld7_merge_6	IAA
4	-1.623	A5fld7_merge_6	IAA
4.16667	0.748	A5fld7_merge_6	IAA
4.33333	-0.235	A5fld7_merge_6	IAA
4.5	-2.658	A5fld7_merge_6	IAA
4.66667	-0.994	A5fld7_merge_6	IAA
4.83333	-0.003	A5fld7_merge_6	IAA
0	32.964	A5fld7_merge_7	IAA
0.166667	27.048	A5fld7_merge_7	IAA
0.333333	6.913	A5fld7_merge_7	IAA
0.5	0.119	A5fld7_merge_7	IAA
0.666667	-0.611	A5fld7_merge_7	IAA
0.833333	2.725	A5fld7_merge_7	IAA
1	-1.642	A5fld7_merge_7	IAA
1.16667	-1.515	A5fld7_merge_7	IAA
1.33333	3.691	A5fld7_merge_7	IAA
1.5	3.207	A5fld7_merge_7	IAA
1.66667	-1.636	A5fld7_merge_7	IAA
1.83333	-0.957	A5fld7_merge_7	IAA
2	3.495	A5fld7_merge_7	IAA
2.16667	-3.093	A5fld7_merge_7	IAA
2.33333	-2.261	A5fld7_merge_7	IAA
2.5	5.396	A5fld7_merge_7	IAA
2.66667	4.618	A5fld7_merge_7	IAA
2.83333	2.557	A5fld7_merge_7	IAA
3	3.813	A5fld7_merge_7	IAA
3.16667	1.698	A5fld7_merge_7	IAA
3.33333	1.867	A5fld7_merge_7	IAA
3.5	0.3	A5fld7_merge_7	IAA
3.66667	-2.528	A5fld7_merge_7	IAA
3.83333	1.701	A5fld7_merge_7	IAA
4	1.051	A5fld7_merge_7	IAA
4.16667	-2.262	A5fld7_merge_7	IAA
4.33333	-0.973	A5fld7_merge_7	IAA
4.5	-0.842	A5fld7_merge_7	IAA
4.66667	2.873	A5fld7_merge_7	IAA
4.83333	0.482	A5fld7_merge_7	IAA
0	137.417	A5fld7_merge_8	IAA
0.166667	131.554	A5fld7_merge_8	IAA
0.333333	130.654	A5fld7_merge_8	IAA
0.5	105.812	A5fld7_merge_8	IAA
0.666667	76.408	A5fld7_merge_8	IAA
0.833333	38.808	A5fld7_merge_8	IAA
1	18.038	A5fld7_merge_8	IAA
1.16667	15.178	A5fld7_merge_8	IAA
1.33333	11.39	A5fld7_merge_8	IAA
1.5	17.112	A5fld7_merge_8	IAA
1.66667	13.699	A5fld7_merge_8	IAA
1.83333	15.227	A5fld7_merge_8	IAA
2	9.878	A5fld7_merge_8	IAA
2.16667	9.676	A5fld7_merge_8	IAA
2.33333	9.194	A5fld7_merge_8	IAA
2.5	11.674	A5fld7_merge_8	IAA
2.66667	11.508	A5fld7_merge_8	IAA
2.83333	20.509	A5fld7_merge_8	IAA
3	21.709	A5fld7_merge_8	IAA
3.16667	20.917	A5fld7_merge_8	IAA
3.33333	16.532	A5fld7_merge_8	IAA
3.5	14.661	A5fld7_merge_8	IAA
3.66667	22.852	A5fld7_merge_8	IAA
3.83333	16.255	A5fld7_merge_8	IAA
4	16.829	A5fld7_merge_8	IAA
4.16667	14.479	A5fld7_merge_8	IAA
4.33333	8.049	A5fld7_merge_8	IAA
4.5	23.155	A5fld7_merge_8	IAA
4.66667	15.335	A5fld7_merge_8	IAA
4.83333	21.096	A5fld7_merge_8	IAA
0	155.018	A5fld7_merge_9	IAA
0.166667	122.336	A5fld7_merge_9	IAA
0.333333	86.625	A5fld7_merge_9	IAA
0.5	65.483	A5fld7_merge_9	IAA
0.666667	25.813	A5fld7_merge_9	IAA
0.833333	5.719	A5fld7_merge_9	IAA
1	7.39	A5fld7_merge_9	IAA
1.16667	4.921	A5fld7_merge_9	IAA
1.33333	8.083	A5fld7_merge_9	IAA
1.5	2.694	A5fld7_merge_9	IAA
1.66667	6.715	A5fld7_merge_9	IAA
1.83333	7.407	A5fld7_merge_9	IAA
2	4.457	A5fld7_merge_9	IAA
2.16667	6.458	A5fld7_merge_9	IAA
2.33333	2.517	A5fld7_merge_9	IAA
2.5	1.997	A5fld7_merge_9	IAA
2.66667	5.311	A5fld7_merge_9	IAA
2.83333	1.959	A5fld7_merge_9	IAA
3	6.215	A5fld7_merge_9	IAA
3.16667	4.157	A5fld7_merge_9	IAA
3.33333	2.706	A5fld7_merge_9	IAA
3.5	-0.083	A5fld7_merge_9	IAA
3.66667	4.741	A5fld7_merge_9	IAA
3.83333	3.188	A5fld7_merge_9	IAA
4	3.601	A5fld7_merge_9	IAA
4.16667	3.874	A5fld7_merge_9	IAA
4.33333	-2.308	A5fld7_merge_9	IAA
4.5	3.31	A5fld7_merge_9	IAA
4.66667	-0.035	A5fld7_merge_9	IAA
4.83333	2.789	A5fld7_merge_9	IAA
0	140.496	A5fld7_merge_10	IAA
0.166667	119.383	A5fld7_merge_10	IAA
0.333333	108.467	A5fld7_merge_10	IAA
0.5	98.945	A5fld7_merge_10	IAA
0.666667	52.93	A5fld7_merge_10	IAA
0.833333	11.944	A5fld7_merge_10	IAA
1	5.51	A5fld7_merge_10	IAA
1.16667	3.652	A5fld7_merge_10	IAA
1.33333	8.355	A5fld7_merge_10	IAA
1.5	1.773	A5fld7_merge_10	IAA
1.66667	5.066	A5fld7_merge_10	IAA
1.83333	5.157	A5fld7_merge_10	IAA
2	3.565	A5fld7_merge_10	IAA
2.16667	2.749	A5fld7_merge_10	IAA
2.33333	7.89	A5fld7_merge_10	IAA
2.5	4.459	A5fld7_merge_10	IAA
2.66667	12.375	A5fld7_merge_10	IAA
2.83333	4.88	A5fld7_merge_10	IAA
3	10.05	A5fld7_merge_10	IAA
3.16667	5.36	A5fld7_merge_10	IAA
3.33333	10.896	A5fld7_merge_10	IAA
3.5	7.56	A5fld7_merge_10	IAA
3.66667	-0.74	A5fld7_merge_10	IAA
3.83333	8.175	A5fld7_merge_10	IAA
4	3.563	A5fld7_merge_10	IAA
4.16667	5.811	A5fld7_merge_10	IAA
4.33333	1.53	A5fld7_merge_10	IAA
4.5	1.158	A5fld7_merge_10	IAA
4.66667	2.132	A5fld7_merge_10	IAA
4.83333	4.023	A5fld7_merge_10	IAA
0	91.224	A5fld7_merge_11	IAA
0.166667	72.003	A5fld7_merge_11	IAA
0.333333	54.682	A5fld7_merge_11	IAA
0.5	23.499	A5fld7_merge_11	IAA
0.666667	11.917	A5fld7_merge_11	IAA
0.833333	2.32	A5fld7_merge_11	IAA
1	2.548	A5fld7_merge_11	IAA
1.16667	1.225	A5fld7_merge_11	IAA
1.33333	6.014	A5fld7_merge_11	IAA
1.5	2.255	A5fld7_merge_11	IAA
1.66667	4.886	A5fld7_merge_11	IAA
1.83333	1.793	A5fld7_merge_11	IAA
2	4.511	A5fld7_merge_11	IAA
2.16667	3.236	A5fld7_merge_11	IAA
2.33333	7.963	A5fld7_merge_11	IAA
2.5	3.104	A5fld7_merge_11	IAA
2.66667	1.989	A5fld7_merge_11	IAA
2.83333	7.487	A5fld7_merge_11	IAA
3	3.595	A5fld7_merge_11	IAA
3.16667	2.711	A5fld7_merge_11	IAA
3.33333	0.981	A5fld7_merge_11	IAA
3.5	3.696	A5fld7_merge_11	IAA
3.66667	2.589	A5fld7_merge_11	IAA
3.83333	6.72	A5fld7_merge_11	IAA
4	1.57	A5fld7_merge_11	IAA
4.16667	2.643	A5fld7_merge_11	IAA
4.33333	1.182	A5fld7_merge_11	IAA
4.5	7.342	A5fld7_merge_11	IAA
4.66667	4.965	A5fld7_merge_11	IAA
4.83333	6.108	A5fld7_merge_11	IAA
0	135.405	A5fld1_1	IAA
0.166667	90.247	A5fld1_1	IAA
0.333333	52.581	A5fld1_1	IAA
0.5	22.327	A5fld1_1	IAA
0.666667	20.005	A5fld1_1	IAA
0.833333	17.921	A5fld1_1	IAA
1	11.158	A5fld1_1	IAA
1.16667	16.67	A5fld1_1	IAA
1.33333	18.864	A5fld1_1	IAA
1.5	23.327	A5fld1_1	IAA
1.66667	11.698	A5fld1_1	IAA
1.83333	10.082	A5fld1_1	IAA
2	19.581	A5fld1_1	IAA
2.16667	16.022	A5fld1_1	IAA
2.33333	12.404	A5fld1_1	IAA
2.5	16.362	A5fld1_1	IAA
2.66667	16.817	A5fld1_1	IAA
2.83333	15.522	A5fld1_1	IAA
3	12.603	A5fld1_1	IAA
3.16667	15.965	A5fld1_1	IAA
3.33333	14.407	A5fld1_1	IAA
3.5	11.431	A5fld1_1	IAA
3.66667	13.299	A5fld1_1	IAA
3.83333	9.246	A5fld1_1	IAA
4	14.676	A5fld1_1	IAA
4.16667	9.248	A5fld1_1	IAA
4.33333	15.548	A5fld1_1	IAA
4.5	14.266	A5fld1_1	IAA
4.66667	13.743	A5fld1_1	IAA
4.83333	7.43	A5fld1_1	IAA
0	101.981	A5fld1_2	IAA
0.166667	72.361	A5fld1_2	IAA
0.333333	40.569	A5fld1_2	IAA
0.5	16.855	A5fld1_2	IAA
0.666667	12.011	A5fld1_2	IAA
0.833333	12.899	A5fld1_2	IAA
1	6.93	A5fld1_2	IAA
1.16667	5.198	A5fld1_2	IAA
1.33333	3.148	A5fld1_2	IAA
1.5	7.587	A5fld1_2	IAA
1.66667	12.625	A5fld1_2	IAA
1.83333	9.962	A5fld1_2	IAA
2	1.938	A5fld1_2	IAA
2.16667	7.56	A5fld1_2	IAA
2.33333	6.705	A5fld1_2	IAA
2.5	5.995	A5fld1_2	IAA
2.66667	7.693	A5fld1_2	IAA
2.83333	9.942	A5fld1_2	IAA
3	3.96	A5fld1_2	IAA
3.16667	12.734	A5fld1_2	IAA
3.33333	9.565	A5fld1_2	IAA
3.5	6.738	A5fld1_2	IAA
3.66667	8.403	A5fld1_2	IAA
3.83333	9.287	A5fld1_2	IAA
4	4.379	A5fld1_2	IAA
4.16667	2.356	A5fld1_2	IAA
4.33333	9.966	A5fld1_2	IAA
4.5	11.333	A5fld1_2	IAA
4.66667	7.835	A5fld1_2	IAA
4.83333	6.94	A5fld1_2	IAA
0	110.449	A5fld1_3	IAA
0.166667	74.933	A5fld1_3	IAA
0.333333	54.926	A5fld1_3	IAA
0.5	29.28	A5fld1_3	IAA
0.666667	19.524	A5fld1_3	IAA
0.833333	14.639	A5fld1_3	IAA
1	27.206	A5fld1_3	IAA
1.16667	27.999	A5fld1_3	IAA
1.33333	23.221	A5fld1_3	IAA
1.5	25.074	A5fld1_3	IAA
1.66667	27.35	A5fld1_3	IAA
1.83333	29.541	A5fld1_3	IAA
2	25.432	A5fld1_3	IAA
2.16667	21.19	A5fld1_3	IAA
2.33333	22.518	A5fld1_3	IAA
2.5	24.992	A5fld1_3	IAA
2.66667	29.133	A5fld1_3	IAA
2.83333	19.427	A5fld1_3	IAA
3	24.337	A5fld1_3	IAA
3.16667	12.968	A5fld1_3	IAA
3.33333	19.793	A5fld1_3	IAA
3.5	14.127	A5fld1_3	IAA
3.66667	15.732	A5fld1_3	IAA
3.83333	13.781	A5fld1_3	IAA
4	19.705	A5fld1_3	IAA
4.16667	18.846	A5fld1_3	IAA
4.33333	12.324	A5fld1_3	IAA
4.5	15.273	A5fld1_3	IAA
4.66667	15.192	A5fld1_3	IAA
4.83333	15.528	A5fld1_3	IAA
0	144.569	A5fld1_4	IAA
0.166667	161.291	A5fld1_4	IAA
0.333333	82.847	A5fld1_4	IAA
0.5	28.596	A5fld1_4	IAA
0.666667	27.413	A5fld1_4	IAA
0.833333	22.31	A5fld1_4	IAA
1	15.848	A5fld1_4	IAA
1.16667	13.872	A5fld1_4	IAA
1.33333	16.576	A5fld1_4	IAA
1.5	14.245	A5fld1_4	IAA
1.66667	14.28	A5fld1_4	IAA
1.83333	15.715	A5fld1_4	IAA
2	7.951	A5fld1_4	IAA
2.16667	11.389	A5fld1_4	IAA
2.33333	6.847	A5fld1_4	IAA
2.5	11.773	A5fld1_4	IAA
2.66667	14.418	A5fld1_4	IAA
2.83333	11.477	A5fld1_4	IAA
3	9.9	A5fld1_4	IAA
3.16667	7.244	A5fld1_4	IAA
3.33333	11.322	A5fld1_4	IAA
3.5	7.529	A5fld1_4	IAA
3.66667	10.159	A5fld1_4	IAA
3.83333	12.974	A5fld1_4	IAA
4	15.385	A5fld1_4	IAA
4.16667	8.925	A5fld1_4	IAA
4.33333	9.615	A5fld1_4	IAA
4.5	10.868	A5fld1_4	IAA
4.66667	11.214	A5fld1_4	IAA
4.83333	9.183	A5fld1_4	IAA
0	160.671	A5fld1_5	IAA
0.166667	140.55	A5fld1_5	IAA
0.333333	87.372	A5fld1_5	IAA
0.5	30.539	A5fld1_5	IAA
0.666667	15.331	A5fld1_5	IAA
0.833333	11.649	A5fld1_5	IAA
1	6.94	A5fld1_5	IAA
1.16667	5.704	A5fld1_5	IAA
1.33333	9.205	A5fld1_5	IAA
1.5	6.71	A5fld1_5	IAA
1.66667	10.077	A5fld1_5	IAA
1.83333	11.5	A5fld1_5	IAA
2	7.448	A5fld1_5	IAA
2.16667	2.06	A5fld1_5	IAA
2.33333	9.806	A5fld1_5	IAA
2.5	6.422	A5fld1_5	IAA
2.66667	9.921	A5fld1_5	IAA
2.83333	6.205	A5fld1_5	IAA
3	7.59	A5fld1_5	IAA
3.16667	7.899	A5fld1_5	IAA
3.33333	6.252	A5fld1_5	IAA
3.5	2.13	A5fld1_5	IAA
3.66667	7.365	A5fld1_5	IAA
3.83333	8.926	A5fld1_5	IAA
4	-1.194	A5fld1_5	IAA
4.16667	3.08	A5fld1_5	IAA
4.33333	12.884	A5fld1_5	IAA
4.5	8.051	A5fld1_5	IAA
4.66667	2.009	A5fld1_5	IAA
4.83333	7.373	A5fld1_5	IAA
0	56.196	A5fld1_6	IAA
0.166667	42.937	A5fld1_6	IAA
0.333333	41.524	A5fld1_6	IAA
0.5	21.242	A5fld1_6	IAA
0.666667	9.562	A5fld1_6	IAA
0.833333	9.952	A5fld1_6	IAA
1	8.449	A5fld1_6	IAA
1.16667	7.629	A5fld1_6	IAA
1.33333	10.582	A5fld1_6	IAA
1.5	2.872	A5fld1_6	IAA
1.66667	9.454	A5fld1_6	IAA
1.83333	9.383	A5fld1_6	IAA
2	12.707	A5fld1_6	IAA
2.16667	6.791	A5fld1_6	IAA
2.33333	6.005	A5fld1_6	IAA
2.5	10.425	A5fld1_6	IAA
2.66667	4.747	A5fld1_6	IAA
2.83333	1.775	A5fld1_6	IAA
3	3.277	A5fld1_6	IAA
3.16667	3.038	A5fld1_6	IAA
3.33333	5.277	A5fld1_6	IAA
3.5	-0.044	A5fld1_6	IAA
3.66667	0.501	A5fld1_6	IAA
3.83333	3.059	A5fld1_6	IAA
4	2.328	A5fld1_6	IAA
4.16667	5.131	A5fld1_6	IAA
4.33333	6.58	A5fld1_6	IAA
4.5	1.675	A5fld1_6	IAA
4.66667	6.724	A5fld1_6	IAA
4.83333	6.104	A5fld1_6	IAA
0	87.842	A5fld1_7	IAA
0.166667	57.272	A5fld1_7	IAA
0.333333	55.322	A5fld1_7	IAA
0.5	29.333	A5fld1_7	IAA
0.666667	10.945	A5fld1_7	IAA
0.833333	5.99	A5fld1_7	IAA
1	4.123	A5fld1_7	IAA
1.16667	4.306	A5fld1_7	IAA
1.33333	4.186	A5fld1_7	IAA
1.5	4.992	A5fld1_7	IAA
1.66667	7.701	A5fld1_7	IAA
1.83333	7.114	A5fld1_7	IAA
2	8.587	A5fld1_7	IAA
2.16667	1.07	A5fld1_7	IAA
2.33333	6.803	A5fld1_7	IAA
2.5	12.16	A5fld1_7	IAA
2.66667	4.193	A5fld1_7	IAA
2.83333	4.18	A5fld1_7	IAA
3	2.242	A5fld1_7	IAA
3.16667	3.997	A5fld1_7	IAA
3.33333	5.638	A5fld1_7	IAA
3.5	-0.278	A5fld1_7	IAA
3.66667	4.875	A5fld1_7	IAA
3.83333	10.192	A5fld1_7	IAA
4	7.54	A5fld1_7	IAA
4.16667	0.467	A5fld1_7	IAA
4.33333	7.165	A5fld1_7	IAA
4.5	7.928	A5fld1_7	IAA
4.66667	3.524	A5fld1_7	IAA
4.83333	-3.212	A5fld1_7	IAA
0	73.085	A5fld1_8	IAA
0.166667	129.617	A5fld1_8	IAA
0.333333	95.891	A5fld1_8	IAA
0.5	45.232	A5fld1_8	IAA
0.666667	11.837	A5fld1_8	IAA
0.833333	5.706	A5fld1_8	IAA
1	8.725	A5fld1_8	IAA
1.16667	6.635	A5fld1_8	IAA
1.33333	3.386	A5fld1_8	IAA
1.5	6.691	A5fld1_8	IAA
1.66667	6.191	A5fld1_8	IAA
1.83333	7.455	A5fld1_8	IAA
2	4.657	A5fld1_8	IAA
2.16667	3.75	A5fld1_8	IAA
2.33333	6.312	A5fld1_8	IAA
2.5	1.966	A5fld1_8	IAA
2.66667	5.763	A5fld1_8	IAA
2.83333	5.243	A5fld1_8	IAA
3	7.894	A5fld1_8	IAA
3.16667	6.889	A5fld1_8	IAA
3.33333	2.863	A5fld1_8	IAA
3.5	4.004	A5fld1_8	IAA
3.66667	3.375	A5fld1_8	IAA
3.83333	7.398	A5fld1_8	IAA
4	4.635	A5fld1_8	IAA
4.16667	6.761	A5fld1_8	IAA
4.33333	4.697	A5fld1_8	IAA
4.5	3.152	A5fld1_8	IAA
4.66667	5.74	A5fld1_8	IAA
4.83333	0.424	A5fld1_8	IAA
0	60.559	A5fld9_1	IAA
0.166667	41.234	A5fld9_1	IAA
0.333333	8.286	A5fld9_1	IAA
0.5	4.427	A5fld9_1	IAA
0.666667	3.314	A5fld9_1	IAA
0.833333	5.263	A5fld9_1	IAA
1	-0.92	A5fld9_1	IAA
1.16667	6.737	A5fld9_1	IAA
1.33333	7.152	A5fld9_1	IAA
1.5	-1.843	A5fld9_1	IAA
1.66667	1.993	A5fld9_1	IAA
1.83333	0.007	A5fld9_1	IAA
2	6.329	A5fld9_1	IAA
2.16667	5.024	A5fld9_1	IAA
2.33333	2.128	A5fld9_1	IAA
2.5	2.334	A5fld9_1	IAA
2.66667	2.432	A5fld9_1	IAA
2.83333	-1.143	A5fld9_1	IAA
3	3.147	A5fld9_1	IAA
3.16667	-3.954	A5fld9_1	IAA
3.33333	5.272	A5fld9_1	IAA
3.5	-0.862	A5fld9_1	IAA
3.66667	2.037	A5fld9_1	IAA
3.83333	5.713	A5fld9_1	IAA
4	2.489	A5fld9_1	IAA
4.16667	2.788	A5fld9_1	IAA
4.33333	5.051	A5fld9_1	IAA
4.5	1.602	A5fld9_1	IAA
4.66667	3.137	A5fld9_1	IAA
4.83333	0.923	A5fld9_1	IAA
0	46.065	A5fld9_2	IAA
0.166667	50.396	A5fld9_2	IAA
0.333333	12.093	A5fld9_2	IAA
0.5	-0.079	A5fld9_2	IAA
0.666667	1.181	A5fld9_2	IAA
0.833333	1.51	A5fld9_2	IAA
1	2.036	A5fld9_2	IAA
1.16667	3.177	A5fld9_2	IAA
1.33333	0.794	A5fld9_2	IAA
1.5	-3.9	A5fld9_2	IAA
1.66667	3.287	A5fld9_2	IAA
1.83333	6.801	A5fld9_2	IAA
2	0.529	A5fld9_2	IAA
2.16667	-2.26	A5fld9_2	IAA
2.33333	2.432	A5fld9_2	IAA
2.5	3.555	A5fld9_2	IAA
2.66667	3.131	A5fld9_2	IAA
2.83333	1.284	A5fld9_2	IAA
3	2.005	A5fld9_2	IAA
3.16667	-4.213	A5fld9_2	IAA
3.33333	2.658	A5fld9_2	IAA
3.5	1.091	A5fld9_2	IAA
3.66667	2.085	A5fld9_2	IAA
3.83333	-1.256	A5fld9_2	IAA
4	-2.056	A5fld9_2	IAA
4.16667	3.389	A5fld9_2	IAA
4.33333	-0.971	A5fld9_2	IAA
4.5	4.754	A5fld9_2	IAA
4.66667	4.048	A5fld9_2	IAA
4.83333	2.081	A5fld9_2	IAA
0	59.97	A5fld9_3	IAA
0.166667	54.902	A5fld9_3	IAA
0.333333	49.055	A5fld9_3	IAA
0.5	26.127	A5fld9_3	IAA
0.666667	8.286	A5fld9_3	IAA
0.833333	8.326	A5fld9_3	IAA
1	0.956	A5fld9_3	IAA
1.16667	4.209	A5fld9_3	IAA
1.33333	2.801	A5fld9_3	IAA
1.5	3.42	A5fld9_3	IAA
1.66667	0.876	A5fld9_3	IAA
1.83333	-0.942	A5fld9_3	IAA
2	-1.427	A5fld9_3	IAA
2.16667	6.695	A5fld9_3	IAA
2.33333	5.884	A5fld9_3	IAA
2.5	5.118	A5fld9_3	IAA
2.66667	6.47	A5fld9_3	IAA
2.83333	5.914	A5fld9_3	IAA
3	6.207	A5fld9_3	IAA
3.16667	-0.492	A5fld9_3	IAA
3.33333	4.74	A5fld9_3	IAA
3.5	0.119	A5fld9_3	IAA
3.66667	4.363	A5fld9_3	IAA
3.83333	3.612	A5fld9_3	IAA
4	5.172	A5fld9_3	IAA
4.16667	4.006	A5fld9_3	IAA
4.33333	7.323	A5fld9_3	IAA
4.5	-1.319	A5fld9_3	IAA
4.66667	2.899	A5fld9_3	IAA
4.83333	2.844	A5fld9_3	IAA
0	38.989	A5fld9_4	IAA
0.166667	33.782	A5fld9_4	IAA
0.333333	36.76	A5fld9_4	IAA
0.5	34.31	A5fld9_4	IAA
0.666667	29.349	A5fld9_4	IAA
0.833333	38.38	A5fld9_4	IAA
1	28.934	A5fld9_4	IAA
1.16667	25.936	A5fld9_4	IAA
1.33333	34.538	A5fld9_4	IAA
1.5	32.683	A5fld9_4	IAA
1.66667	26.66	A5fld9_4	IAA
1.83333	27.858	A5fld9_4	IAA
2	21.181	A5fld9_4	IAA
2.16667	16.626	A5fld9_4	IAA
2.33333	18.479	A5fld9_4	IAA
2.5	19.558	A5fld9_4	IAA
2.66667	17.748	A5fld9_4	IAA
2.83333	14.98	A5fld9_4	IAA
3	11.53	A5fld9_4	IAA
3.16667	17.103	A5fld9_4	IAA
3.33333	16.933	A5fld9_4	IAA
3.5	12.069	A5fld9_4	IAA
3.66667	8.142	A5fld9_4	IAA
3.83333	10.042	A5fld9_4	IAA
4	8.258	A5fld9_4	IAA
4.16667	13.753	A5fld9_4	IAA
4.33333	5.554	A5fld9_4	IAA
4.5	5.985	A5fld9_4	IAA
4.66667	11.415	A5fld9_4	IAA
4.83333	9.844	A5fld9_4	IAA
0	54.888	A5fld9_5	IAA
0.166667	58.355	A5fld9_5	IAA
0.333333	49.422	A5fld9_5	IAA
0.5	25.456	A5fld9_5	IAA
0.666667	9.083	A5fld9_5	IAA
0.833333	10.317	A5fld9_5	IAA
1	1.51	A5fld9_5	IAA
1.16667	3.066	A5fld9_5	IAA
1.33333	2.411	A5fld9_5	IAA
1.5	2.319	A5fld9_5	IAA
1.66667	1.306	A5fld9_5	IAA
1.83333	0.795	A5fld9_5	IAA
2	-1.765	A5fld9_5	IAA
2.16667	7.24	A5fld9_5	IAA
2.33333	6.258	A5fld9_5	IAA
2.5	6.596	A5fld9_5	IAA
2.66667	6.343	A5fld9_5	IAA
2.83333	3.439	A5fld9_5	IAA
3	6.258	A5fld9_5	IAA
3.16667	3.489	A5fld9_5	IAA
3.33333	4.364	A5fld9_5	IAA
3.5	1.322	A5fld9_5	IAA
3.66667	4.677	A5fld9_5	IAA
3.83333	3.773	A5fld9_5	IAA
4	1.384	A5fld9_5	IAA
4.16667	4.054	A5fld9_5	IAA
4.33333	4.342	A5fld9_5	IAA
4.5	1.567	A5fld9_5	IAA
4.66667	3.513	A5fld9_5	IAA
4.83333	4.046	A5fld9_5	IAA
0	70.362	A5fld9_6	IAA
0.166667	53.516	A5fld9_6	IAA
0.333333	26.083	A5fld9_6	IAA
0.5	6.718	A5fld9_6	IAA
0.666667	3.52	A5fld9_6	IAA
0.833333	3.731	A5fld9_6	IAA
1	1.409	A5fld9_6	IAA
1.16667	6.525	A5fld9_6	IAA
1.33333	3.076	A5fld9_6	IAA
1.5	0.964	A5fld9_6	IAA
1.66667	1.819	A5fld9_6	IAA
1.83333	1.884	A5fld9_6	IAA
2	9.178	A5fld9_6	IAA
2.16667	7.372	A5fld9_6	IAA
2.33333	6.682	A5fld9_6	IAA
2.5	4.897	A5fld9_6	IAA
2.66667	6.135	A5fld9_6	IAA
2.83333	2.503	A5fld9_6	IAA
3	2.239	A5fld9_6	IAA
3.16667	3.483	A5fld9_6	IAA
3.33333	6.572	A5fld9_6	IAA
3.5	1.907	A5fld9_6	IAA
3.66667	6.186	A5fld9_6	IAA
3.83333	1.9	A5fld9_6	IAA
4	5.622	A5fld9_6	IAA
4.16667	3.661	A5fld9_6	IAA
4.33333	4.636	A5fld9_6	IAA
4.5	3.71	A5fld9_6	IAA
4.66667	4.45	A5fld9_6	IAA
4.83333	3.3	A5fld9_6	IAA
0	63.774	A5fld9_7	IAA
0.166667	49.893	A5fld9_7	IAA
0.333333	21.52	A5fld9_7	IAA
0.5	6.883	A5fld9_7	IAA
0.666667	4.504	A5fld9_7	IAA
0.833333	5.431	A5fld9_7	IAA
1	2.979	A5fld9_7	IAA
1.16667	6.133	A5fld9_7	IAA
1.33333	3.858	A5fld9_7	IAA
1.5	7.328	A5fld9_7	IAA
1.66667	10.16	A5fld9_7	IAA
1.83333	3.643	A5fld9_7	IAA
2	10.962	A5fld9_7	IAA
2.16667	6.948	A5fld9_7	IAA
2.33333	5.467	A5fld9_7	IAA
2.5	9.302	A5fld9_7	IAA
2.66667	10.711	A5fld9_7	IAA
2.83333	0.68	A5fld9_7	IAA
3	0.302	A5fld9_7	IAA
3.16667	1.533	A5fld9_7	IAA
3.33333	5.117	A5fld9_7	IAA
3.5	5.559	A5fld9_7	IAA
3.66667	9.667	A5fld9_7	IAA
3.83333	6.184	A5fld9_7	IAA
4	10.713	A5fld9_7	IAA
4.16667	5.281	A5fld9_7	IAA
4.33333	3.826	A5fld9_7	IAA
4.5	4.975	A5fld9_7	IAA
4.66667	3.089	A5fld9_7	IAA
4.83333	0.689	A5fld9_7	IAA
0	100.84	A5fld9_8	IAA
0.166667	87.19	A5fld9_8	IAA
0.333333	70.384	A5fld9_8	IAA
0.5	31.453	A5fld9_8	IAA
0.666667	2.944	A5fld9_8	IAA
0.833333	6.915	A5fld9_8	IAA
1	9.719	A5fld9_8	IAA
1.16667	5.743	A5fld9_8	IAA
1.33333	4.722	A5fld9_8	IAA
1.5	9.284	A5fld9_8	IAA
1.66667	0.701	A5fld9_8	IAA
1.83333	4.111	A5fld9_8	IAA
2	3.899	A5fld9_8	IAA
2.16667	6.259	A5fld9_8	IAA
2.33333	7.153	A5fld9_8	IAA
2.5	2.748	A5fld9_8	IAA
2.66667	4.489	A5fld9_8	IAA
2.83333	2.104	A5fld9_8	IAA
3	4.878	A5fld9_8	IAA
3.16667	4.9	A5fld9_8	IAA
3.33333	5.87	A5fld9_8	IAA
3.5	3.926	A5fld9_8	IAA
3.66667	9.085	A5fld9_8	IAA
3.83333	5.868	A5fld9_8	IAA
4	8.631	A5fld9_8	IAA
4.16667	7.718	A5fld9_8	IAA
4.33333	5.757	A5fld9_8	IAA
4.5	5.358	A5fld9_8	IAA
4.66667	3.355	A5fld9_8	IAA
4.83333	1.939	A5fld9_8	IAA
0	51.692	A5fld9_9	IAA
0.166667	68.582	A5fld9_9	IAA
0.333333	58.745	A5fld9_9	IAA
0.5	44.668	A5fld9_9	IAA
0.666667	24.216	A5fld9_9	IAA
0.833333	18.162	A5fld9_9	IAA
1	24.789	A5fld9_9	IAA
1.16667	19.99	A5fld9_9	IAA
1.33333	16.478	A5fld9_9	IAA
1.5	19.309	A5fld9_9	IAA
1.66667	22.258	A5fld9_9	IAA
1.83333	14.115	A5fld9_9	IAA
2	17.409	A5fld9_9	IAA
2.16667	19.379	A5fld9_9	IAA
2.33333	19.986	A5fld9_9	IAA
2.5	19.508	A5fld9_9	IAA
2.66667	26.847	A5fld9_9	IAA
2.83333	17.851	A5fld9_9	IAA
3	17.331	A5fld9_9	IAA
3.16667	22.277	A5fld9_9	IAA
3.33333	22.921	A5fld9_9	IAA
3.5	19.129	A5fld9_9	IAA
3.66667	18.12	A5fld9_9	IAA
3.83333	26.507	A5fld9_9	IAA
4	15.634	A5fld9_9	IAA
4.16667	17.288	A5fld9_9	IAA
4.33333	18.06	A5fld9_9	IAA
4.5	18.684	A5fld9_9	IAA
4.66667	17.959	A5fld9_9	IAA
4.83333	12.705	A5fld9_9	IAA
0	56.34	A5fld9_10	IAA
0.166667	44.56	A5fld9_10	IAA
0.333333	23.089	A5fld9_10	IAA
0.5	12.494	A5fld9_10	IAA
0.666667	9.21	A5fld9_10	IAA
0.833333	17.402	A5fld9_10	IAA
1	14.741	A5fld9_10	IAA
1.16667	16.202	A5fld9_10	IAA
1.33333	18.93	A5fld9_10	IAA
1.5	12.085	A5fld9_10	IAA
1.66667	13.088	A5fld9_10	IAA
1.83333	11.222	A5fld9_10	IAA
2	12.393	A5fld9_10	IAA
2.16667	10.784	A5fld9_10	IAA
2.33333	8.482	A5fld9_10	IAA
2.5	16.14	A5fld9_10	IAA
2.66667	13.929	A5fld9_10	IAA
2.83333	13.11	A5fld9_10	IAA
3	12.077	A5fld9_10	IAA
3.16667	3.394	A5fld9_10	IAA
3.33333	20.348	A5fld9_10	IAA
3.5	11.23	A5fld9_10	IAA
3.66667	7.218	A5fld9_10	IAA
3.83333	7.947	A5fld9_10	IAA
4	11.504	A5fld9_10	IAA
4.16667	7.05	A5fld9_10	IAA
4.33333	13.861	A5fld9_10	IAA
4.5	9.618	A5fld9_10	IAA
4.66667	9.798	A5fld9_10	IAA
4.83333	15.088	A5fld9_10	IAA
0	71.315	A5fld9_11	IAA
0.166667	52.272	A5fld9_11	IAA
0.333333	35.349	A5fld9_11	IAA
0.5	12.611	A5fld9_11	IAA
0.666667	12.124	A5fld9_11	IAA
0.833333	18.301	A5fld9_11	IAA
1	12.393	A5fld9_11	IAA
1.16667	21.395	A5fld9_11	IAA
1.33333	19.029	A5fld9_11	IAA
1.5	17.214	A5fld9_11	IAA
1.66667	12.23	A5fld9_11	IAA
1.83333	16.646	A5fld9_11	IAA
2	17.684	A5fld9_11	IAA
2.16667	17.344	A5fld9_11	IAA
2.33333	20.979	A5fld9_11	IAA
2.5	18.542	A5fld9_11	IAA
2.66667	17.258	A5fld9_11	IAA
2.83333	8.829	A5fld9_11	IAA
3	14.922	A5fld9_11	IAA
3.16667	8.258	A5fld9_11	IAA
3.33333	14.803	A5fld9_11	IAA
3.5	18.505	A5fld9_11	IAA
3.66667	17.344	A5fld9_11	IAA
3.83333	8.115	A5fld9_11	IAA
4	11.84	A5fld9_11	IAA
4.16667	15.275	A5fld9_11	IAA
4.33333	11.348	A5fld9_11	IAA
4.5	10.118	A5fld9_11	IAA
4.66667	17.576	A5fld9_11	IAA
4.83333	15.062	A5fld9_11	IAA
0	97.704	A5fld9_12	IAA
0.166667	100.598	A5fld9_12	IAA
0.333333	79.245	A5fld9_12	IAA
0.5	43.766	A5fld9_12	IAA
0.666667	17.403	A5fld9_12	IAA
0.833333	11.371	A5fld9_12	IAA
1	15.377	A5fld9_12	IAA
1.16667	9.857	A5fld9_12	IAA
1.33333	15.386	A5fld9_12	IAA
1.5	8.759	A5fld9_12	IAA
1.66667	7.92	A5fld9_12	IAA
1.83333	7.279	A5fld9_12	IAA
2	12.962	A5fld9_12	IAA
2.16667	12.452	A5fld9_12	IAA
2.33333	7.637	A5fld9_12	IAA
2.5	2.343	A5fld9_12	IAA
2.66667	9.23	A5fld9_12	IAA
2.83333	9.499	A5fld9_12	IAA
3	10.074	A5fld9_12	IAA
3.16667	10.062	A5fld9_12	IAA
3.33333	16.402	A5fld9_12	IAA
3.5	25.344	A5fld9_12	IAA
3.66667	30.667	A5fld9_12	IAA
3.83333	26.716	A5fld9_12	IAA
4	16.944	A5fld9_12	IAA
4.16667	15.699	A5fld9_12	IAA
4.33333	17.89	A5fld9_12	IAA
4.5	4.46	A5fld9_12	IAA
4.66667	15.944	A5fld9_12	IAA
4.83333	11.838	A5fld9_12	IAA
0	126.1	A5fld9_13	IAA
0.166667	155.487	A5fld9_13	IAA
0.333333	137.014	A5fld9_13	IAA
0.5	93.769	A5fld9_13	IAA
0.666667	65.387	A5fld9_13	IAA
0.833333	40.529	A5fld9_13	IAA
1	18.339	A5fld9_13	IAA
1.16667	13.715	A5fld9_13	IAA
1.33333	14.873	A5fld9_13	IAA
1.5	16.309	A5fld9_13	IAA
1.66667	12.126	A5fld9_13	IAA
1.83333	16.336	A5fld9_13	IAA
2	23.061	A5fld9_13	IAA
2.16667	17.1	A5fld9_13	IAA
2.33333	18.872	A5fld9_13	IAA
2.5	14.425	A5fld9_13	IAA
2.66667	20.381	A5fld9_13	IAA
2.83333	12.889	A5fld9_13	IAA
3	8.179	A5fld9_13	IAA
3.16667	11.524	A5fld9_13	IAA
3.33333	4.86	A5fld9_13	IAA
3.5	9.375	A5fld9_13	IAA
3.66667	11.249	A5fld9_13	IAA
3.83333	10.08	A5fld9_13	IAA
4	8.296	A5fld9_13	IAA
4.16667	13.778	A5fld9_13	IAA
4.33333	7.121	A5fld9_13	IAA
4.5	11.839	A5fld9_13	IAA
4.66667	18.583	A5fld9_13	IAA
4.83333	17.274	A5fld9_13	IAA
0	166.29	A5fld9_14	IAA
0.166667	143.111	A5fld9_14	IAA
0.333333	91.504	A5fld9_14	IAA
0.5	87.155	A5fld9_14	IAA
0.666667	62.719	A5fld9_14	IAA
0.833333	36.181	A5fld9_14	IAA
1	12.944	A5fld9_14	IAA
1.16667	14.576	A5fld9_14	IAA
1.33333	11.37	A5fld9_14	IAA
1.5	8.99	A5fld9_14	IAA
1.66667	11.369	A5fld9_14	IAA
1.83333	5.808	A5fld9_14	IAA
2	8.665	A5fld9_14	IAA
2.16667	13.385	A5fld9_14	IAA
2.33333	10.59	A5fld9_14	IAA
2.5	15.02	A5fld9_14	IAA
2.66667	14.081	A5fld9_14	IAA
2.83333	15.585	A5fld9_14	IAA
3	13.014	A5fld9_14	IAA
3.16667	11.138	A5fld9_14	IAA
3.33333	9.123	A5fld9_14	IAA
3.5	9.243	A5fld9_14	IAA
3.66667	9.04	A5fld9_14	IAA
3.83333	12.564	A5fld9_14	IAA
4	7.523	A5fld9_14	IAA
4.16667	16.81	A5fld9_14	IAA
4.33333	8.855	A5fld9_14	IAA
4.5	4.102	A5fld9_14	IAA
4.66667	10.912	A5fld9_14	IAA
4.83333	8.898	A5fld9_14	IAA
0	117.065	A5fld9_15	IAA
0.166667	102.747	A5fld9_15	IAA
0.333333	76.798	A5fld9_15	IAA
0.5	44.699	A5fld9_15	IAA
0.666667	25.023	A5fld9_15	IAA
0.833333	16.852	A5fld9_15	IAA
1	8.437	A5fld9_15	IAA
1.16667	8.623	A5fld9_15	IAA
1.33333	14.456	A5fld9_15	IAA
1.5	8.717	A5fld9_15	IAA
1.66667	12.508	A5fld9_15	IAA
1.83333	9.532	A5fld9_15	IAA
2	10.788	A5fld9_15	IAA
2.16667	11.012	A5fld9_15	IAA
2.33333	7.732	A5fld9_15	IAA
2.5	9.603	A5fld9_15	IAA
2.66667	8.163	A5fld9_15	IAA
2.83333	4.135	A5fld9_15	IAA
3	8.862	A5fld9_15	IAA
3.16667	10.546	A5fld9_15	IAA
3.33333	11.914	A5fld9_15	IAA
3.5	5.872	A5fld9_15	IAA
3.66667	10.126	A5fld9_15	IAA
3.83333	16.893	A5fld9_15	IAA
4	6.982	A5fld9_15	IAA
4.16667	11.5	A5fld9_15	IAA
4.33333	6.833	A5fld9_15	IAA
4.5	12.229	A5fld9_15	IAA
4.66667	11.747	A5fld9_15	IAA
4.83333	11.173	A5fld9_15	IAA
0	132.612	A5fld9_16	IAA
0.166667	117.836	A5fld9_16	IAA
0.333333	78.39	A5fld9_16	IAA
0.5	23.405	A5fld9_16	IAA
0.666667	10.397	A5fld9_16	IAA
0.833333	18.488	A5fld9_16	IAA
1	7.491	A5fld9_16	IAA
1.16667	9.965	A5fld9_16	IAA
1.33333	11.845	A5fld9_16	IAA
1.5	13.676	A5fld9_16	IAA
1.66667	9.395	A5fld9_16	IAA
1.83333	4.561	A5fld9_16	IAA
2	7.567	A5fld9_16	IAA
2.16667	13.505	A5fld9_16	IAA
2.33333	13.666	A5fld9_16	IAA
2.5	8.951	A5fld9_16	IAA
2.66667	13.866	A5fld9_16	IAA
2.83333	8.999	A5fld9_16	IAA
3	12.226	A5fld9_16	IAA
3.16667	7.312	A5fld9_16	IAA
3.33333	8.436	A5fld9_16	IAA
3.5	11.597	A5fld9_16	IAA
3.66667	8.825	A5fld9_16	IAA
3.83333	6.669	A5fld9_16	IAA
4	8.033	A5fld9_16	IAA
4.16667	8.471	A5fld9_16	IAA
4.33333	1.782	A5fld9_16	IAA
4.5	4.7	A5fld9_16	IAA
4.66667	9.016	A5fld9_16	IAA
4.83333	4.518	A5fld9_16	IAA
0	120.657	A5fld9_17	IAA
0.166667	120.108	A5fld9_17	IAA
0.333333	85.074	A5fld9_17	IAA
0.5	51.497	A5fld9_17	IAA
0.666667	20.27	A5fld9_17	IAA
0.833333	17.652	A5fld9_17	IAA
1	11.694	A5fld9_17	IAA
1.16667	15.057	A5fld9_17	IAA
1.33333	13.392	A5fld9_17	IAA
1.5	7.268	A5fld9_17	IAA
1.66667	9.325	A5fld9_17	IAA
1.83333	6.33	A5fld9_17	IAA
2	12.19	A5fld9_17	IAA
2.16667	9.736	A5fld9_17	IAA
2.33333	9.637	A5fld9_17	IAA
2.5	6.261	A5fld9_17	IAA
2.66667	3.28	A5fld9_17	IAA
2.83333	4.727	A5fld9_17	IAA
3	6.059	A5fld9_17	IAA
3.16667	10.35	A5fld9_17	IAA
3.33333	9.003	A5fld9_17	IAA
3.5	12.515	A5fld9_17	IAA
3.66667	7.006	A5fld9_17	IAA
3.83333	6.833	A5fld9_17	IAA
4	9.922	A5fld9_17	IAA
4.16667	5.019	A5fld9_17	IAA
4.33333	5.064	A5fld9_17	IAA
4.5	4.07	A5fld9_17	IAA
4.66667	6.959	A5fld9_17	IAA
4.83333	11.66	A5fld9_17	IAA
0	107.331	A5fld9_18	IAA
0.166667	87.206	A5fld9_18	IAA
0.333333	65.27	A5fld9_18	IAA
0.5	38.073	A5fld9_18	IAA
0.666667	13.466	A5fld9_18	IAA
0.833333	16.282	A5fld9_18	IAA
1	14.849	A5fld9_18	IAA
1.16667	7.303	A5fld9_18	IAA
1.33333	7.304	A5fld9_18	IAA
1.5	8.471	A5fld9_18	IAA
1.66667	5.103	A5fld9_18	IAA
1.83333	6.846	A5fld9_18	IAA
2	10.649	A5fld9_18	IAA
2.16667	12.3	A5fld9_18	IAA
2.33333	9.118	A5fld9_18	IAA
2.5	5.792	A5fld9_18	IAA
2.66667	9.555	A5fld9_18	IAA
2.83333	4.585	A5fld9_18	IAA
3	-0.805	A5fld9_18	IAA
3.16667	6.647	A5fld9_18	IAA
3.33333	5.367	A5fld9_18	IAA
3.5	7.163	A5fld9_18	IAA
3.66667	9.794	A5fld9_18	IAA
3.83333	8.868	A5fld9_18	IAA
4	4.815	A5fld9_18	IAA
4.16667	5.579	A5fld9_18	IAA
4.33333	4.706	A5fld9_18	IAA
4.5	7.453	A5fld9_18	IAA
4.66667	7.051	A5fld9_18	IAA
4.83333	8.569	A5fld9_18	IAA
0	22.112	A5fld9_19	IAA
0.166667	26.044	A5fld9_19	IAA
0.333333	4.985	A5fld9_19	IAA
0.5	4.335	A5fld9_19	IAA
0.666667	2.254	A5fld9_19	IAA
0.833333	5.225	A5fld9_19	IAA
1	2.985	A5fld9_19	IAA
1.16667	-0.937	A5fld9_19	IAA
1.33333	5.709	A5fld9_19	IAA
1.5	5.062	A5fld9_19	IAA
1.66667	7.54	A5fld9_19	IAA
1.83333	0.516	A5fld9_19	IAA
2	4.858	A5fld9_19	IAA
2.16667	7.198	A5fld9_19	IAA
2.33333	6.435	A5fld9_19	IAA
2.5	0.764	A5fld9_19	IAA
2.66667	4.935	A5fld9_19	IAA
2.83333	9.262	A5fld9_19	IAA
3	1.71	A5fld9_19	IAA
3.16667	0.812	A5fld9_19	IAA
3.33333	5.493	A5fld9_19	IAA
3.5	6.562	A5fld9_19	IAA
3.66667	8.708	A5fld9_19	IAA
3.83333	2.707	A5fld9_19	IAA
4	5.201	A5fld9_19	IAA
4.16667	6.275	A5fld9_19	IAA
4.33333	3.785	A5fld9_19	IAA
4.5	3.08	A5fld9_19	IAA
4.66667	2.858	A5fld9_19	IAA
4.83333	4.303	A5fld9_19	IAA
0	30.837	A5fld9_20	IAA
0.166667	33.677	A5fld9_20	IAA
0.333333	16.871	A5fld9_20	IAA
0.5	7.908	A5fld9_20	IAA
0.666667	6.454	A5fld9_20	IAA
0.833333	8.01	A5fld9_20	IAA
1	7.324	A5fld9_20	IAA
1.16667	3.316	A5fld9_20	IAA
1.33333	9.801	A5fld9_20	IAA
1.5	7.35	A5fld9_20	IAA
1.66667	10.97	A5fld9_20	IAA
1.83333	9.146	A5fld9_20	IAA
2	7.95	A5fld9_20	IAA
2.16667	3.939	A5fld9_20	IAA
2.33333	6.846	A5fld9_20	IAA
2.5	6.099	A5fld9_20	IAA
2.66667	6.745	A5fld9_20	IAA
2.83333	4.351	A5fld9_20	IAA
3	6.824	A5fld9_20	IAA
3.16667	3.274	A5fld9_20	IAA
3.33333	9.082	A5fld9_20	IAA
3.5	6.05	A5fld9_20	IAA
3.66667	7.252	A5fld9_20	IAA
3.83333	3.419	A5fld9_20	IAA
4	6.4	A5fld9_20	IAA
4.16667	8.25	A5fld9_20	IAA
4.33333	3.624	A5fld9_20	IAA
4.5	7.659	A5fld9_20	IAA
4.66667	2.988	A5fld9_20	IAA
4.83333	3.543	A5fld9_20	IAA
0	48.843	A5fld9_21	IAA
0.166667	37.022	A5fld9_21	IAA
0.333333	19.71	A5fld9_21	IAA
0.5	7.332	A5fld9_21	IAA
0.666667	3.609	A5fld9_21	IAA
0.833333	3.143	A5fld9_21	IAA
1	5.532	A5fld9_21	IAA
1.16667	3.74	A5fld9_21	IAA
1.33333	8.535	A5fld9_21	IAA
1.5	9.442	A5fld9_21	IAA
1.66667	2.768	A5fld9_21	IAA
1.83333	8.399	A5fld9_21	IAA
2	2.162	A5fld9_21	IAA
2.16667	8.888	A5fld9_21	IAA
2.33333	1.511	A5fld9_21	IAA
2.5	2.428	A5fld9_21	IAA
2.66667	5.483	A5fld9_21	IAA
2.83333	7.259	A5fld9_21	IAA
3	6.153	A5fld9_21	IAA
3.16667	3.258	A5fld9_21	IAA
3.33333	4.221	A5fld9_21	IAA
3.5	5.872	A5fld9_21	IAA
3.66667	7.585	A5fld9_21	IAA
3.83333	0.912	A5fld9_21	IAA
4	3.634	A5fld9_21	IAA
4.16667	3.614	A5fld9_21	IAA
4.33333	6.165	A5fld9_21	IAA
4.5	4.017	A5fld9_21	IAA
4.66667	7.07	A5fld9_21	IAA
4.83333	5.217	A5fld9_21	IAA
0	52.593	A5fld9_22	IAA
0.166667	46.187	A5fld9_22	IAA
0.333333	17.732	A5fld9_22	IAA
0.5	10.503	A5fld9_22	IAA
0.666667	7.276	A5fld9_22	IAA
0.833333	17.614	A5fld9_22	IAA
1	3.659	A5fld9_22	IAA
1.16667	6.759	A5fld9_22	IAA
1.33333	9.965	A5fld9_22	IAA
1.5	8.436	A5fld9_22	IAA
1.66667	10.29	A5fld9_22	IAA
1.83333	6.428	A5fld9_22	IAA
2	9.396	A5fld9_22	IAA
2.16667	16.17	A5fld9_22	IAA
2.33333	11.982	A5fld9_22	IAA
2.5	15.59	A5fld9_22	IAA
2.66667	12.074	A5fld9_22	IAA
2.83333	19.708	A5fld9_22	IAA
3	18.619	A5fld9_22	IAA
3.16667	11.616	A5fld9_22	IAA
3.33333	23.528	A5fld9_22	IAA
3.5	14.565	A5fld9_22	IAA
3.66667	15.591	A5fld9_22	IAA
3.83333	7.32	A5fld9_22	IAA
4	6.584	A5fld9_22	IAA
4.16667	8.342	A5fld9_22	IAA
4.33333	6.507	A5fld9_22	IAA
4.5	5.007	A5fld9_22	IAA
4.66667	7.966	A5fld9_22	IAA
4.83333	7.591	A5fld9_22	IAA
0	75.9	A5fld9_23	IAA
0.166667	67.886	A5fld9_23	IAA
0.333333	59.305	A5fld9_23	IAA
0.5	33.94	A5fld9_23	IAA
0.666667	15.678	A5fld9_23	IAA
0.833333	11.576	A5fld9_23	IAA
1	6.191	A5fld9_23	IAA
1.16667	7.962	A5fld9_23	IAA
1.33333	10.956	A5fld9_23	IAA
1.5	4.467	A5fld9_23	IAA
1.66667	6.344	A5fld9_23	IAA
1.83333	8.102	A5fld9_23	IAA
2	9.443	A5fld9_23	IAA
2.16667	10.227	A5fld9_23	IAA
2.33333	9.634	A5fld9_23	IAA
2.5	9.805	A5fld9_23	IAA
2.66667	11.299	A5fld9_23	IAA
2.83333	2.205	A5fld9_23	IAA
3	4.884	A5fld9_23	IAA
3.16667	6.445	A5fld9_23	IAA
3.33333	9.579	A5fld9_23	IAA
3.5	6.173	A5fld9_23	IAA
3.66667	6.107	A5fld9_23	IAA
3.83333	1.858	A5fld9_23	IAA
4	8.906	A5fld9_23	IAA
4.16667	4.908	A5fld9_23	IAA
4.33333	8.63	A5fld9_23	IAA
4.5	6.352	A5fld9_23	IAA
4.66667	5.349	A5fld9_23	IAA
4.83333	6.211	A5fld9_23	IAA
0	56.942	A5fld9_24	IAA
0.166667	62.978	A5fld9_24	IAA
0.333333	33.358	A5fld9_24	IAA
0.5	22.737	A5fld9_24	IAA
0.666667	4.207	A5fld9_24	IAA
0.833333	6.823	A5fld9_24	IAA
1	14.994	A5fld9_24	IAA
1.16667	9.148	A5fld9_24	IAA
1.33333	9.658	A5fld9_24	IAA
1.5	9.41	A5fld9_24	IAA
1.66667	3.395	A5fld9_24	IAA
1.83333	2.89	A5fld9_24	IAA
2	0.105	A5fld9_24	IAA
2.16667	9.483	A5fld9_24	IAA
2.33333	7.682	A5fld9_24	IAA
2.5	5.878	A5fld9_24	IAA
2.66667	6.837	A5fld9_24	IAA
2.83333	8.085	A5fld9_24	IAA
3	4.954	A5fld9_24	IAA
3.16667	7.372	A5fld9_24	IAA
3.33333	6.288	A5fld9_24	IAA
3.5	9.787	A5fld9_24	IAA
3.66667	4.866	A5fld9_24	IAA
3.83333	0.586	A5fld9_24	IAA
4	5.948	A5fld9_24	IAA
4.16667	7.731	A5fld9_24	IAA
4.33333	9.269	A5fld9_24	IAA
4.5	2.365	A5fld9_24	IAA
4.66667	8.39	A5fld9_24	IAA
4.83333	13.22	A5fld9_24	IAA
0	99.037	A5fld9_25	IAA
0.166667	98.193	A5fld9_25	IAA
0.333333	60.947	A5fld9_25	IAA
0.5	38.108	A5fld9_25	IAA
0.666667	10.08	A5fld9_25	IAA
0.833333	11.209	A5fld9_25	IAA
1	13.045	A5fld9_25	IAA
1.16667	11.94	A5fld9_25	IAA
1.33333	8.896	A5fld9_25	IAA
1.5	11.793	A5fld9_25	IAA
1.66667	9.556	A5fld9_25	IAA
1.83333	19.713	A5fld9_25	IAA
2	14.453	A5fld9_25	IAA
2.16667	16.515	A5fld9_25	IAA
2.33333	16.438	A5fld9_25	IAA
2.5	10.726	A5fld9_25	IAA
2.66667	10.385	A5fld9_25	IAA
2.83333	10.547	A5fld9_25	IAA
3	3.793	A5fld9_25	IAA
3.16667	11.179	A5fld9_25	IAA
3.33333	17.636	A5fld9_25	IAA
3.5	10.898	A5fld9_25	IAA
3.66667	10.708	A5fld9_25	IAA
3.83333	6.662	A5fld9_25	IAA
4	11.454	A5fld9_25	IAA
4.16667	9.098	A5fld9_25	IAA
4.33333	10.842	A5fld9_25	IAA
4.5	3.07	A5fld9_25	IAA
4.66667	2.871	A5fld9_25	IAA
4.83333	8.819	A5fld9_25	IAA
0	100.173	A5fld9_26	IAA
0.166667	76.228	A5fld9_26	IAA
0.333333	57.953	A5fld9_26	IAA
0.5	62.193	A5fld9_26	IAA
0.666667	38.153	A5fld9_26	IAA
0.833333	26.456	A5fld9_26	IAA
1	10.235	A5fld9_26	IAA
1.16667	8.341	A5fld9_26	IAA
1.33333	11.418	A5fld9_26	IAA
1.5	14.138	A5fld9_26	IAA
1.66667	6.338	A5fld9_26	IAA
1.83333	9.396	A5fld9_26	IAA
2	10.358	A5fld9_26	IAA
2.16667	8.35	A5fld9_26	IAA
2.33333	10.027	A5fld9_26	IAA
2.5	9.71	A5fld9_26	IAA
2.66667	5.166	A5fld9_26	IAA
2.83333	14.461	A5fld9_26	IAA
3	7.09	A5fld9_26	IAA
3.16667	6.505	A5fld9_26	IAA
3.33333	7.269	A5fld9_26	IAA
3.5	1.752	A5fld9_26	IAA
3.66667	1.167	A5fld9_26	IAA
3.83333	6.988	A5fld9_26	IAA
4	6.916	A5fld9_26	IAA
4.16667	28.174	A5fld9_26	IAA
4.33333	22.282	A5fld9_26	IAA
4.5	20.77	A5fld9_26	IAA
4.66667	32.029	A5fld9_26	IAA
4.83333	19.489	A5fld9_26	IAA
0	98.388	A5fld9_27	IAA
0.166667	84.801	A5fld9_27	IAA
0.333333	48.738	A5fld9_27	IAA
0.5	14.108	A5fld9_27	IAA
0.666667	8.624	A5fld9_27	IAA
0.833333	5.175	A5fld9_27	IAA
1	4.004	A5fld9_27	IAA
1.16667	4.228	A5fld9_27	IAA
1.33333	10.041	A5fld9_27	IAA
1.5	13.784	A5fld9_27	IAA
1.66667	5.828	A5fld9_27	IAA
1.83333	9.716	A5fld9_27	IAA
2	7.295	A5fld9_27	IAA
2.16667	10.49	A5fld9_27	IAA
2.33333	6.865	A5fld9_27	IAA
2.5	3.982	A5fld9_27	IAA
2.66667	11.945	A5fld9_27	IAA
2.83333	6.072	A5fld9_27	IAA
3	8.733	A5fld9_27	IAA
3.16667	7.34	A5fld9_27	IAA
3.33333	11.383	A5fld9_27	IAA
3.5	2.024	A5fld9_27	IAA
3.66667	10.129	A5fld9_27	IAA
3.83333	6.225	A5fld9_27	IAA
4	7.001	A5fld9_27	IAA
4.16667	7.117	A5fld9_27	IAA
4.33333	9.564	A5fld9_27	IAA
4.5	8.428	A5fld9_27	IAA
4.66667	5.295	A5fld9_27	IAA
4.83333	0.765	A5fld9_27	IAA
0	6.873	A4fld3_merge2_1	Washout
0.166667	4.073	A4fld3_merge2_1	Washout
0.333333	10.106	A4fld3_merge2_1	Washout
0.5	11.984	A4fld3_merge2_1	Washout
0.666667	17.318	A4fld3_merge2_1	Washout
0.833333	18.996	A4fld3_merge2_1	Washout
1	14.219	A4fld3_merge2_1	Washout
1.16667	17.408	A4fld3_merge2_1	Washout
1.33333	16.6	A4fld3_merge2_1	Washout
1.5	19.53	A4fld3_merge2_1	Washout
1.66667	13.739	A4fld3_merge2_1	Washout
1.83333	22.264	A4fld3_merge2_1	Washout
2	20.439	A4fld3_merge2_1	Washout
2.16667	27.7	A4fld3_merge2_1	Washout
2.33333	33.249	A4fld3_merge2_1	Washout
2.5	26.997	A4fld3_merge2_1	Washout
2.66667	33.186	A4fld3_merge2_1	Washout
2.83333	35.09	A4fld3_merge2_1	Washout
3	35.492	A4fld3_merge2_1	Washout
3.16667	33.119	A4fld3_merge2_1	Washout
3.33333	33.051	A4fld3_merge2_1	Washout
3.5	40.325	A4fld3_merge2_1	Washout
3.66667	41.863	A4fld3_merge2_1	Washout
3.83333	58.572	A4fld3_merge2_1	Washout
4	56.178	A4fld3_merge2_1	Washout
4.16667	62.103	A4fld3_merge2_1	Washout
4.33333	57.387	A4fld3_merge2_1	Washout
4.5	53.176	A4fld3_merge2_1	Washout
4.66667	62.944	A4fld3_merge2_1	Washout
4.83333	57.323	A4fld3_merge2_1	Washout
0	7.031	A4fld3_merge2_2	Washout
0.166667	8.323	A4fld3_merge2_2	Washout
0.333333	14.236	A4fld3_merge2_2	Washout
0.5	18.079	A4fld3_merge2_2	Washout
0.666667	17.267	A4fld3_merge2_2	Washout
0.833333	21.973	A4fld3_merge2_2	Washout
1	13.826	A4fld3_merge2_2	Washout
1.16667	18.133	A4fld3_merge2_2	Washout
1.33333	19.872	A4fld3_merge2_2	Washout
1.5	25.325	A4fld3_merge2_2	Washout
1.66667	21.992	A4fld3_merge2_2	Washout
1.83333	23.695	A4fld3_merge2_2	Washout
2	33.113	A4fld3_merge2_2	Washout
2.16667	37.083	A4fld3_merge2_2	Washout
2.33333	33.787	A4fld3_merge2_2	Washout
2.5	52.93	A4fld3_merge2_2	Washout
2.66667	50.98	A4fld3_merge2_2	Washout
2.83333	53.333	A4fld3_merge2_2	Washout
3	51.008	A4fld3_merge2_2	Washout
3.16667	57.176	A4fld3_merge2_2	Washout
3.33333	60.864	A4fld3_merge2_2	Washout
3.5	61.109	A4fld3_merge2_2	Washout
3.66667	70.116	A4fld3_merge2_2	Washout
3.83333	69.493	A4fld3_merge2_2	Washout
4	69.697	A4fld3_merge2_2	Washout
4.16667	65.005	A4fld3_merge2_2	Washout
4.33333	69.988	A4fld3_merge2_2	Washout
4.5	74.569	A4fld3_merge2_2	Washout
4.66667	81.902	A4fld3_merge2_2	Washout
4.83333	81.671	A4fld3_merge2_2	Washout
0	7.107	A4fld3_merge2_3	Washout
0.166667	4.563	A4fld3_merge2_3	Washout
0.333333	8.47	A4fld3_merge2_3	Washout
0.5	5.117	A4fld3_merge2_3	Washout
0.666667	5.935	A4fld3_merge2_3	Washout
0.833333	4.752	A4fld3_merge2_3	Washout
1	10.456	A4fld3_merge2_3	Washout
1.16667	9.136	A4fld3_merge2_3	Washout
1.33333	5.486	A4fld3_merge2_3	Washout
1.5	8.739	A4fld3_merge2_3	Washout
1.66667	11.492	A4fld3_merge2_3	Washout
1.83333	15.903	A4fld3_merge2_3	Washout
2	13.762	A4fld3_merge2_3	Washout
2.16667	16.339	A4fld3_merge2_3	Washout
2.33333	12.945	A4fld3_merge2_3	Washout
2.5	15.75	A4fld3_merge2_3	Washout
2.66667	16.515	A4fld3_merge2_3	Washout
2.83333	16.802	A4fld3_merge2_3	Washout
3	17.384	A4fld3_merge2_3	Washout
3.16667	22.777	A4fld3_merge2_3	Washout
3.33333	16.225	A4fld3_merge2_3	Washout
3.5	24.499	A4fld3_merge2_3	Washout
3.66667	28.214	A4fld3_merge2_3	Washout
3.83333	31.012	A4fld3_merge2_3	Washout
4	29.185	A4fld3_merge2_3	Washout
4.16667	29.154	A4fld3_merge2_3	Washout
4.33333	35.194	A4fld3_merge2_3	Washout
4.5	31.458	A4fld3_merge2_3	Washout
4.66667	41.836	A4fld3_merge2_3	Washout
4.83333	27.14	A4fld3_merge2_3	Washout
0	11.009	A4fld3_merge2_4	Washout
0.166667	4.51	A4fld3_merge2_4	Washout
0.333333	2.537	A4fld3_merge2_4	Washout
0.5	4.7	A4fld3_merge2_4	Washout
0.666667	7.561	A4fld3_merge2_4	Washout
0.833333	10.553	A4fld3_merge2_4	Washout
1	17.529	A4fld3_merge2_4	Washout
1.16667	23.047	A4fld3_merge2_4	Washout
1.33333	21.204	A4fld3_merge2_4	Washout
1.5	25.341	A4fld3_merge2_4	Washout
1.66667	26.194	A4fld3_merge2_4	Washout
1.83333	32.21	A4fld3_merge2_4	Washout
2	29.505	A4fld3_merge2_4	Washout
2.16667	37.937	A4fld3_merge2_4	Washout
2.33333	43.35	A4fld3_merge2_4	Washout
2.5	45.259	A4fld3_merge2_4	Washout
2.66667	53.024	A4fld3_merge2_4	Washout
2.83333	62.726	A4fld3_merge2_4	Washout
3	55.065	A4fld3_merge2_4	Washout
3.16667	58.033	A4fld3_merge2_4	Washout
3.33333	59.117	A4fld3_merge2_4	Washout
3.5	74.366	A4fld3_merge2_4	Washout
3.66667	81.278	A4fld3_merge2_4	Washout
3.83333	83.066	A4fld3_merge2_4	Washout
4	79.71	A4fld3_merge2_4	Washout
4.16667	77.54	A4fld3_merge2_4	Washout
4.33333	81.197	A4fld3_merge2_4	Washout
4.5	84.774	A4fld3_merge2_4	Washout
4.66667	96.095	A4fld3_merge2_4	Washout
4.83333	-1.202	A4fld3_merge2_4	Washout
0	12.592	A4fld3_merge2_5	Washout
0.166667	13.605	A4fld3_merge2_5	Washout
0.333333	12.021	A4fld3_merge2_5	Washout
0.5	8.26	A4fld3_merge2_5	Washout
0.666667	16.729	A4fld3_merge2_5	Washout
0.833333	22.511	A4fld3_merge2_5	Washout
1	22.842	A4fld3_merge2_5	Washout
1.16667	31.006	A4fld3_merge2_5	Washout
1.33333	43.508	A4fld3_merge2_5	Washout
1.5	37.907	A4fld3_merge2_5	Washout
1.66667	31.938	A4fld3_merge2_5	Washout
1.83333	45.717	A4fld3_merge2_5	Washout
2	50.936	A4fld3_merge2_5	Washout
2.16667	50.782	A4fld3_merge2_5	Washout
2.33333	56.122	A4fld3_merge2_5	Washout
2.5	49.088	A4fld3_merge2_5	Washout
2.66667	58.03	A4fld3_merge2_5	Washout
2.83333	67.181	A4fld3_merge2_5	Washout
3	78.062	A4fld3_merge2_5	Washout
3.16667	70.125	A4fld3_merge2_5	Washout
3.33333	73.285	A4fld3_merge2_5	Washout
3.5	69.122	A4fld3_merge2_5	Washout
3.66667	75.629	A4fld3_merge2_5	Washout
3.83333	73.414	A4fld3_merge2_5	Washout
4	79.738	A4fld3_merge2_5	Washout
4.16667	92.204	A4fld3_merge2_5	Washout
4.33333	89.659	A4fld3_merge2_5	Washout
4.5	84.85	A4fld3_merge2_5	Washout
4.66667	97.697	A4fld3_merge2_5	Washout
4.83333	89.877	A4fld3_merge2_5	Washout
0	7.082	A4fld3_merge2_6	Washout
0.166667	7.766	A4fld3_merge2_6	Washout
0.333333	-3.024	A4fld3_merge2_6	Washout
0.5	7.519	A4fld3_merge2_6	Washout
0.666667	5.447	A4fld3_merge2_6	Washout
0.833333	9.761	A4fld3_merge2_6	Washout
1	7.298	A4fld3_merge2_6	Washout
1.16667	10.959	A4fld3_merge2_6	Washout
1.33333	9.565	A4fld3_merge2_6	Washout
1.5	12.53	A4fld3_merge2_6	Washout
1.66667	14.34	A4fld3_merge2_6	Washout
1.83333	20.195	A4fld3_merge2_6	Washout
2	13.461	A4fld3_merge2_6	Washout
2.16667	19.165	A4fld3_merge2_6	Washout
2.33333	24.986	A4fld3_merge2_6	Washout
2.5	28.49	A4fld3_merge2_6	Washout
2.66667	29.803	A4fld3_merge2_6	Washout
2.83333	28.773	A4fld3_merge2_6	Washout
3	28.771	A4fld3_merge2_6	Washout
3.16667	36.726	A4fld3_merge2_6	Washout
3.33333	30.88	A4fld3_merge2_6	Washout
3.5	28.385	A4fld3_merge2_6	Washout
3.66667	35.645	A4fld3_merge2_6	Washout
3.83333	39.091	A4fld3_merge2_6	Washout
4	38.295	A4fld3_merge2_6	Washout
4.16667	39.774	A4fld3_merge2_6	Washout
4.33333	41.137	A4fld3_merge2_6	Washout
4.5	42.844	A4fld3_merge2_6	Washout
4.66667	44.703	A4fld3_merge2_6	Washout
4.83333	44.061	A4fld3_merge2_6	Washout
0	8.706	A4fld4_1	Washout
0.166667	6.353	A4fld4_1	Washout
0.333333	12.091	A4fld4_1	Washout
0.5	10.414	A4fld4_1	Washout
0.666667	15.846	A4fld4_1	Washout
0.833333	18.818	A4fld4_1	Washout
1	21.918	A4fld4_1	Washout
1.16667	22.946	A4fld4_1	Washout
1.33333	27.626	A4fld4_1	Washout
1.5	22.055	A4fld4_1	Washout
1.66667	20.499	A4fld4_1	Washout
1.83333	31.482	A4fld4_1	Washout
2	35.713	A4fld4_1	Washout
2.16667	29.977	A4fld4_1	Washout
2.33333	38.068	A4fld4_1	Washout
2.5	35.287	A4fld4_1	Washout
2.66667	41.214	A4fld4_1	Washout
2.83333	40.189	A4fld4_1	Washout
3	45.164	A4fld4_1	Washout
3.16667	45.95	A4fld4_1	Washout
3.33333	50.196	A4fld4_1	Washout
3.5	60.224	A4fld4_1	Washout
3.66667	46.829	A4fld4_1	Washout
3.83333	48.354	A4fld4_1	Washout
4	56.556	A4fld4_1	Washout
4.16667	56.648	A4fld4_1	Washout
4.33333	50.826	A4fld4_1	Washout
4.5	49.592	A4fld4_1	Washout
4.66667	74.783	A4fld4_1	Washout
4.83333	67.64	A4fld4_1	Washout
0	7.349	A4fld4_2	Washout
0.166667	3.701	A4fld4_2	Washout
0.333333	3.157	A4fld4_2	Washout
0.5	3.746	A4fld4_2	Washout
0.666667	5.963	A4fld4_2	Washout
0.833333	10.143	A4fld4_2	Washout
1	15.013	A4fld4_2	Washout
1.16667	12.418	A4fld4_2	Washout
1.33333	25.139	A4fld4_2	Washout
1.5	19.068	A4fld4_2	Washout
1.66667	30.549	A4fld4_2	Washout
1.83333	31.554	A4fld4_2	Washout
2	30.475	A4fld4_2	Washout
2.16667	36.154	A4fld4_2	Washout
2.33333	42.435	A4fld4_2	Washout
2.5	47.211	A4fld4_2	Washout
2.66667	43.726	A4fld4_2	Washout
2.83333	50.587	A4fld4_2	Washout
3	46.854	A4fld4_2	Washout
3.16667	56.228	A4fld4_2	Washout
3.33333	54.278	A4fld4_2	Washout
3.5	54.382	A4fld4_2	Washout
3.66667	50.288	A4fld4_2	Washout
3.83333	62.339	A4fld4_2	Washout
4	58.464	A4fld4_2	Washout
4.16667	77.553	A4fld4_2	Washout
4.33333	64.826	A4fld4_2	Washout
4.5	70.111	A4fld4_2	Washout
4.66667	75.707	A4fld4_2	Washout
4.83333	76.837	A4fld4_2	Washout
0	4.966	A4fld4_3	Washout
0.166667	8.597	A4fld4_3	Washout
0.333333	4.698	A4fld4_3	Washout
0.5	14.886	A4fld4_3	Washout
0.666667	5.536	A4fld4_3	Washout
0.833333	13.023	A4fld4_3	Washout
1	11.909	A4fld4_3	Washout
1.16667	9.535	A4fld4_3	Washout
1.33333	15.98	A4fld4_3	Washout
1.5	17.584	A4fld4_3	Washout
1.66667	19.056	A4fld4_3	Washout
1.83333	19.054	A4fld4_3	Washout
2	20.824	A4fld4_3	Washout
2.16667	24.435	A4fld4_3	Washout
2.33333	28.122	A4fld4_3	Washout
2.5	27.952	A4fld4_3	Washout
2.66667	36.28	A4fld4_3	Washout
2.83333	34.135	A4fld4_3	Washout
3	38.819	A4fld4_3	Washout
3.16667	48.51	A4fld4_3	Washout
3.33333	56.234	A4fld4_3	Washout
3.5	47.816	A4fld4_3	Washout
3.66667	42.765	A4fld4_3	Washout
3.83333	55.165	A4fld4_3	Washout
4	57.651	A4fld4_3	Washout
4.16667	63.098	A4fld4_3	Washout
4.33333	69.807	A4fld4_3	Washout
4.5	77.63	A4fld4_3	Washout
4.66667	78.296	A4fld4_3	Washout
4.83333	106.194	A4fld4_3	Washout
4.83333	-0.66	A4fld4_4	Washout
0	18.71	A4fld4_5	Washout
0.166667	20.726	A4fld4_5	Washout
0.333333	22.6	A4fld4_5	Washout
0.5	20.987	A4fld4_5	Washout
0.666667	20.327	A4fld4_5	Washout
0.833333	19.514	A4fld4_5	Washout
1	15.646	A4fld4_5	Washout
1.16667	14.136	A4fld4_5	Washout
1.33333	22.31	A4fld4_5	Washout
1.5	25.163	A4fld4_5	Washout
1.66667	30.195	A4fld4_5	Washout
1.83333	30.966	A4fld4_5	Washout
2	40.58	A4fld4_5	Washout
2.16667	42.958	A4fld4_5	Washout
2.33333	38.692	A4fld4_5	Washout
2.5	45.186	A4fld4_5	Washout
2.66667	52.35	A4fld4_5	Washout
2.83333	60.1	A4fld4_5	Washout
3	52.059	A4fld4_5	Washout
3.16667	73.086	A4fld4_5	Washout
3.33333	72.446	A4fld4_5	Washout
3.5	71.044	A4fld4_5	Washout
3.66667	70.05	A4fld4_5	Washout
3.83333	73.956	A4fld4_5	Washout
4	90.575	A4fld4_5	Washout
4.16667	84.436	A4fld4_5	Washout
4.33333	74.468	A4fld4_5	Washout
4.5	94.063	A4fld4_5	Washout
4.66667	108.217	A4fld4_5	Washout
4.83333	85.726	A4fld4_5	Washout
0	1.811	A4fld4_6	Washout
0.166667	9.748	A4fld4_6	Washout
0.333333	8.654	A4fld4_6	Washout
0.5	6.911	A4fld4_6	Washout
0.666667	9.656	A4fld4_6	Washout
0.833333	12.925	A4fld4_6	Washout
1	9.991	A4fld4_6	Washout
1.16667	14.079	A4fld4_6	Washout
1.33333	20.034	A4fld4_6	Washout
1.5	23.223	A4fld4_6	Washout
1.66667	15.828	A4fld4_6	Washout
1.83333	19.064	A4fld4_6	Washout
2	20.899	A4fld4_6	Washout
2.16667	32.268	A4fld4_6	Washout
2.33333	29.59	A4fld4_6	Washout
2.5	28.898	A4fld4_6	Washout
2.66667	30.704	A4fld4_6	Washout
2.83333	32.182	A4fld4_6	Washout
3	28.417	A4fld4_6	Washout
3.16667	30.994	A4fld4_6	Washout
3.33333	39.968	A4fld4_6	Washout
3.5	41.958	A4fld4_6	Washout
3.66667	35.196	A4fld4_6	Washout
3.83333	40.798	A4fld4_6	Washout
4	37.575	A4fld4_6	Washout
4.16667	36.202	A4fld4_6	Washout
4.33333	38.212	A4fld4_6	Washout
4.5	28.471	A4fld4_6	Washout
4.66667	32.03	A4fld4_6	Washout
4.83333	29.004	A4fld4_6	Washout
0	12.422	A4fld4_7	Washout
0.166667	19.948	A4fld4_7	Washout
0.333333	27.958	A4fld4_7	Washout
0.5	16.392	A4fld4_7	Washout
0.666667	8.229	A4fld4_7	Washout
0.833333	12.052	A4fld4_7	Washout
1	12.317	A4fld4_7	Washout
1.16667	7.456	A4fld4_7	Washout
1.33333	8.297	A4fld4_7	Washout
1.5	6.995	A4fld4_7	Washout
1.66667	14.79	A4fld4_7	Washout
1.83333	2.153	A4fld4_7	Washout
2	11.488	A4fld4_7	Washout
2.16667	8.461	A4fld4_7	Washout
2.33333	5.929	A4fld4_7	Washout
2.5	9.717	A4fld4_7	Washout
2.66667	15.53	A4fld4_7	Washout
2.83333	12.701	A4fld4_7	Washout
3	14.876	A4fld4_7	Washout
3.16667	15.997	A4fld4_7	Washout
3.33333	15.211	A4fld4_7	Washout
3.5	21.569	A4fld4_7	Washout
3.66667	14.145	A4fld4_7	Washout
3.83333	18.351	A4fld4_7	Washout
4	20.718	A4fld4_7	Washout
4.16667	17.17	A4fld4_7	Washout
4.33333	23.576	A4fld4_7	Washout
4.5	22.383	A4fld4_7	Washout
4.66667	17.176	A4fld4_7	Washout
4.83333	19.504	A4fld4_7	Washout
0	18.646	A4fld4_8	Washout
0.166667	11.679	A4fld4_8	Washout
0.333333	19.059	A4fld4_8	Washout
0.5	17.996	A4fld4_8	Washout
0.666667	9.232	A4fld4_8	Washout
0.833333	10.017	A4fld4_8	Washout
1	7.039	A4fld4_8	Washout
1.16667	2.202	A4fld4_8	Washout
1.33333	8.11	A4fld4_8	Washout
1.5	8.916	A4fld4_8	Washout
1.66667	10.951	A4fld4_8	Washout
1.83333	1.785	A4fld4_8	Washout
2	11.694	A4fld4_8	Washout
2.16667	10.068	A4fld4_8	Washout
2.33333	11.002	A4fld4_8	Washout
2.5	5.224	A4fld4_8	Washout
2.66667	9.872	A4fld4_8	Washout
2.83333	6.502	A4fld4_8	Washout
3	9.293	A4fld4_8	Washout
3.16667	11.541	A4fld4_8	Washout
3.33333	12.101	A4fld4_8	Washout
3.5	10.49	A4fld4_8	Washout
3.66667	10.642	A4fld4_8	Washout
3.83333	11.57	A4fld4_8	Washout
4	8.034	A4fld4_8	Washout
4.16667	10.604	A4fld4_8	Washout
4.33333	15.123	A4fld4_8	Washout
4.5	13.038	A4fld4_8	Washout
4.66667	20.296	A4fld4_8	Washout
4.83333	14.261	A4fld4_8	Washout
0	8.162	A4fld4_9	Washout
0.166667	9.565	A4fld4_9	Washout
0.333333	17.502	A4fld4_9	Washout
0.5	9.841	A4fld4_9	Washout
0.666667	9.998	A4fld4_9	Washout
0.833333	20.143	A4fld4_9	Washout
1	16.868	A4fld4_9	Washout
1.16667	15.139	A4fld4_9	Washout
1.33333	22.442	A4fld4_9	Washout
1.5	26.046	A4fld4_9	Washout
1.66667	20.59	A4fld4_9	Washout
1.83333	27.922	A4fld4_9	Washout
2	25.574	A4fld4_9	Washout
2.16667	33.856	A4fld4_9	Washout
2.33333	35.768	A4fld4_9	Washout
2.5	41.971	A4fld4_9	Washout
2.66667	49.046	A4fld4_9	Washout
2.83333	42.223	A4fld4_9	Washout
3	48.449	A4fld4_9	Washout
3.16667	50.706	A4fld4_9	Washout
3.33333	50.572	A4fld4_9	Washout
3.5	49.537	A4fld4_9	Washout
3.66667	61.047	A4fld4_9	Washout
3.83333	52.674	A4fld4_9	Washout
4	48.61	A4fld4_9	Washout
4.16667	50.541	A4fld4_9	Washout
4.33333	57.082	A4fld4_9	Washout
4.5	61.588	A4fld4_9	Washout
4.66667	66.881	A4fld4_9	Washout
4.83333	61.248	A4fld4_9	Washout
0	17.303	A4fld5_1	Washout
0.166667	20.021	A4fld5_1	Washout
0.333333	10.668	A4fld5_1	Washout
0.5	17.168	A4fld5_1	Washout
0.666667	13.754	A4fld5_1	Washout
0.833333	20.415	A4fld5_1	Washout
1	12.833	A4fld5_1	Washout
1.16667	20.308	A4fld5_1	Washout
1.33333	18.69	A4fld5_1	Washout
1.5	19.648	A4fld5_1	Washout
1.66667	21.616	A4fld5_1	Washout
1.83333	22.832	A4fld5_1	Washout
2	24.175	A4fld5_1	Washout
2.16667	24.625	A4fld5_1	Washout
2.33333	28.967	A4fld5_1	Washout
2.5	30.038	A4fld5_1	Washout
2.66667	32.351	A4fld5_1	Washout
2.83333	36.664	A4fld5_1	Washout
3	31.237	A4fld5_1	Washout
3.16667	41.865	A4fld5_1	Washout
3.33333	51.591	A4fld5_1	Washout
3.5	51.353	A4fld5_1	Washout
3.66667	51.288	A4fld5_1	Washout
3.83333	51.288	A4fld5_1	Washout
4	50.931	A4fld5_1	Washout
4.16667	53.912	A4fld5_1	Washout
4.33333	57.369	A4fld5_1	Washout
4.5	56.178	A4fld5_1	Washout
4.66667	62.257	A4fld5_1	Washout
4.83333	60.083	A4fld5_1	Washout
0	11.094	A4fld5_2	Washout
0.166667	6.701	A4fld5_2	Washout
0.333333	11.668	A4fld5_2	Washout
0.5	17.994	A4fld5_2	Washout
0.666667	7.045	A4fld5_2	Washout
0.833333	18.14	A4fld5_2	Washout
1	18.289	A4fld5_2	Washout
1.16667	30.703	A4fld5_2	Washout
1.33333	29.617	A4fld5_2	Washout
1.5	31.056	A4fld5_2	Washout
1.66667	31.891	A4fld5_2	Washout
1.83333	28.253	A4fld5_2	Washout
2	26.077	A4fld5_2	Washout
2.16667	30.793	A4fld5_2	Washout
2.33333	34.657	A4fld5_2	Washout
2.5	40.468	A4fld5_2	Washout
2.66667	41.794	A4fld5_2	Washout
2.83333	44.446	A4fld5_2	Washout
3	44.341	A4fld5_2	Washout
3.16667	45.362	A4fld5_2	Washout
3.33333	56.31	A4fld5_2	Washout
3.5	52.455	A4fld5_2	Washout
3.66667	53.579	A4fld5_2	Washout
3.83333	56.825	A4fld5_2	Washout
4	56.551	A4fld5_2	Washout
4.16667	70.399	A4fld5_2	Washout
4.33333	116.115	A4fld5_2	Washout
4.5	127.201	A4fld5_2	Washout
4.66667	140.029	A4fld5_2	Washout
4.83333	88.501	A4fld5_2	Washout
0	5.686	A4fld5_3	Washout
0.166667	0.012	A4fld5_3	Washout
0.333333	8.735	A4fld5_3	Washout
0.5	6.073	A4fld5_3	Washout
0.666667	7.229	A4fld5_3	Washout
0.833333	5.877	A4fld5_3	Washout
1	10.776	A4fld5_3	Washout
1.16667	13.393	A4fld5_3	Washout
1.33333	19.525	A4fld5_3	Washout
1.5	14.663	A4fld5_3	Washout
1.66667	15.265	A4fld5_3	Washout
1.83333	18.367	A4fld5_3	Washout
2	20.413	A4fld5_3	Washout
2.16667	30.689	A4fld5_3	Washout
2.33333	24.274	A4fld5_3	Washout
2.5	28.455	A4fld5_3	Washout
2.66667	25.582	A4fld5_3	Washout
2.83333	28.838	A4fld5_3	Washout
3	33.063	A4fld5_3	Washout
3.16667	34.419	A4fld5_3	Washout
3.33333	36.987	A4fld5_3	Washout
3.5	39.464	A4fld5_3	Washout
3.66667	39.25	A4fld5_3	Washout
3.83333	41.901	A4fld5_3	Washout
4	38.134	A4fld5_3	Washout
4.16667	42.102	A4fld5_3	Washout
4.33333	44.128	A4fld5_3	Washout
4.5	43.428	A4fld5_3	Washout
4.66667	36.783	A4fld5_3	Washout
4.83333	33.884	A4fld5_3	Washout
0	9.461	A4fld5_4	Washout
0.166667	7.103	A4fld5_4	Washout
0.333333	5.767	A4fld5_4	Washout
0.5	6.769	A4fld5_4	Washout
0.666667	7.077	A4fld5_4	Washout
0.833333	2.311	A4fld5_4	Washout
1	11.982	A4fld5_4	Washout
1.16667	9.612	A4fld5_4	Washout
1.33333	4.484	A4fld5_4	Washout
1.5	17.274	A4fld5_4	Washout
1.66667	10.556	A4fld5_4	Washout
1.83333	20.617	A4fld5_4	Washout
2	15.729	A4fld5_4	Washout
2.16667	16.831	A4fld5_4	Washout
2.33333	25.318	A4fld5_4	Washout
2.5	20.86	A4fld5_4	Washout
2.66667	17.474	A4fld5_4	Washout
2.83333	24.05	A4fld5_4	Washout
3	25.556	A4fld5_4	Washout
3.16667	28.087	A4fld5_4	Washout
3.33333	23.237	A4fld5_4	Washout
3.5	33.091	A4fld5_4	Washout
3.66667	29.817	A4fld5_4	Washout
3.83333	35.072	A4fld5_4	Washout
4	32.564	A4fld5_4	Washout
4.16667	38.098	A4fld5_4	Washout
4.33333	40.663	A4fld5_4	Washout
4.5	46.115	A4fld5_4	Washout
4.66667	54.919	A4fld5_4	Washout
4.83333	52.871	A4fld5_4	Washout
0	6.423	A4fld5_5	Washout
0.166667	6.363	A4fld5_5	Washout
0.333333	7.82	A4fld5_5	Washout
0.5	6.057	A4fld5_5	Washout
0.666667	7.568	A4fld5_5	Washout
0.833333	12.725	A4fld5_5	Washout
1	20.07	A4fld5_5	Washout
1.16667	17.624	A4fld5_5	Washout
1.33333	28.291	A4fld5_5	Washout
1.5	20.667	A4fld5_5	Washout
1.66667	24.534	A4fld5_5	Washout
1.83333	30.44	A4fld5_5	Washout
2	38.343	A4fld5_5	Washout
2.16667	42.977	A4fld5_5	Washout
2.33333	40.23	A4fld5_5	Washout
2.5	54.705	A4fld5_5	Washout
2.66667	44.674	A4fld5_5	Washout
2.83333	49.117	A4fld5_5	Washout
3	53.727	A4fld5_5	Washout
3.16667	55.574	A4fld5_5	Washout
3.33333	59.177	A4fld5_5	Washout
3.5	60.524	A4fld5_5	Washout
3.66667	66.494	A4fld5_5	Washout
3.83333	66.42	A4fld5_5	Washout
4	63.323	A4fld5_5	Washout
4.16667	74.728	A4fld5_5	Washout
4.33333	82.065	A4fld5_5	Washout
4.5	77.194	A4fld5_5	Washout
4.66667	74.726	A4fld5_5	Washout
4.83333	73.586	A4fld5_5	Washout
0	0.379	A4fld5_6	Washout
0.166667	0.274	A4fld5_6	Washout
0.333333	5.956	A4fld5_6	Washout
0.5	2.968	A4fld5_6	Washout
0.666667	7.919	A4fld5_6	Washout
0.833333	6.861	A4fld5_6	Washout
1	10.2	A4fld5_6	Washout
1.16667	13.118	A4fld5_6	Washout
1.33333	19.392	A4fld5_6	Washout
1.5	17.999	A4fld5_6	Washout
1.66667	22.812	A4fld5_6	Washout
1.83333	23.661	A4fld5_6	Washout
2	26.473	A4fld5_6	Washout
2.16667	26.66	A4fld5_6	Washout
2.33333	29.195	A4fld5_6	Washout
2.5	33.775	A4fld5_6	Washout
2.66667	27.838	A4fld5_6	Washout
2.83333	39.234	A4fld5_6	Washout
3	33.924	A4fld5_6	Washout
3.16667	40.701	A4fld5_6	Washout
3.33333	36.148	A4fld5_6	Washout
3.5	36.477	A4fld5_6	Washout
3.66667	44.662	A4fld5_6	Washout
3.83333	55.003	A4fld5_6	Washout
4	49.089	A4fld5_6	Washout
4.16667	47.959	A4fld5_6	Washout
4.33333	50.229	A4fld5_6	Washout
4.5	50.356	A4fld5_6	Washout
4.66667	53.245	A4fld5_6	Washout
4.83333	43.397	A4fld5_6	Washout
0	-0.165	A4fld5_7	Washout
0.166667	3.825	A4fld5_7	Washout
0.333333	3.184	A4fld5_7	Washout
0.5	7.348	A4fld5_7	Washout
0.666667	7.068	A4fld5_7	Washout
0.833333	8.548	A4fld5_7	Washout
1	11.207	A4fld5_7	Washout
1.16667	18.422	A4fld5_7	Washout
1.33333	22.345	A4fld5_7	Washout
1.5	18.875	A4fld5_7	Washout
1.66667	24.448	A4fld5_7	Washout
1.83333	21.221	A4fld5_7	Washout
2	27.932	A4fld5_7	Washout
2.16667	27.521	A4fld5_7	Washout
2.33333	40.318	A4fld5_7	Washout
2.5	35.408	A4fld5_7	Washout
2.66667	44.224	A4fld5_7	Washout
2.83333	48.664	A4fld5_7	Washout
3	45.68	A4fld5_7	Washout
3.16667	46.362	A4fld5_7	Washout
3.33333	46.243	A4fld5_7	Washout
3.5	46.565	A4fld5_7	Washout
3.66667	52.237	A4fld5_7	Washout
3.83333	62.398	A4fld5_7	Washout
4	66.409	A4fld5_7	Washout
4.16667	66.035	A4fld5_7	Washout
4.33333	61.777	A4fld5_7	Washout
4.5	64.242	A4fld5_7	Washout
4.66667	71.093	A4fld5_7	Washout
4.83333	76.447	A4fld5_7	Washout
0	5.392	A4fld5_8	Washout
0.166667	3.784	A4fld5_8	Washout
0.333333	3.64	A4fld5_8	Washout
0.5	6.244	A4fld5_8	Washout
0.666667	3.919	A4fld5_8	Washout
0.833333	3.561	A4fld5_8	Washout
1	4.811	A4fld5_8	Washout
1.16667	-0.088	A4fld5_8	Washout
1.33333	13.933	A4fld5_8	Washout
0	39.256	A4fld5_9	Washout
0.166667	34.309	A4fld5_9	Washout
0.333333	36.83	A4fld5_9	Washout
0.5	34.785	A4fld5_9	Washout
0.666667	31.159	A4fld5_9	Washout
0.833333	33.431	A4fld5_9	Washout
1	32.58	A4fld5_9	Washout
1.16667	35.067	A4fld5_9	Washout
1.33333	39.155	A4fld5_9	Washout
[truncated: 592 more rows]
