# Supplementary material for: Dynamic regulation of chromatin accessibility by pluripotency transcription factors across the cell cycle
Source: eLife. 2019 Dec 3;8:e50087. doi: 10.7554/eLife.50087 (PMC6890464; doi:10.7554/eLife.50087)
Supplement: Supplementary file 1. — This file contains p-values and fold change values for all relevant comparisons in Figure 1D–G, Figure 2B,C,J,K, Figure 2—figure supplement 1A,C,D,F,H, Figure 2—figure supplement 2B–G, Figure 3F, Figure 3—figure supplement 2C, Figure 3—figure supplement 3D, Figure 3—figure supplement 4D–E, Figure 4D–E, and Figure 5—figure supplement 1F-G. [file elife-50087-supp1.xlsx]

## Sheet: Lineplots
Assay	Subset	Group1	Group2	Test	p-value	Fold change	Figure
ATAC-seq	OD	SOX2ON 26h	SOX2OFF 26h	Mann-Whitney U	1.12837e-27	1.06889	1D
ATAC-seq	CD	SOX2ON 26h	SOX2OFF 26h	Mann-Whitney U	0	2.56429	1D
ATAC-seq	SD	SOX2ON 26h	SOX2OFF 26h	Mann-Whitney U	0	2.90837	1D
ATAC-seq	OD	OCT4ON S2iL	OCT4OFF S2iL	Mann-Whitney U	0	2.42142	1E
ATAC-seq	CD	OCT4ON S2iL	OCT4OFF S2iL	Mann-Whitney U	0	2.76667	1E
ATAC-seq	SD	OCT4ON S2iL	OCT4OFF S2iL	Mann-Whitney U	0.0344599	1.01089	1E
H3K27ac ChIP-seq	OD	SOX2ON 26h	SOX2OFF 26h	Mann-Whitney U	8.55365e-06	0.948303	1F
H3K27ac ChIP-seq	CD	SOX2ON 26h	SOX2OFF 26h	Mann-Whitney U	3.6178e-201	1.62931	1F
H3K27ac ChIP-seq	SD	SOX2ON 26h	SOX2OFF 26h	Mann-Whitney U	1.45194e-141	1.70052	1F
H3K27ac ChIP-seq	OD	OCT4ON S2iL	OCT4OFF S2iL	Mann-Whitney U	0	1.87571	1G
H3K27ac ChIP-seq	CD	OCT4ON S2iL	OCT4OFF S2iL	Mann-Whitney U	1.058e-211	2.17162	1G
H3K27ac ChIP-seq	SD	OCT4ON S2iL	OCT4OFF S2iL	Mann-Whitney U	0.00197941	1.03314	1G
BRG1 ChIP-seq	OD	SOX2ON 26h	SOX2OFF 26h	Mann-Whitney U	2.03832e-49	1.14281	2B
BRG1 ChIP-seq	CD	SOX2ON 26h	SOX2OFF 26h	Mann-Whitney U	5.44454e-243	1.67329	2B
BRG1 ChIP-seq	SD	SOX2ON 26h	SOX2OFF 26h	Mann-Whitney U	7.79087e-154	1.64726	2B
BRG1 ChIP-seq	OD	OCT4ON SL	OCT4OFF SL	Mann-Whitney U	0	2.03762	2C
BRG1 ChIP-seq	CD	OCT4ON SL	OCT4OFF SL	Mann-Whitney U	0	2.4068	2C
BRG1 ChIP-seq	SD	OCT4ON SL	OCT4OFF SL	Mann-Whitney U	1.12609e-08	1.84765	2C
OCT4 ChIP-seq	OD	SOX2ON 26h	SOX2OFF 26h	Mann-Whitney U	7.56066e-267	1.42283	2J
OCT4 ChIP-seq	CD	SOX2ON 26h	SOX2OFF 26h	Mann-Whitney U	0	3.16435	2J
OCT4 ChIP-seq	SD	SOX2ON 26h	SOX2OFF 26h	Mann-Whitney U	0	2.95868	2J
SOX2 ChIP-seq	OD	OCT4ON SL	OCT4OFF SL	Mann-Whitney U	0	1.98766	2K
SOX2 ChIP-seq	CD	OCT4ON SL	OCT4OFF SL	Mann-Whitney U	0	2.3504	2K
SOX2 ChIP-seq	SD	OCT4ON SL	OCT4OFF SL	Mann-Whitney U	3.4677e-08	0.712705	2K
ATAC-seq	OD	BRG1ON	BRG1OFF TAM 72h	Mann-Whitney U	0	2.47457	2 supplement 1A
ATAC-seq	CD	BRG1ON	BRG1OFF TAM 72h	Mann-Whitney U	1.90543e-221	2.66181	2 supplement 1A
ATAC-seq	SD	BRG1ON	BRG1OFF TAM 72h	Mann-Whitney U	1.34014e-120	3.24686	2 supplement 1A
ATAC-seq	TSC	SD	OD	Mann-Whitney U	9.29018e-73	2.94823	2 supplement 1C
ATAC-seq	TSC	SD	CD	Mann-Whitney U	1.2328e-52	2.98553	2 supplement 1C
SOX2 ChIP-seq	TSC	SD	OD	Mann-Whitney U	3.18136e-14	1.53397	2 supplement 1D
SOX2 ChIP-seq	TSC	SD	CD	Mann-Whitney U	5.25658e-23	1.76607	2 supplement 1D
KLF4 ChIP-seq		CD	OD	Mann-Whitney U	0.0228326	1.04506	2 supplement 1F
SALL4 ChIP-seq		CD	OD	Mann-Whitney U	2.2547e-137	1.55052	2 supplement 1F
NANOG ChIP-seq		CD	OD	Mann-Whitney U	1.07378e-115	1.72803	2 supplement 1F
ESRRB ChIP-seq		CD	OD	Mann-Whitney U	6.18035e-81	1.42767	2 supplement 1F
SOX2 ChIP-seq	OD	WT	PARP1KO	Mann-Whitney U	1.45602e-99	2.03347	2 supplement 1H
SOX2 ChIP-seq	CD	WT	PARP1KO	Mann-Whitney U	3.30998e-56	2.07122	2 supplement 1H
SOX2 ChIP-seq	SD	WT	PARP1KO	Mann-Whitney U	2.08286e-28	2.23314	2 supplement 1H
ATAC-seq	OD w/ OCT4-SOX2 motif overlap	SOX2ON 26h	SOX2OFF 26h	Mann-Whitney U	4.65712e-42	1.18252	2 supplement 2B
ATAC-seq	CD w/ OCT4-SOX2 motif overlap	SOX2ON 26h	SOX2OFF 26h	Mann-Whitney U	4.24747e-248	2.53809	2 supplement 2B
ATAC-seq	SD w/ OCT4-SOX2 motif overlap	SOX2ON 26h	SOX2OFF 26h	Mann-Whitney U	9.53121e-53	2.86942	2 supplement 2B
ATAC-seq	OD w/ OCT4-SOX2 motif overlap	OCT4ON S2iL	OCT4OFF S2iL	Mann-Whitney U	0	3.98237	2 supplement 2C
ATAC-seq	CD w/ OCT4-SOX2 motif overlap	OCT4ON S2iL	OCT4OFF S2iL	Mann-Whitney U	1.07779e-281	4.65479	2 supplement 2C
ATAC-seq	SD w/ OCT4-SOX2 motif overlap	OCT4ON S2iL	OCT4OFF S2iL	Mann-Whitney U	5.56921e-13	1.58161	2 supplement 2C
OCT4 ChIP-seq	OD w/ OCT4-SOX2 motif overlap	SOX2ON 26h	SOX2OFF 26h	Mann-Whitney U	2.36451e-167	1.5525	2 supplement 2D
OCT4 ChIP-seq	CD w/ OCT4-SOX2 motif overlap	SOX2ON 26h	SOX2OFF 26h	Mann-Whitney U	3.12106e-260	3.07645	2 supplement 2D
OCT4 ChIP-seq	SD w/ OCT4-SOX2 motif overlap	SOX2ON 26h	SOX2OFF 26h	Mann-Whitney U	1.50184e-53	3.00249	2 supplement 2D
SOX2 ChIP-seq	OD w/ OCT4-SOX2 motif overlap	OCT4ON SL	OCT4OFF SL	Mann-Whitney U	0	3.21752	2 supplement 2E
SOX2 ChIP-seq	CD w/ OCT4-SOX2 motif overlap	OCT4ON S2iL	OCT4OFF S2iL	Mann-Whitney U	1.67908e-251	3.74136	2 supplement 2E
SOX2 ChIP-seq	SD w/ OCT4-SOX2 motif overlap	OCT4ON S2iL	OCT4OFF S2iL	Mann-Whitney U	0.00192966	1.15898	2 supplement 2E
ATAC-seq	SOX2+ATAC gained	SOX2ON 26h	SOX2OFF 26h	Mann-Whitney U	3.46043e-54	1.36119	2 supplement 2F
BRG1 ChIP-seq	SOX2+ATAC gained	OCT4ON SL	OCT4OFF SL	Mann-Whitney U	2.61858e-98	0.733205	2 supplement 2G
OCT4 ChIP-seq		Cluster 1	Cluster 2	Mann-Whitney U	4.82188e-84	1.82384	3F
OCT4 ChIP-seq		Cluster 1	Cluster 3	Mann-Whitney U	1.44176e-66	1.63666	3F
OCT4 ChIP-seq		Cluster 1	Cluster 4	Mann-Whitney U	4.18697e-273	2.70043	3F
ATAC-seq	Cluster 1	OCT4 high	OCT4 low	Mann-Whitney U	0.000508071	1.134	3 supplement 3D
ATAC-seq	Cluster 2	OCT4 high	OCT4 low	Mann-Whitney U	0.0403855	1.08897	3 supplement 3D
ATAC-seq	Cluster 3	OCT4 high	OCT4 low	Mann-Whitney U	0.00148697	1.09537	3 supplement 3D
ATAC-seq	Cluster 4	OCT4 high	OCT4 low	Mann-Whitney U	0.02456	1.07258	3 supplement 3D
KLF4 ChIP-seq		Cluster 1	Cluster 4	Mann-Whitney U	0.843457	1.05893	3 supplement 4D
KLF4 ChIP-seq		Cluster 3	Cluster 4	Mann-Whitney U	0.0128216	1.1282	3 supplement 4D
KLF5 ChIP-seq		Cluster 1	Cluster 4	Mann-Whitney U	5.56227e-16	1.37555	3 supplement 4D
KLF5 ChIP-seq		Cluster 3	Cluster 4	Mann-Whitney U	5.33139e-22	1.34089	3 supplement 4D
CHD4		Cluster 1	Cluster 2	Mann-Whitney U	1.79901e-33	1.22232	3 supplement 4D
CHD4		Cluster 3	Cluster 2	Mann-Whitney U	2.71879e-35	1.17897	3 supplement 4D
SALL4 ChIP-seq		Cluster 1	Cluster 3	Mann-Whitney U	2.17377e-26	1.31233	3 supplement 4D
NANOG ChIP-seq		Cluster 1	Cluster 3	Mann-Whitney U	1.72085e-17	1.30257	3 supplement 4D
ESRRB ChIP-seq		Cluster 1	Cluster 3	Mann-Whitney U	1.57971e-11	1.2068	3 supplement 4D
MBD3 ChIP-seq		Cluster 1	Cluster 4	Mann-Whitney U	1.12834e-64	1.27451	3 supplement 4D
MBD3 ChIP-seq		Cluster 3	Cluster 4	Mann-Whitney U	1.03005e-78	1.23548	3 supplement 4D
SOX2 ChIP-seq		Cluster 1	Cluster 3	Mann-Whitney U	3.50259e-11	1.21813	3 supplement 4D
DAX1		Cluster 1	Cluster 2	Mann-Whitney U	3.82918e-70	1.91044	3 supplement 4D
DAX1		Cluster 3	Cluster 2	Mann-Whitney U	8.76541e-66	1.80186	3 supplement 4D
TBX3		Cluster 1	Cluster 3	Mann-Whitney U	3.79864e-06	1.21827	3 supplement 4D
CTCF		Cluster 1	Cluster 3	Mann-Whitney U	3.21487e-12	0.616052	3 supplement 4E
RAD21		Cluster 1	Cluster 3	Mann-Whitney U	1.47086e-07	0.791852	3 supplement 4E

## Sheet: MD-OCT4 H3K27ac
Distribution	Cluster	Group1	Group2	Test	p-value	Fold change	Figure
MD/MD*	1	EG1	LG1	Mann-Whitney	0.0231429	1.14935	3 supplement 2C
MD/MD*	1	LG1	S	Mann-Whitney	2.68768e-20	2.19719	3 supplement 2C
MD/MD*	1	S	SG2	Mann-Whitney	0.912591	0.918353	3 supplement 2C
MD/MD*	2	EG1	LG1	Mann-Whitney	1.87659e-05	2.30115	3 supplement 2C
MD/MD*	2	LG1	S	Mann-Whitney	0.00139911	6.82229	3 supplement 2C
MD/MD*	2	S	SG2	Mann-Whitney	0.35793	0.226821	3 supplement 2C
MD/MD*	3	EG1	LG1	Mann-Whitney	0.000154129	0.8981	3 supplement 2C
MD/MD*	3	LG1	S	Mann-Whitney	0.0237345	1.25067	3 supplement 2C
MD/MD*	3	S	SG2	Mann-Whitney	7.89265e-05	1.22751	3 supplement 2C
MD/MD*	4	EG1	LG1	Mann-Whitney	0.00771602	0.886457	3 supplement 2C
MD/MD*	4	LG1	S	Mann-Whitney	1.18085e-84	-2.01669	3 supplement 2C
MD/MD*	4	S	SG2	Mann-Whitney	3.35203e-11	2.60471	3 supplement 2C

## Sheet: OCT4-AID
Distribution	Cluster	Subset	Group1	Group2	Test	p-value	Fold change	Figure
IAA 2h/control	1		EG1	LG1	Mann-Whitney	0.440548	0.963724	4D
IAA 2h/control	1		LG1	S	Mann-Whitney	0.0031361	0.832673	4D
IAA 2h/control	1		S	SG2	Mann-Whitney	0.141259	1.07674	4D
IAA 2h/control	2		EG1	LG1	Mann-Whitney	0.258504	0.861595	4D
IAA 2h/control	2		LG1	S	Mann-Whitney	0.0304837	0.819887	4D
IAA 2h/control	2		S	SG2	Mann-Whitney	0.216516	1.07866	4D
IAA 2h/control	3		EG1	LG1	Mann-Whitney	0.30907	0.840425	4D
IAA 2h/control	3		LG1	S	Mann-Whitney	0.0319647	0.790324	4D
IAA 2h/control	3		S	SG2	Mann-Whitney	0.148929	1.1281	4D
IAA 2h/control	4		EG1	LG1	Mann-Whitney	7.80111e-07	-0.432773	4D
IAA 2h/control	4		LG1	S	Mann-Whitney	0.0131549	2.7928	4D
IAA 2h/control	4		S	SG2	Mann-Whitney	0.619131	0.455145	4D
Treatment/control	1	EG1	IAA 2h	IAA washout	Mann-Whitney	4.05697e-05	1.33311	4D-E
Treatment/control	1	LG1	IAA 2h	IAA washout	Mann-Whitney	6.70297e-17	1.80013	4D-E
Treatment/control	1	S	IAA 2h	IAA washout	Mann-Whitney	2.32252e-22	1.91712	4D-E
Treatment/control	1	SG2	IAA 2h	IAA washout	Mann-Whitney	4.08831e-09	1.5026	4D-E
Treatment/control	2	EG1	IAA 2h	IAA washout	Mann-Whitney	0.534505	1.02928	4D-E
Treatment/control	2	LG1	IAA 2h	IAA washout	Mann-Whitney	0.000199397	1.75522	4D-E
Treatment/control	2	S	IAA 2h	IAA washout	Mann-Whitney	2.35061e-05	1.70184	4D-E
Treatment/control	2	SG2	IAA 2h	IAA washout	Mann-Whitney	0.0163193	1.49752	4D-E
Treatment/control	3	EG1	IAA 2h	IAA washout	Mann-Whitney	7.52477e-38	0.368399	4D-E
Treatment/control	3	LG1	IAA 2h	IAA washout	Mann-Whitney	7.27902e-13	0.541835	4D-E
Treatment/control	3	S	IAA 2h	IAA washout	Mann-Whitney	3.59281e-14	0.629017	4D-E
Treatment/control	3	SG2	IAA 2h	IAA washout	Mann-Whitney	5.60569e-18	0.526759	4D-E
Treatment/control	4	EG1	IAA 2h	IAA washout	Mann-Whitney	1.40887e-14	-0.150856	4D-E
Treatment/control	4	LG1	IAA 2h	IAA washout	Mann-Whitney	8.9356e-08	-1.05937	4D-E
Treatment/control	4	S	IAA 2h	IAA washout	Mann-Whitney	9.47518e-05	0.179766	4D-E
Treatment/control	4	SG2	IAA 2h	IAA washout	Mann-Whitney	0.0033295	-1.18551	4D-E

## Sheet: RT-qPCR
Gene	Cluster	p-value pre-mRNA	Test pre-mRNA	Fold change pre-mRNA	p-value mRNA	Test mRNA	Fold change mRNA	Figure
Klf5	1	0.0570828	t-test	0.719197	0.60529	t-test	0.954492	5 supplement 1F-G
Lefty2	1	0.143076	t-test	0.822319	0.265011	t-test	1.24044	5 supplement 1F-G
Myc	1	0.0341034	t-test	0.683009	0.0831906	t-test	0.853694	5 supplement 1F-G
Rbbp5	1	0.266834	t-test	0.905822	0.625	Mann-Whitney	1.13036	5 supplement 1F-G
Fam25c	1	0.125	Mann-Whitney	0.826761	0.863616	t-test	1.00791	5 supplement 1F-G
Esrrb	2	0.4375	Mann-Whitney	0.891159	0.522666	t-test	1.14658	5 supplement 1F-G
Steap2	2	0.180171	t-test	0.850115	0.657727	t-test	0.994874	5 supplement 1F-G
Trps1	2	0.647745	t-test	0.947871	0.519701	t-test	1.2132	5 supplement 1F-G
Jam2	2	0.0625	Mann-Whitney	0.56328	0.4375	Mann-Whitney	1.139	5 supplement 1F-G
Terf1	2	0.4375	Mann-Whitney	0.925323	0.813279	t-test	1.08244	5 supplement 1F-G
Myh13	3	0.116408	t-test	0.803172	0.882544	t-test	1.04906	5 supplement 1F-G
Tfcp2l1	3	0.3125	Mann-Whitney	0.74686	0.4375	Mann-Whitney	1.74039	5 supplement 1F-G
Fbxo22	3	0.747043	t-test	1.14294	0.472354	t-test	1.12497	5 supplement 1F-G
Msc	3	0.89133	t-test	1.02223	0.4375	Mann-Whitney	1.07575	5 supplement 1F-G
Ruvbl1	3	0.934652	t-test	1.17267	0.0968703	t-test	1.51855	5 supplement 1F-G
Insr	4	0.302071	t-test	1.18035	0.132989	t-test	1.89507	5 supplement 1F-G
Nes	4	0.492411	t-test	0.956561	0.273636	t-test	1.29417	5 supplement 1F-G
Cntln	4	0.398732	t-test	1.17647	0.0433583	t-test	1.28574	5 supplement 1F-G
Agrn	4	0.437262	t-test	1.21873	0.956152	t-test	1.00924	5 supplement 1F-G
Mllt10	4	0.794568	t-test	1.05063	0.150826	t-test	1.16525	5 supplement 1F-G
Smyd3	4	0.207206	t-test	1.09518	0.121317	t-test	1.13938	5 supplement 1F-G
Ticrr	4	0.885362	t-test	0.991498	0.202035	t-test	1.23166	5 supplement 1F-G
