# Supplementary material for: Dynamic regulation of chromatin accessibility by pluripotency transcription factors across the cell cycle
Source: eLife. 2019 Dec 3;8:e50087. doi: 10.7554/eLife.50087 (PMC6890464; doi:10.7554/eLife.50087)
Supplement: Supplementary file 2. — This file contains enrichment values (logP) and frequencies of known motifs from HOMER in the following groups of loci: OD, CD, SD, OCT4 OFF upregulated (OCT4up), SOX2 OFF upregulated (SOX2up), and clusters 1–4. Only motifs with -logP < 50 in at least one group are shown. [file elife-50087-supp2.xlsx]

## Sheet: OD_CD_SD
Motif.Name	logP_OD	Frequency_OD	logP_CD	Frequency_CD	logP_SD	Frequency_SD
OCT4-SOX2-TCF-NANOG(POU,Homeobox,HMG)/mES-Oct4-ChIP-Seq(GSE11431)/Homer	-3639	0.3783	-1177	0.4124	-50.79	0.1369
Sox2(HMG)/mES-Sox2-ChIP-Seq(GSE11431)/Homer	-716.6	0.4727	-617.6	0.6556	-823.8	0.7644
Sox3(HMG)/NPC-Sox3-ChIP-Seq(GSE33059)/Homer	-578.4	0.6844	-535.3	0.8581	-685	0.928
Sox17(HMG)/Endoderm-Sox17-ChIP-Seq(GSE61475)/Homer	-517.1	0.3772	-485.9	0.5439	-601.2	0.6276
Sox6(HMG)/Myotubes-Sox6-ChIP-Seq(GSE32627)/Homer	-448.2	0.6257	-411.2	0.7972	-490.7	0.8484
Sox15(HMG)/CPA-Sox15-ChIP-Seq(GSE62909)/Homer	-364.4	0.4766	-406.7	0.6583	-611.5	0.7639
Sox10(HMG)/SciaticNerve-Sox3-ChIP-Seq(GSE35132)/Homer	-262.6	0.5997	-353.5	0.781	-545.2	0.8708
Sox4(HMG)/proB-Sox4-ChIP-Seq(GSE50066)/Homer	-186.2	0.3615	-244.7	0.5109	-536	0.6587
KLF5(Zf)/LoVo-KLF5-ChIP-Seq(GSE49402)/Homer	-619.5	0.5127	-192.1	0.5049	-45.67	0.4313
Oct4(POU,Homeobox)/mES-Oct4-ChIP-Seq(GSE11431)/Homer	-1383	0.3843	-186.9	0.3471	-1.165	0.1707
KLF3(Zf)/MEF-Klf3-ChIP-Seq(GSE44748)/Homer	-683.1	0.259	-171.1	0.2304	-53.76	0.1952
Brn1(POU,Homeobox)/NPC-Brn1-ChIP-Seq(GSE35496)/Homer	-1369	0.3122	-169.4	0.26	-1.688	0.1221
Klf4(Zf)/mES-Klf4-ChIP-Seq(GSE11431)/Homer	-528.4	0.2213	-152.5	0.2065	-43.95	0.1723
KLF6(Zf)/PDAC-KLF6-ChIP-Seq(GSE64557)/Homer	-504.4	0.4091	-146.1	0.3892	-38.31	0.3391
Oct11(POU,Homeobox)/NCIH1048-POU2F3-ChIP-seq(GSE115123)/Homer	-903.9	0.259	-142.3	0.2395	-3.978	0.1205
Sox9(HMG)/Limb-SOX9-ChIP-Seq(GSE73225)/Homer	-100.8	0.3573	-138.6	0.4813	-233.4	0.5578
EKLF(Zf)/Erythrocyte-Klf1-ChIP-Seq(GSE20478)/Homer	-421.6	0.1474	-137.6	0.1463	-47.58	0.1227
Sp2(Zf)/HEK293-Sp2.eGFP-ChIP-Seq(Encode)/Homer	-455.7	0.5078	-136.4	0.4844	-48.95	0.4482
Oct6(POU,Homeobox)/NPC-Pou3f1-ChIP-Seq(GSE35496)/Homer	-1160	0.3537	-126.9	0.3037	-1.742	0.1658
LEF1(HMG)/H1-LEF1-ChIP-Seq(GSE64758)/Homer	-194	0.318	-91.63	0.3888	-47.43	0.3539
TSO1(CPP)/col-TSO1-DAP-Seq(GSE60143)/Homer	-20.17	0.0574	-89.99	0.1261	-1.216	0.0545
Oct2(POU,Homeobox)/Bcell-Oct2-ChIP-Seq(GSE21512)/Homer	-644.8	0.2207	-84.69	0.1985	-1.218	0.1009
TCFL2(HMG)/K562-TCF7L2-ChIP-Seq(GSE29196)/Homer	-61.23	0.0492	-80.41	0.0834	-10.55	0.0507
NFkB-p65(RHD)/GM12787-p65-ChIP-Seq(GSE19485)/Homer	-105.5	0.2055	-78.53	0.2553	-6.313	0.1838
TEAD4(TEA)/Tropoblast-Tead4-ChIP-Seq(GSE37350)/Homer	-342.9	0.3817	-74.79	0.3959	-94.92	0.41
Zic3(Zf)/mES-Zic3-ChIP-Seq(GSE37889)/Homer	-547	0.2844	-74.67	0.2227	-43.06	0.2263
TEAD(TEA)/Fibroblast-PU.1-ChIP-Seq(Unpublished)/Homer	-209.6	0.3013	-71.77	0.3481	-91.87	0.3566
Dlx3(Homeobox)/Kerainocytes-Dlx3-ChIP-Seq(GSE89884)/Homer	-59.4	0.2512	-69.07	0.3465	-1.158	0.2186
TEAD1(TEAD)/HepG2-TEAD1-ChIP-Seq(Encode)/Homer	-333.9	0.4197	-65.12	0.439	-98.07	0.4542
Unknown-ESC-element(?)/mES-Nanog-ChIP-Seq(GSE11724)/Homer	-441.1	0.2978	-62.63	0.2486	-20.29	0.2268
NFkB-p50,p52(RHD)/Monocyte-p50-ChIP-Chip(Schreiber_et_al.)/Homer	-36.8	0.0421	-61.25	0.0639	-2.863	0.0333
TEAD2(TEA)/Py2T-Tead2-ChIP-Seq(GSE55709)/Homer	-296.7	0.2691	-60.5	0.2775	-103.5	0.3081
Sp5(Zf)/mES-Sp5.Flag-ChIP-Seq(GSE72989)/Homer	-208.3	0.3323	-53.57	0.3061	-24.43	0.2939
Zic(Zf)/Cerebellum-ZIC1.2-ChIP-Seq(GSE60731)/Homer	-375.9	0.3698	-51.44	0.3266	-11.52	0.2884
Klf9(Zf)/GBM-Klf9-ChIP-Seq(GSE62211)/Homer	-203.3	0.1831	-51.28	0.1675	-22.94	0.1543
ZNF652/HepG2-ZNF652.Flag-ChIP-Seq(Encode)/Homer	-14	0.0887	-50.29	0.1487	-8.459	0.1058
Tcf4(HMG)/Hct116-Tcf4-ChIP-Seq(SRA012054)/Homer	-108.3	0.2132	-47.87	0.257	-35.43	0.2475
SGR5(C2H2)/colamp-SGR5-DAP-Seq(GSE60143)/Homer	-6.875	0.2422	-46.53	0.3592	-90.96	0.3948
Lhx2(Homeobox)/HFSC-Lhx2-ChIP-Seq(GSE48068)/Homer	-52.9	0.384	-42.93	0.484	-0.01837	0.3304
Lhx1(Homeobox)/EmbryoCarcinoma-Lhx1-ChIP-Seq(GSE70957)/Homer	-76.96	0.4137	-41.91	0.5055	-0.1083	0.3593
ERRg(NR)/Kidney-ESRRG-ChIP-Seq(GSE104905)/Homer	-348.1	0.3749	-40.86	0.3451	-78.34	0.3942
NFkB-p65-Rel(RHD)/ThioMac-LPS-Expression(GSE23622)/Homer	-72.98	0.0315	-40.48	0.0434	-5.788	0.0256
ATHB24(ZFHD)/colamp-ATHB24-DAP-Seq(GSE60143)/Homer	-87.24	0.2863	-39.03	0.3491	-0.038	0.2214
Nrf2(bZIP)/Lymphoblast-Nrf2-ChIP-Seq(GSE37589)/Homer	-165.5	0.0389	-36.04	0.0346	-19.76	0.0311
TEAD3(TEA)/HepG2-TEAD3-ChIP-Seq(Encode)/Homer	-237.6	0.4512	-35.41	0.4682	-60.88	0.4738
Tcf3(HMG)/mES-Tcf3-ChIP-Seq(GSE11724)/Homer	-76.27	0.128	-35.04	0.1598	-8.193	0.1265
GLIS3(Zf)/Thyroid-Glis3.GFP-ChIP-Seq(GSE103297)/Homer	-51.92	0.4136	-34.27	0.4272	-9.097	0.3959
STAT4(Stat)/CD4-Stat4-ChIP-Seq(GSE22104)/Homer	-59.17	0.3424	-32.78	0.4073	-24.63	0.3871
ATHB34(ZFHD)/colamp-ATHB34-DAP-Seq(GSE60143)/Homer	-79.51	0.3008	-32.18	0.3623	-0.005245	0.2301
Esrrb(NR)/mES-Esrrb-ChIP-Seq(GSE11431)/Homer	-348.7	0.3287	-30.81	0.2947	-61.55	0.3332
KLF14(Zf)/HEK293-KLF14.GFP-ChIP-Seq(GSE58341)/Homer	-114.5	0.5155	-30.55	0.4982	-2.653	0.4466
Nr5a2(NR)/Pancreas-LRH1-ChIP-Seq(GSE34295)/Homer	-250.8	0.3484	-30.32	0.3317	-16.85	0.3228
Bach1(bZIP)/K562-Bach1-ChIP-Seq(GSE31477)/Homer	-150.9	0.0413	-28.45	0.0373	-14.05	0.0311
ATHB23(ZFHD)/col-ATHB23-DAP-Seq(GSE60143)/Homer	-66.56	0.3261	-28.31	0.3942	-0.01918	0.265
LXH9(Homeobox)/Hct116-LXH9.V5-ChIP-Seq(GSE116822)/Homer	-55.34	0.481	-27.51	0.5654	-0.3938	0.4427
Nr5a2(NR)/mES-Nr5a2-ChIP-Seq(GSE19019)/Homer	-202.6	0.2746	-25.68	0.2624	-49	0.2988
DEL1(E2FDP)/colamp-DEL1-DAP-Seq(GSE60143)/Homer	-57.4	0.0059	-25.14	0.0081	-8.351	0.0044
E2F4(E2F)/K562-E2F4-ChIP-Seq(GSE31477)/Homer	-78.78	0.0887	-23.24	0.0767	-8.996	0.0731
NF-E2(bZIP)/K562-NFE2-ChIP-Seq(GSE31477)/Homer	-147.7	0.0427	-22.94	0.0346	-12.83	0.0305
OCT:OCT(POU,Homeobox,IR1)/NPC-Brn2-ChIP-Seq(GSE35496)/Homer	-81.49	0.0156	-22.32	0.0168	-1.621	0.0065
SF1(NR)/H295R-Nr5a1-ChIP-Seq(GSE44220)/Homer	-224.7	0.2608	-21.84	0.2418	-47.76	0.283
Nur77(NR)/K562-NR4A1-ChIP-Seq(GSE31363)/Homer	-74.09	0.0858	-21.76	0.0949	-8.146	0.0802
Sp1(Zf)/Promoter/Homer	-93.56	0.0593	-20.67	0.042	-14.39	0.048
Elk1(ETS)/Hela-Elk1-ChIP-Seq(GSE31477)/Homer	-76.89	0.1797	-20.24	0.1705	-10.42	0.1663
Bach2(bZIP)/OCILy7-Bach2-ChIP-Seq(GSE44420)/Homer	-138.6	0.0944	-19.28	0.0854	-13.87	0.0802
E2F7(E2F)/Hela-E2F7-ChIP-Seq(GSE32673)/Homer	-64.44	0.029	-17.85	0.0242	-4.23	0.0174
Oct4:Sox17(POU,Homeobox,HMG)/F9-Sox17-ChIP-Seq(GSE44553)/Homer	-12.42	0.0514	-16.75	0.076	-55.56	0.1025
Atf3(bZIP)/GBM-ATF3-ChIP-Seq(GSE33912)/Homer	-116.3	0.2429	-16.56	0.2482	-9.539	0.2225
MYNN(Zf)/HEK293-MYNN.eGFP-ChIP-Seq(Encode)/Homer	-73.87	0.1179	-16.01	0.1342	-6.744	0.1112
E2F1(E2F)/Hela-E2F1-ChIP-Seq(GSE22478)/Homer	-53.98	0.0446	-15.86	0.038	-6.984	0.0354
AP-2alpha(AP2)/Hela-AP2alpha-ChIP-Seq(GSE31477)/Homer	-0.1354	0.1845	-15.83	0.217	-225	0.3975
AP-2gamma(AP2)/MCF7-TFAP2C-ChIP-Seq(GSE21234)/Homer	-0.1996	0.2451	-15.09	0.2795	-184.4	0.452
Zfp281(Zf)/ES-Zfp281-ChIP-Seq(GSE81042)/Homer	-122.8	0.1257	-15.02	0.0989	-11.3	0.102
Fra1(bZIP)/BT549-Fra1-ChIP-Seq(GSE46166)/Homer	-107.5	0.2046	-14.77	0.2085	-9.794	0.1897
Fra2(bZIP)/Striatum-Fra2-ChIP-Seq(GSE43429)/Homer	-142.2	0.1874	-14.28	0.1773	-16.61	0.1761
Elk4(ETS)/Hela-Elk4-ChIP-Seq(GSE31477)/Homer	-66.66	0.1725	-13.83	0.1608	-10.06	0.1625
ELF1(ETS)/Jurkat-ELF1-ChIP-Seq(SRA014231)/Homer	-74.97	0.1703	-13.75	0.1564	-7.461	0.1554
RAR:RXR(NR),DR5/ES-RAR-ChIP-Seq(GSE56893)/Homer	-203.3	0.1243	-13.46	0.1023	-3.094	0.012
E2FA(E2FDP)/colamp-E2FA-DAP-Seq(GSE60143)/Homer	-50.95	0.0922	-11.94	0.0801	-4.441	0.0763
Etv2(ETS)/ES-ER71-ChIP-Seq(GSE59402)/Homer	-107.3	0.3537	-11.87	0.3475	-2.203	0.313
GABPA(ETS)/Jurkat-GABPa-ChIP-Seq(GSE17954)/Homer	-82.5	0.3159	-11.6	0.3098	-26.54	0.3441
Brn2(POU,Homeobox)/NPC-Brn2-ChIP-Seq(GSE35496)/Homer	-75.01	0.0476	-11.59	0.0484	-0.04114	0.0207
ETS1(ETS)/Jurkat-ETS1-ChIP-Seq(GSE17954)/Homer	-97.56	0.3749	-11.53	0.3724	-10.94	0.3653
NFE2L2(bZIP)/HepG2-NFE2L2-ChIP-Seq(Encode)/Homer	-88.07	0.0416	-11.53	0.036	-9.991	0.0338
JunB(bZIP)/DendriticCells-Junb-ChIP-Seq(GSE36099)/Homer	-112.4	0.2039	-11.51	0.2008	-14.92	0.1974
At5g18450(AP2EREBP)/col-At5g18450-DAP-Seq(GSE60143)/Homer	-52.76	0.2512	-11.37	0.2331	-6.612	0.2339
EWS:ERG-fusion(ETS)/CADO_ES1-EWS:ERG-ChIP-Seq(SRA014231)/Homer	-54.42	0.272	-11.34	0.3037	-2.222	0.2595
Fosl2(bZIP)/3T3L1-Fosl2-ChIP-Seq(GSE56872)/Homer	-109.1	0.1315	-11.17	0.1224	-21.32	0.1325
AP-1(bZIP)/ThioMac-PU.1-ChIP-Seq(GSE21512)/Homer	-97.16	0.2634	-10.93	0.2657	-7.75	0.2432
Jun-AP1(bZIP)/K562-cJun-ChIP-Seq(GSE31477)/Homer	-90.19	0.0966	-10.56	0.0888	-20.34	0.0987
Fli1(ETS)/CD8-FLI-ChIP-Seq(GSE20898)/Homer	-88.03	0.3658	-10.05	0.3565	-5.473	0.343
Maz(Zf)/HepG2-Maz-ChIP-Seq(GSE31477)/Homer	-60.6	0.381	-9.823	0.3525	-0.5083	0.3201
SPDEF(ETS)/VCaP-SPDEF-ChIP-Seq(SRA014231)/Homer	-76.67	0.3733	-8.341	0.3676	-19.84	0.3915
ETS(ETS)/Promoter/Homer	-63.02	0.1158	-8.33	0.1033	-4.533	0.102
EWS:FLI1-fusion(ETS)/SK_N_MC-EWS:FLI1-ChIP-Seq(SRA014231)/Homer	-59.39	0.2148	-7.754	0.2129	-5.556	0.2034
Tcfcp2l1(CP2)/mES-Tcfcp2l1-ChIP-Seq(GSE11431)/Homer	-81.16	0.0755	-7.706	0.0639	-8.006	0.0654
COUP-TFII(NR)/K562-NR2F1-ChIP-Seq(Encode)/Homer	-77.07	0.4753	-7.547	0.4696	-24.99	0.5033
Rfx2(HTH)/LoVo-RFX2-ChIP-Seq(GSE49402)/Homer	-52.99	0.0403	-7.121	0.035	-16.2	0.0453
Stat3(Stat)/mES-Stat3-ChIP-Seq(GSE11431)/Homer	-64.92	0.1902	-6.728	0.187	-5.325	0.1788
BATF(bZIP)/Th17-BATF-ChIP-Seq(GSE39756)/Homer	-83.58	0.2355	-5.707	0.2355	-7.072	0.2252
ETV4(ETS)/HepG2-ETV4-ChIP-Seq(ENCODE)/Homer	-111.1	0.3782	-5.604	0.3424	-3.858	0.3391
EAR2(NR)/K562-NR2F6-ChIP-Seq(Encode)/Homer	-95.11	0.4484	-5.601	0.4342	-28.56	0.4776
ELF3(ETS)/PDAC-ELF3-ChIP-Seq(GSE64557)/Homer	-82.73	0.2939	-5.526	0.2873	-18.77	0.3092
ETV1(ETS)/GIST48-ETV1-ChIP-Seq(GSE22441)/Homer	-61.62	0.4561	-5.197	0.4464	-9.823	0.4591
Elf4(ETS)/BMDM-Elf4-ChIP-Seq(GSE88699)/Homer	-76.73	0.3706	-4.58	0.3555	-13.68	0.3822
RARg(NR)/ES-RARg-ChIP-Seq(GSE30538)/Homer	-130.7	0.0698	-3.871	0.0518	-1.309	0.0458
EHF(ETS)/LoVo-EHF-ChIP-Seq(GSE49402)/Homer	-55.11	0.4471	-3.461	0.4501	-5.487	0.4487
ERG(ETS)/VCaP-ERG-ChIP-Seq(GSE14097)/Homer	-53.82	0.5076	-2.967	0.5079	-1.206	0.482
MafK(bZIP)/C2C12-MafK-ChIP-Seq(GSE36030)/Homer	-64.66	0.109	-2.738	0.0871	-0.9314	0.0807
ETS:RUNX(ETS,Runt)/Jurkat-RUNX1-ChIP-Seq(GSE17954)/Homer	-51.93	0.0414	-1.503	0.0272	-0.7161	0.0234
COUP-TFII(NR)/Artia-Nr2f2-ChIP-Seq(GSE46497)/Homer	-53.67	0.5232	-1.106	0.5079	-16.5	0.5491
Unknown4/Drosophila-Promoters/Homer	-53.06	0.054	-0.548	0.0461	-0.6661	0.036

## Sheet: OCT4up_SOX2up
Motif.Name	logP_OCT4up	Frequency_OCT4up	logP_SOX2up	Frequency_SOX2up
AP-2alpha(AP2)/Hela-AP2alpha-ChIP-Seq(GSE31477)/Homer	-2136	0.4976	-10.31	0.3222
AP-2gamma(AP2)/MCF7-TFAP2C-ChIP-Seq(GSE21234)/Homer	-1990	0.5719	-7.689	0.3907
Sp1(Zf)/Promoter/Homer	-983.9	0.2201	-34.69	0.1398
KLF3(Zf)/MEF-Klf3-ChIP-Seq(GSE44748)/Homer	-798.6	0.3038	-65.39	0.3083
Sox2(HMG)/mES-Sox2-ChIP-Seq(GSE11431)/Homer	-712.4	0.3582	-1e-06	0.2167
TEAD4(TEA)/Tropoblast-Tead4-ChIP-Seq(GSE37350)/Homer	-674.7	0.3341	-89.17	0.4463
DMRT1(DM)/Testis-DMRT1-ChIP-Seq(GSE64892)/Homer	-668.9	0.1258	-0.6774	0.0685
DMRT6(DM)/Testis-DMRT6-ChIP-Seq(GSE60440)/Homer	-569.2	0.1168	-0.3045	0.0593
TEAD2(TEA)/Py2T-Tead2-ChIP-Seq(GSE55709)/Homer	-527.2	0.2246	-79.32	0.3176
Sox17(HMG)/Endoderm-Sox17-ChIP-Seq(GSE61475)/Homer	-508.6	0.2776	0	0.1574
Sox3(HMG)/NPC-Sox3-ChIP-Seq(GSE33059)/Homer	-507.7	0.5508	0	0.3861
Klf4(Zf)/mES-Klf4-ChIP-Seq(GSE11431)/Homer	-507.6	0.22	-58.93	0.2574
TEAD1(TEAD)/HepG2-TEAD1-ChIP-Seq(Encode)/Homer	-505.7	0.3575	-88.02	0.4852
Sox15(HMG)/CPA-Sox15-ChIP-Seq(GSE62909)/Homer	-464.3	0.3819	0	0.2593
TEAD(TEA)/Fibroblast-PU.1-ChIP-Seq(Unpublished)/Homer	-443.7	0.2579	-85.59	0.3741
Sox4(HMG)/proB-Sox4-ChIP-Seq(GSE50066)/Homer	-437.7	0.3304	-3.5e-05	0.2185
Sox6(HMG)/Myotubes-Sox6-ChIP-Seq(GSE32627)/Homer	-418.4	0.4856	-5e-06	0.3815
Klf9(Zf)/GBM-Klf9-ChIP-Seq(GSE62211)/Homer	-375.6	0.243	-49.13	0.2648
TEAD3(TEA)/HepG2-TEAD3-ChIP-Seq(Encode)/Homer	-348.2	0.3811	-77.77	0.5213
Sp5(Zf)/mES-Sp5.Flag-ChIP-Seq(GSE72989)/Homer	-343.7	0.4398	-47.06	0.462
ERRg(NR)/Kidney-ESRRG-ChIP-Seq(GSE104905)/Homer	-328.5	0.3259	-20.17	0.363
Esrrb(NR)/mES-Esrrb-ChIP-Seq(GSE11431)/Homer	-324.8	0.27	-25.54	0.3167
Sox10(HMG)/SciaticNerve-Sox3-ChIP-Seq(GSE35132)/Homer	-319	0.5128	0	0.362
E2F4(E2F)/K562-E2F4-ChIP-Seq(GSE31477)/Homer	-318.2	0.2023	-7.932	0.1315
EKLF(Zf)/Erythrocyte-Klf1-ChIP-Seq(GSE20478)/Homer	-283.6	0.112	-51.74	0.1676
KLF5(Zf)/LoVo-KLF5-ChIP-Seq(GSE49402)/Homer	-282.5	0.5095	-54.72	0.5704
ERF9(AP2EREBP)/colamp-ERF9-DAP-Seq(GSE60143)/Homer	-262.9	0.1461	-5.671	0.0657
LOB(LOBAS2)/col-LOB-DAP-Seq(GSE60143)/Homer	-257.6	0.1108	-2.565	0.0463
ERF5(AP2EREBP)/colamp-ERF5-DAP-Seq(GSE60143)/Homer	-255.6	0.1988	-5.073	0.0981
LEP(AP2EREBP)/col-LEP-DAP-Seq(GSE60143)/Homer	-251.7	0.1577	-7.276	0.0694
ANAC094(NAC)/col-ANAC094-DAP-Seq(GSE60143)/Homer	-243.5	0.1194	-4.171	0.0611
Nr5a2(NR)/mES-Nr5a2-ChIP-Seq(GSE19019)/Homer	-241.6	0.247	-6.356	0.2528
Ronin(THAP)/ES-Thap11-ChIP-Seq(GSE51522)/Homer	-238.2	0.0229	-22.41	0.0231
At5g65130(AP2EREBP)/colamp-At5g65130-DAP-Seq(GSE60143)/Homer	-235	0.0983	-3.3	0.0481
Jun-AP1(bZIP)/K562-cJun-ChIP-Seq(GSE31477)/Homer	-231.5	0.0889	-23.83	0.1185
SF1(NR)/H295R-Nr5a1-ChIP-Seq(GSE44220)/Homer	-225.4	0.2188	-8.345	0.2324
AT4G18450(AP2EREBP)/col-AT4G18450-DAP-Seq(GSE60143)/Homer	-225.2	0.1923	-4.829	0.0972
BORIS(Zf)/K562-CTCFL-ChIP-Seq(GSE32465)/Homer	-224.2	0.1226	-20.39	0.1213
E2F1(E2F)/Hela-E2F1-ChIP-Seq(GSE22478)/Homer	-219.7	0.1269	-6.18	0.0759
SHN3(AP2EREBP)/col-SHN3-DAP-Seq(GSE60143)/Homer	-217.2	0.1802	-5.158	0.0769
KLF6(Zf)/PDAC-KLF6-ChIP-Seq(GSE64557)/Homer	-206.2	0.4425	-47.57	0.4917
Zfp57(Zf)/H1-ZFP57.HA-ChIP-Seq(GSE115387)/Homer	-204.9	0.1663	-2.778	0.1028
DREB19(AP2EREBP)/colamp-DREB19-DAP-Seq(GSE60143)/Homer	-203.5	0.1531	-3.231	0.1065
ERF1(AP2EREBP)/colamp-ERF1-DAP-Seq(GSE60143)/Homer	-198.8	0.2377	-7.241	0.1352
E2F7(E2F)/Hela-E2F7-ChIP-Seq(GSE32673)/Homer	-197.9	0.0696	-7.501	0.0435
NRF1(NRF)/MCF7-NRF1-ChIP-Seq(Unpublished)/Homer	-196.7	0.0904	-1.613	0.0389
ERF2(AP2EREBP)/colamp-ERF2-DAP-Seq(GSE60143)/Homer	-190.3	0.2482	-6.296	0.1407
Fosl2(bZIP)/3T3L1-Fosl2-ChIP-Seq(GSE56872)/Homer	-187.4	0.1131	-16.24	0.1426
CRF4(AP2EREBP)/colamp-CRF4-DAP-Seq(GSE60143)/Homer	-180.9	0.227	-4.395	0.1287
ERF3(AP2EREBP)/colamp-ERF3-DAP-Seq(GSE60143)/Homer	-179.6	0.2312	-5.104	0.1352
CAMTA1(CAMTA)/col-CAMTA1-DAP-Seq(GSE60143)/Homer	-179.3	0.1533	-2.689	0.0944
AT3G58630(Trihelix)/col-AT3G58630-DAP-Seq(GSE60143)/Homer	-178.1	0.0769	-5.019	0.0426
At1g36060(AP2EREBP)/colamp-At1g36060-DAP-Seq(GSE60143)/Homer	-175	0.1762	-4.338	0.1306
Sp2(Zf)/HEK293-Sp2.eGFP-ChIP-Seq(Encode)/Homer	-175	0.5393	-37.16	0.5833
ERF73(AP2EREBP)/col-ERF73-DAP-Seq(GSE60143)/Homer	-174.6	0.2487	-5.239	0.1398
RAP212(AP2EREBP)/col-RAP212-DAP-Seq(GSE60143)/Homer	-170.1	0.2408	-6.878	0.1528
At4g28140(AP2EREBP)/colamp-At4g28140-DAP-Seq(GSE60143)/Homer	-169.4	0.1021	-1.456	0.0565
ESE1(AP2EREBP)/col-ESE1-DAP-Seq(GSE60143)/Homer	-167.6	0.2562	-4.859	0.1444
E2F6(E2F)/Hela-E2F6-ChIP-Seq(GSE31477)/Homer	-166.8	0.2243	-4.15	0.1648
RRTF1(AP2EREBP)/colamp-RRTF1-DAP-Seq(GSE60143)/Homer	-165.8	0.0865	-5.605	0.0574
Bach2(bZIP)/OCILy7-Bach2-ChIP-Seq(GSE44420)/Homer	-162.8	0.0733	-17.2	0.0972
Nr5a2(NR)/Pancreas-LRH1-ChIP-Seq(GSE34295)/Homer	-162.6	0.2942	-7.717	0.3213
COUP-TFII(NR)/K562-NR2F1-ChIP-Seq(Encode)/Homer	-160.4	0.4588	-13.8	0.5269
Bach1(bZIP)/K562-Bach1-ChIP-Seq(GSE31477)/Homer	-158.3	0.0266	-14.38	0.0352
NF-E2(bZIP)/K562-NFE2-ChIP-Seq(GSE31477)/Homer	-153.7	0.0281	-15.02	0.0398
Elk4(ETS)/Hela-Elk4-ChIP-Seq(GSE31477)/Homer	-153.2	0.2481	-23.33	0.262
EAR2(NR)/K562-NR2F6-ChIP-Seq(Encode)/Homer	-150.5	0.4305	-7.089	0.4731
ELF1(ETS)/Jurkat-ELF1-ChIP-Seq(SRA014231)/Homer	-150.4	0.2379	-12.23	0.2306
CTCF(Zf)/CD4+-CTCF-ChIP-Seq(Barski_et_al.)/Homer	-148.8	0.0737	-24.35	0.1
ERF11(AP2EREBP)/col-ERF11-DAP-Seq(GSE60143)/Homer	-148.6	0.2613	-4.062	0.1611
Nrf2(bZIP)/Lymphoblast-Nrf2-ChIP-Seq(GSE37589)/Homer	-148.2	0.0244	-10.98	0.0315
ERF10(AP2EREBP)/col-ERF10-DAP-Seq(GSE60143)/Homer	-145.1	0.2436	-2.521	0.1435
FHY3(FAR1)/Arabidopsis-FHY3-ChIP-Seq(GSE30711)/Homer	-144.5	0.1299	-2.223	0.0741
AS2(LOBAS2)/col-AS2-DAP-Seq(GSE60143)/Homer	-143.7	0.0434	-2.451	0.0157
Fra2(bZIP)/Striatum-Fra2-ChIP-Seq(GSE43429)/Homer	-141.5	0.1422	-13.35	0.1787
HINFP(Zf)/K562-HINFP.eGFP-ChIP-Seq(Encode)/Homer	-141.5	0.162	-3.972	0.0963
Egr2(Zf)/Thymocytes-Egr2-ChIP-Seq(GSE34254)/Homer	-135.4	0.101	-4.981	0.0787
Gata1(Zf)/K562-GATA1-ChIP-Seq(GSE18829)/Homer	-134.7	0.1829	-1.084	0.1787
DREB2(AP2EREBP)/col-DREB2-DAP-Seq(GSE60143)/Homer	-130.3	0.1248	-1.439	0.0833
ERF104(AP2EREBP)/col-ERF104-DAP-Seq(GSE60143)/Homer	-126.7	0.286	-7.289	0.188
FAR1(FAR1)/col-FAR1-DAP-Seq(GSE60143)/Homer	-125.7	0.0589	-1.722	0.0278
At4g16750(AP2EREBP)/col-At4g16750-DAP-Seq(GSE60143)/Homer	-125.5	0.1798	-2.251	0.1333
NRF(NRF)/Promoter/Homer	-125.2	0.092	-0.804	0.0509
Zfp281(Zf)/ES-Zfp281-ChIP-Seq(GSE81042)/Homer	-124.3	0.1399	-23.95	0.1741
Rap210(AP2EREBP)/col-Rap210-DAP-Seq(GSE60143)/Homer	-120.1	0.1428	-2.934	0.1009
Gata2(Zf)/K562-GATA2-ChIP-Seq(GSE18829)/Homer	-119.8	0.2003	-0.4362	0.1898
Zic3(Zf)/mES-Zic3-ChIP-Seq(GSE37889)/Homer	-119.8	0.2489	-89.24	0.3815
ANAC042(NAC)/col-ANAC042-DAP-Seq(GSE60143)/Homer	-118.8	0.2029	-5.217	0.1194
bHLH74(bHLH)/col-bHLH74-DAP-Seq(GSE60143)/Homer	-118.2	0.091	-3.503	0.075
AT3G57600(AP2EREBP)/col-AT3G57600-DAP-Seq(GSE60143)/Homer	-113.3	0.2608	-3.977	0.1657
DEL2(E2FDP)/col-DEL2-DAP-Seq(GSE60143)/Homer	-112.1	0.1321	-5.764	0.112
At1g22810(AP2EREBP)/colamp-At1g22810-DAP-Seq(GSE60143)/Homer	-112	0.1156	-1.973	0.0787
E-box(bHLH)/Promoter/Homer	-112	0.039	-4.665	0.0306
Fra1(bZIP)/BT549-Fra1-ChIP-Seq(GSE46166)/Homer	-110.3	0.1549	-12.9	0.1981
JunB(bZIP)/DendriticCells-Junb-ChIP-Seq(GSE36099)/Homer	-109.9	0.1582	-15.42	0.2046
TGA5(bZIP)/col-TGA5-DAP-Seq(GSE60143)/Homer	-106.9	0.0333	-6.101	0.0352
ZBTB33(Zf)/GM12878-ZBTB33-ChIP-Seq(GSE32465)/Homer	-106.4	0.0285	-0.9083	0.0083
GABPA(ETS)/Jurkat-GABPa-ChIP-Seq(GSE17954)/Homer	-106	0.3394	-12.59	0.3722
CBF1(AP2EREBP)/colamp-CBF1-DAP-Seq(GSE60143)/Homer	-105.8	0.1689	-2.062	0.1241
GFY-Staf(?,Zf)/Promoter/Homer	-104.8	0.0302	-12.66	0.0343
CBF4(AP2EREBP)/colamp-CBF4-DAP-Seq(GSE60143)/Homer	-103.4	0.1679	-2.688	0.125
DDF1(AP2EREBP)/col-DDF1-DAP-Seq(GSE60143)/Homer	-103	0.0954	-4.648	0.075
CRE(bZIP)/Promoter/Homer	-102.9	0.0843	-1.273	0.063
ERF38(AP2EREBP)/col-ERF38-DAP-Seq(GSE60143)/Homer	-101	0.1174	-1.275	0.075
LBD13(LOBAS2)/colamp-LBD13-DAP-Seq(GSE60143)/Homer	-100.5	0.2709	-2.375	0.1963
ABR1(AP2EREBP)/colamp-ABR1-DAP-Seq(GSE60143)/Homer	-100.2	0.2766	-5.37	0.1972
JunD(bZIP)/K562-JunD-ChIP-Seq/Homer	-99.04	0.035	-2.171	0.0287
LBD23(LOBAS2)/colamp-LBD23-DAP-Seq(GSE60143)/Homer	-98.55	0.2703	-6.891	0.2278
ZNF519(Zf)/HEK293-ZNF519.GFP-ChIP-Seq(GSE58341)/Homer	-96.93	0.1129	-3.666	0.0852
Zfp809(Zf)/ES-Zfp809-ChIP-Seq(GSE70799)/Homer	-96.77	0.0977	-2.175	0.0769
DEAR2(AP2EREBP)/colamp-DEAR2-DAP-Seq(GSE60143)/Homer	-95.97	0.2566	-2.24	0.2
CEJ1(AP2EREBP)/col-CEJ1-DAP-Seq(GSE60143)/Homer	-95.28	0.232	-1.563	0.1815
CBF2(AP2EREBP)/colamp-CBF2-DAP-Seq(GSE60143)/Homer	-94.86	0.1207	-3.656	0.0963
Atf3(bZIP)/GBM-ATF3-ChIP-Seq(GSE33912)/Homer	-93.14	0.1814	-12	0.2306
At5g08750(C3H)/col-At5g08750-DAP-Seq(GSE60143)/Homer	-92.86	0.135	-3.057	0.112
GFY(?)/Promoter/Homer	-92.44	0.0321	-11.37	0.0389
RFX(HTH)/K562-RFX3-ChIP-Seq(SRA012198)/Homer	-90.15	0.0406	-1.549	0.0287
DREB26(AP2EREBP)/col-DREB26-DAP-Seq(GSE60143)/Homer	-89.59	0.0816	-1.238	0.0444
Sox9(HMG)/Limb-SOX9-ChIP-Seq(GSE73225)/Homer	-89.03	0.3019	-2.8e-05	0.2463
c-Myc(bHLH)/LNCAP-cMyc-ChIP-Seq(Unpublished)/Homer	-88.21	0.1643	-1.939	0.1306
AT1G77200(AP2EREBP)/colamp-AT1G77200-DAP-Seq(GSE60143)/Homer	-88.13	0.1896	-2.578	0.1491
TINY(AP2EREBP)/col-TINY-DAP-Seq(GSE60143)/Homer	-87.82	0.065	-1.445	0.0407
CBF3(AP2EREBP)/colamp-CBF3-DAP-Seq(GSE60143)/Homer	-87.46	0.1199	-3.054	0.0917
DPL-1(E2F)/cElegans-Adult-ChIP-Seq(modEncode)/Homer	-87.06	0.2507	-3.518	0.1648
AT3G16280(AP2EREBP)/colamp-AT3G16280-DAP-Seq(GSE60143)/Homer	-86.86	0.0867	-2.118	0.0611
TGA3(bZIP)/colamp-TGA3-DAP-Seq(GSE60143)/Homer	-86.86	0.0227	-4.232	0.0222
bHLH10(bHLH)/colamp-bHLH10-DAP-Seq(GSE60143)/Homer	-85.89	0.069	-1.725	0.0454
At4g31060(AP2EREBP)/colamp-At4g31060-DAP-Seq(GSE60143)/Homer	-85.62	0.0977	-0.9676	0.0667
ETS1(ETS)/Jurkat-ETS1-ChIP-Seq(GSE17954)/Homer	-85.51	0.3551	-7.011	0.3926
HY5(bZIP)/colamp-HY5-DAP-Seq(GSE60143)/Homer	-84.61	0.2056	-1.68	0.1852
Elk1(ETS)/Hela-Elk1-ChIP-Seq(GSE31477)/Homer	-84.45	0.247	-21.4	0.2676
ETS(ETS)/Promoter/Homer	-83.99	0.153	-8.039	0.15
AT1G12630(AP2EREBP)/colamp-AT1G12630-DAP-Seq(GSE60143)/Homer	-83.9	0.1219	-2.743	0.0917
CRF10(AP2EREBP)/col100-CRF10-DAP-Seq(GSE60143)/Homer	-81.91	0.289	-3.504	0.1806
RAP26(AP2EREBP)/colamp-RAP26-DAP-Seq(GSE60143)/Homer	-81.47	0.3028	-4.165	0.2148
AP-1(bZIP)/ThioMac-PU.1-ChIP-Seq(GSE21512)/Homer	-81.44	0.2004	-8.051	0.2491
c-Jun-CRE(bZIP)/K562-cJun-ChIP-Seq(GSE31477)/Homer	-81.2	0.0941	-4.651	0.1019
AT1G44830(AP2EREBP)/col-AT1G44830-DAP-Seq(GSE60143)/Homer	-81.12	0.1002	-1.147	0.0611
Rfx2(HTH)/LoVo-RFX2-ChIP-Seq(GSE49402)/Homer	-80.68	0.0428	-1.146	0.0306
ERF4(AP2EREBP)/colamp-ERF4-DAP-Seq(GSE60143)/Homer	-79.31	0.2841	-2.702	0.1907
AT3G60490(AP2EREBP)/colamp-AT3G60490-DAP-Seq(GSE60143)/Homer	-79.11	0.0708	-1.568	0.0444
ERF8(AP2EREBP)/colamp-ERF8-DAP-Seq(GSE60143)/Homer	-78.64	0.2846	-1.564	0.1843
Gata6(Zf)/HUG1N-GATA6-ChIP-Seq(GSE51936)/Homer	-78.1	0.2536	-0.282	0.2519
EBF1(EBF)/Near-E2A-ChIP-Seq(GSE21512)/Homer	-77.05	0.3793	-0.2077	0.3472
Stat3(Stat)/mES-Stat3-ChIP-Seq(GSE11431)/Homer	-76.97	0.1867	-11.27	0.2231
ABI5(bZIP)/col-ABI5-DAP-Seq(GSE60143)/Homer	-76.72	0.1192	-1.128	0.0972
BATF(bZIP)/Th17-BATF-ChIP-Seq(GSE39756)/Homer	-75.6	0.1794	-10.15	0.2278
PIF7(bHLH)/col-PIF7-DAP-Seq(GSE60143)/Homer	-75.44	0.069	-4.085	0.0657
TFE3(bHLH)/MEF-TFE3-ChIP-Seq(GSE75757)/Homer	-73.16	0.035	-2.623	0.0296
Atf2(bZIP)/3T3L1-Atf2-ChIP-Seq(GSE56872)/Homer	-72.21	0.1027	-4.152	0.1111
BIM3(bHLH)/col-BIM3-DAP-Seq(GSE60143)/Homer	-71.81	0.046	-2.449	0.0398
PUCHI(AP2EREBP)/colamp-PUCHI-DAP-Seq(GSE60143)/Homer	-71.46	0.2353	-4.696	0.1269
E2F3(E2F)/MEF-E2F3-ChIP-Seq(GSE71376)/Homer	-71.22	0.2512	-7.046	0.2083
COUP-TFII(NR)/Artia-Nr2f2-ChIP-Seq(GSE46497)/Homer	-71.16	0.5077	-6.192	0.5639
DEAR5(AP2EREBP)/col-DEAR5-DAP-Seq(GSE60143)/Homer	-70.78	0.0455	-0.2759	0.0213
Six4(Homeobox)/MCF7-SIX4-ChIP-Seq(Encode)/Homer	-70.26	0.0218	-12.17	0.0352
DEAR3(AP2EREBP)/colamp-DEAR3-DAP-Seq(GSE60143)/Homer	-68.96	0.0826	-1.68	0.0602
EWS:FLI1-fusion(ETS)/SK_N_MC-EWS:FLI1-ChIP-Seq(SRA014231)/Homer	-67.98	0.2074	-17.02	0.2676
At1g77640(AP2EREBP)/col-At1g77640-DAP-Seq(GSE60143)/Homer	-67.61	0.0593	-0.3013	0.0296
FXR(NR),IR1/Liver-FXR-ChIP-Seq(Chong_et_al.)/Homer	-67.28	0.147	-0.1963	0.125
SeqBias: A/T bias	-64.92	0.9566	-0.1272	0.9778
E2FA(E2FDP)/colamp-E2FA-DAP-Seq(GSE60143)/Homer	-64.47	0.1588	-5	0.1241
MYB98(MYB)/col-MYB98-DAP-Seq(GSE60143)/Homer	-63.86	0.0791	-1.886	0.0759
E-box/Arabidopsis-Promoters/Homer	-63.25	0.1416	-1.226	0.1231
bHLH28(bHLH)/col-bHLH28-DAP-Seq(GSE60143)/Homer	-62.21	0.0625	-0.1136	0.0398
TGA6(bZIP)/colamp-TGA6-DAP-Seq(GSE60143)/Homer	-61.93	0.1462	-1.784	0.1398
TGA1(bZIP)/colamp-TGA1-DAP-Seq(GSE60143)/Homer	-61.03	0.1084	-2.207	0.1083
GFX(?)/Promoter/Homer	-60.96	0.0099	-0.5449	0.0019
bZIP28(bZIP)/col-bZIP28-DAP-Seq(GSE60143)/Homer	-60.44	0.0743	-0.3593	0.0556
Unknown3/Arabidopsis-Promoters/Homer	-59.78	0.0573	-4.417	0.0565
Cbf1(bHLH)/Yeast-Cbf1-ChIP-Seq(GSE29506)/Homer	-58.2	0.0928	-3.515	0.0889
TGA2(bZIP)/colamp-TGA2-DAP-Seq(GSE60143)/Homer	-57.02	0.1413	-1.201	0.1231
AREB3(bZIP)/col-AREB3-DAP-Seq(GSE60143)/Homer	-55.91	0.0818	-1.137	0.0713
Atf7(bZIP)/3T3L1-Atf7-ChIP-Seq(GSE56872)/Homer	-55.28	0.1377	-3.428	0.15
ELF3(ETS)/PDAC-ELF3-ChIP-Seq(GSE64557)/Homer	-54.89	0.2487	-3.895	0.2787
USF1(bHLH)/GM12878-Usf1-ChIP-Seq(GSE32465)/Homer	-54.2	0.1485	-1.612	0.1398
Nur77(NR)/K562-NR4A1-ChIP-Seq(GSE31363)/Homer	-54.12	0.0609	-19.39	0.0991
HIF2a(bHLH)/785_O-HIF2a-ChIP-Seq(GSE34871)/Homer	-53.81	0.1126	-0.1754	0.0815
At2g44940(AP2EREBP)/colamp-At2g44940-DAP-Seq(GSE60143)/Homer	-53.11	0.0504	-1.365	0.0352
Gata4(Zf)/Heart-Gata4-ChIP-Seq(GSE35151)/Homer	-52.22	0.2761	-0.2417	0.2824
TGA4(bZIP)/colamp-TGA4-DAP-Seq(GSE60143)/Homer	-50.11	0.0736	-3.008	0.0769
TCFL2(HMG)/K562-TCF7L2-ChIP-Seq(GSE29196)/Homer	-39.71	0.0337	-113.1	0.1296
Tcf7(HMG)/GM12878-TCF7-ChIP-Seq(Encode)/Homer	-28.11	0.1085	-54.7	0.2148
Unknown-ESC-element(?)/mES-Nanog-ChIP-Seq(GSE11724)/Homer	-22.93	0.2111	-82.32	0.3787
Zic(Zf)/Cerebellum-ZIC1.2-ChIP-Seq(GSE60731)/Homer	-20.05	0.2825	-55.87	0.4389
Tcf4(HMG)/Hct116-Tcf4-ChIP-Seq(SRA012054)/Homer	-19.33	0.1433	-64.86	0.2852
Tcf3(HMG)/mES-Tcf3-ChIP-Seq(GSE11724)/Homer	-15.1	0.0823	-93.08	0.2194

## Sheet: Clusters
Motif	logP_Cluster1	Frequency_Cluster1	logP_Cluster2	Frequency_Cluster2	logP_Cluster3	Frequency_Cluster3	logP_Cluster4	Frequency_Cluster4
OCT4-SOX2-TCF-NANOG(POU,Homeobox,HMG)/mES-Oct4-ChIP-Seq(GSE11431)/Homer	-1127	0.4043	-339.9	0.2025	-290.4	0.1598	-84.39	0.0957
Oct4(POU,Homeobox)/mES-Oct4-ChIP-Seq(GSE11431)/Homer	-306.2	0.331	-154.2	0.2667	-80.88	0.2052	-132.6	0.2138
Brn1(POU,Homeobox)/NPC-Brn1-ChIP-Seq(GSE35496)/Homer	-289.8	0.2652	-188	0.2223	-81.86	0.1571	-111.6	0.1612
Oct6(POU,Homeobox)/NPC-Pou3f1-ChIP-Seq(GSE35496)/Homer	-268.7	0.3036	-146	0.254	-60.8	0.1887	-58.06	0.1876
KLF5(Zf)/LoVo-KLF5-ChIP-Seq(GSE49402)/Homer	-247.2	0.4686	-110.2	0.4419	-494.4	0.5971	-208.4	0.6565
KLF6(Zf)/PDAC-KLF6-ChIP-Seq(GSE64557)/Homer	-214.1	0.378	-85.35	0.3541	-353.1	0.4784	-163.6	0.5788
Sox3(HMG)/NPC-Sox3-ChIP-Seq(GSE33059)/Homer	-205	0.6363	-118.9	0.6022	-528	0.7402	-253.4	0.6501
EKLF(Zf)/Erythrocyte-Klf1-ChIP-Seq(GSE20478)/Homer	-202.4	0.1603	-111.9	0.1263	-414.5	0.2069	-171.2	0.1584
Klf4(Zf)/mES-Klf4-ChIP-Seq(GSE11431)/Homer	-193.4	0.2082	-117.2	0.1909	-451.6	0.289	-283.8	0.3047
Sox2(HMG)/mES-Sox2-ChIP-Seq(GSE11431)/Homer	-188.1	0.4112	-142.4	0.4008	-724	0.5567	-334.7	0.4451
Oct11(POU,Homeobox)/NCIH1048-POU2F3-ChIP-seq(GSE115123)/Homer	-178.3	0.2093	-133.6	0.1849	-81.87	0.1473	-178	0.1641
KLF3(Zf)/MEF-Klf3-ChIP-Seq(GSE44748)/Homer	-157.8	0.2035	-124.5	0.2208	-563.8	0.3376	-398	0.4125
Sp2(Zf)/HEK293-Sp2.eGFP-ChIP-Seq(Encode)/Homer	-155.9	0.4344	-98.14	0.4572	-363	0.5924	-226.2	0.7016
ERRg(NR)/Kidney-ESRRG-ChIP-Seq(GSE104905)/Homer	-143.6	0.3511	-110.8	0.3437	-337	0.449	-131.6	0.3974
Esrrb(NR)/mES-Esrrb-ChIP-Seq(GSE11431)/Homer	-141.1	0.3126	-117.6	0.3048	-346.5	0.3972	-119.3	0.3282
Sox17(HMG)/Endoderm-Sox17-ChIP-Seq(GSE61475)/Homer	-138.8	0.3268	-96.67	0.3134	-536.6	0.448	-222.5	0.3488
Sox6(HMG)/Myotubes-Sox6-ChIP-Seq(GSE32627)/Homer	-138.7	0.5598	-71.14	0.5349	-415.3	0.6722	-157.3	0.5774
Oct2(POU,Homeobox)/Bcell-Oct2-ChIP-Seq(GSE21512)/Homer	-133.3	0.1803	-67.63	0.149	-45.13	0.1177	-79.07	0.1289
Sox10(HMG)/SciaticNerve-Sox3-ChIP-Seq(GSE35132)/Homer	-108.9	0.5451	-68.83	0.5372	-358.8	0.6764	-171.2	0.6081
Sox15(HMG)/CPA-Sox15-ChIP-Seq(GSE62909)/Homer	-107.2	0.4117	-79.22	0.4124	-534.1	0.5717	-204.4	0.4652
LEF1(HMG)/H1-LEF1-ChIP-Seq(GSE64758)/Homer	-100.2	0.3094	-37.6	0.2742	-173.1	0.3423	-31.73	0.2754
Nr5a2(NR)/Pancreas-LRH1-ChIP-Seq(GSE34295)/Homer	-96.8	0.3195	-66.41	0.3074	-234.2	0.4111	-47.77	0.3425
TEAD1(TEAD)/HepG2-TEAD1-ChIP-Seq(Encode)/Homer	-93.35	0.3537	-126.6	0.3986	-188.9	0.4166	-269.1	0.4484
TEAD4(TEA)/Tropoblast-Tead4-ChIP-Seq(GSE37350)/Homer	-92.17	0.3179	-142.9	0.3665	-184.1	0.3777	-307.6	0.4219
TEAD2(TEA)/Py2T-Tead2-ChIP-Seq(GSE55709)/Homer	-84.91	0.2261	-125.3	0.2615	-155.3	0.2658	-286.9	0.2931
Tcf3(HMG)/mES-Tcf3-ChIP-Seq(GSE11724)/Homer	-84.77	0.1539	-21.46	0.1147	-80.7	0.1456	-17.29	0.1105
Nr5a2(NR)/mES-Nr5a2-ChIP-Seq(GSE19019)/Homer	-82.52	0.2541	-73.18	0.2548	-236.5	0.3408	-93.54	0.3015
SF1(NR)/H295R-Nr5a1-ChIP-Seq(GSE44220)/Homer	-80.76	0.2409	-51.5	0.2211	-230.1	0.3164	-89.31	0.2637
Sp5(Zf)/mES-Sp5.Flag-ChIP-Seq(GSE72989)/Homer	-69.6	0.2662	-48.41	0.3044	-180.9	0.3944	-204.6	0.5668
KLF14(Zf)/HEK293-KLF14.GFP-ChIP-Seq(GSE58341)/Homer	-68.32	0.4391	-32.4	0.4752	-95.42	0.5654	-34.36	0.699
Tcf4(HMG)/Hct116-Tcf4-ChIP-Seq(SRA012054)/Homer	-65.67	0.2098	-26.95	0.189	-104.2	0.2324	-27.86	0.1957
TEAD3(TEA)/HepG2-TEAD3-ChIP-Seq(Encode)/Homer	-65.55	0.3748	-87.78	0.421	-124	0.437	-210.5	0.4841
RAR:RXR(NR),DR5/ES-RAR-ChIP-Seq(GSE56893)/Homer	-64.14	0.1181	-57.12	0.1098	-145	0.1468	-6.264	0.0144
TEAD(TEA)/Fibroblast-PU.1-ChIP-Seq(Unpublished)/Homer	-61.38	0.2509	-81.68	0.2854	-155.8	0.3106	-219.1	0.3242
Klf9(Zf)/GBM-Klf9-ChIP-Seq(GSE62211)/Homer	-61.16	0.145	-46.14	0.1666	-198.6	0.2324	-161.1	0.3253
Sox4(HMG)/proB-Sox4-ChIP-Seq(GSE50066)/Homer	-59.38	0.3057	-49.66	0.319	-327.6	0.448	-199.8	0.4011
TCFL2(HMG)/K562-TCF7L2-ChIP-Seq(GSE29196)/Homer	-53.29	0.0633	-31.51	0.0516	-74.54	0.0636	-28.39	0.0456
EAR2(NR)/K562-NR2F6-ChIP-Seq(Encode)/Homer	-52.18	0.3964	-34.81	0.4061	-127	0.5121	-44.57	0.5026
COUP-TFII(NR)/K562-NR2F1-ChIP-Seq(Encode)/Homer	-46.68	0.4175	-29.04	0.43	-106.6	0.5338	-40.47	0.5349
Sox9(HMG)/Limb-SOX9-ChIP-Seq(GSE73225)/Homer	-42.11	0.3121	-15.6	0.3022	-147.2	0.4111	-89.11	0.3824
Nrf2(bZIP)/Lymphoblast-Nrf2-ChIP-Seq(GSE37589)/Homer	-40.19	0.0337	-54.58	0.0359	-54.04	0.0344	-44.77	0.0274
COUP-TFII(NR)/Artia-Nr2f2-ChIP-Seq(GSE46497)/Homer	-36.41	0.4591	-28.24	0.4875	-63.23	0.5712	-24.2	0.5955
RARg(NR)/ES-RARg-ChIP-Seq(GSE30538)/Homer	-33.2	0.0638	-27.4	0.0575	-61.9	0.0723	-4.583	0.0428
Bach1(bZIP)/K562-Bach1-ChIP-Seq(GSE31477)/Homer	-32.64	0.0327	-54.55	0.0403	-49.76	0.0369	-39.91	0.0277
Zfp281(Zf)/ES-Zfp281-ChIP-Seq(GSE81042)/Homer	-25.05	0.087	-41.93	0.118	-59.13	0.1344	-64.82	0.2025
GABPA(ETS)/Jurkat-GABPa-ChIP-Seq(GSE17954)/Homer	-23.31	0.252	-10.24	0.2686	-13.87	0.3017	-99.05	0.4365
ETS1(ETS)/Jurkat-ETS1-ChIP-Seq(GSE17954)/Homer	-22.38	0.2941	-9.986	0.3082	-9.299	0.3423	-58.62	0.4508
NFE2L2(bZIP)/HepG2-NFE2L2-ChIP-Seq(Encode)/Homer	-22.04	0.0322	-33.19	0.0374	-50.31	0.0424	-17.81	0.0269
Unknown-ESC-element(?)/mES-Nanog-ChIP-Seq(GSE11724)/Homer	-20.94	0.1703	-40.95	0.2066	-98.41	0.276	-32.58	0.2721
Elk1(ETS)/Hela-Elk1-ChIP-Seq(GSE31477)/Homer	-19.04	0.1318	-13.64	0.1677	-17.99	0.18	-109.9	0.3467
Zic3(Zf)/mES-Zic3-ChIP-Seq(GSE37889)/Homer	-18.31	0.1434	-53.3	0.204	-146.1	0.272	-79.75	0.3253
ELF1(ETS)/Jurkat-ELF1-ChIP-Seq(SRA014231)/Homer	-16.12	0.1249	-16.12	0.1614	-21	0.1728	-128.3	0.3217
E2F7(E2F)/Hela-E2F7-ChIP-Seq(GSE32673)/Homer	-14.89	0.0195	-8.203	0.0265	-16.14	0.0269	-111.7	0.1069
Zic(Zf)/Cerebellum-ZIC1.2-ChIP-Seq(GSE60731)/Homer	-14.4	0.2145	-24.15	0.2656	-73.12	0.3348	-28.98	0.3712
ETS(ETS)/Promoter/Homer	-13.67	0.0854	-5.904	0.0994	-11.72	0.1104	-74.75	0.2109
Elk4(ETS)/Hela-Elk4-ChIP-Seq(GSE31477)/Homer	-12.33	0.1191	-11.77	0.1617	-24.02	0.1775	-173.5	0.3585
Sp1(Zf)/Promoter/Homer	-11	0.0316	-8.158	0.0579	-75.34	0.0813	-313.9	0.2797
AP-2alpha(AP2)/Hela-AP2alpha-ChIP-Seq(GSE31477)/Homer	-10.51	0.1618	-60.87	0.2634	-30.2	0.266	-307.4	0.5015
Tcfcp2l1(CP2)/mES-Tcfcp2l1-ChIP-Seq(GSE11431)/Homer	-10.36	0.0511	-3.204	0.0474	-67.84	0.0962	-28.66	0.09
E2FA(E2FDP)/colamp-E2FA-DAP-Seq(GSE60143)/Homer	-10.35	0.0585	-15.19	0.0997	-13.71	0.0942	-85.29	0.2356
Cbf1(bHLH)/Yeast-Cbf1-ChIP-Seq(GSE29506)/Homer	-9.83	0.0606	-37.55	0.0982	-67.02	0.1114	-128.6	0.1553
E2F1(E2F)/Hela-E2F1-ChIP-Seq(GSE22478)/Homer	-9.442	0.0264	-10.9	0.0508	-13.07	0.0451	-108.7	0.1837
AP-2gamma(AP2)/MCF7-TFAP2C-ChIP-Seq(GSE21234)/Homer	-8.685	0.2056	-57.16	0.3224	-25.87	0.3293	-268.5	0.5788
E2F4(E2F)/K562-E2F4-ChIP-Seq(GSE31477)/Homer	-6.678	0.0469	-33.05	0.1061	-16.27	0.0853	-180.4	0.3007
bHLH74(bHLH)/col-bHLH74-DAP-Seq(GSE60143)/Homer	-6.268	0.0416	-28.45	0.0736	-58.1	0.087	-158.1	0.1511
E2F6(E2F)/Hela-E2F6-ChIP-Seq(GSE31477)/Homer	-5.38	0.0712	-10.41	0.1177	-9.435	0.1209	-73.75	0.3108
RFX(HTH)/K562-RFX3-ChIP-Seq(SRA012198)/Homer	-4.788	0.0216	-7.791	0.0265	-20.52	0.0369	-75.45	0.0603
LBD23(LOBAS2)/colamp-LBD23-DAP-Seq(GSE60143)/Homer	-4.744	0.1123	-16.5	0.1786	-7.969	0.1663	-54.43	0.3691
DREB2(AP2EREBP)/col-DREB2-DAP-Seq(GSE60143)/Homer	-4.227	0.0453	-9.881	0.0699	-10.8	0.0748	-75.53	0.1833
SPDEF(ETS)/VCaP-SPDEF-ChIP-Seq(SRA014231)/Homer	-4.075	0.2567	-12.36	0.3164	-18.86	0.3628	-54.17	0.443
Rfx2(HTH)/LoVo-RFX2-ChIP-Seq(GSE49402)/Homer	-4.052	0.0232	-6.181	0.0295	-22.91	0.0424	-65.12	0.0625
E-box(bHLH)/Promoter/Homer	-4.047	0.0142	-10.56	0.0239	-32.63	0.0332	-74.17	0.0575
BIM3(bHLH)/col-BIM3-DAP-Seq(GSE60143)/Homer	-3.752	0.0216	-18.34	0.0396	-31.17	0.0469	-95.63	0.0777
DEL2(E2FDP)/col-DEL2-DAP-Seq(GSE60143)/Homer	-3.715	0.0532	-5.525	0.0799	-3.894	0.0763	-87.69	0.2019
At5g65130(AP2EREBP)/colamp-At5g65130-DAP-Seq(GSE60143)/Homer	-3.24	0.0158	-7.494	0.034	-7.706	0.0317	-57.43	0.1311
ERF2(AP2EREBP)/colamp-ERF2-DAP-Seq(GSE60143)/Homer	-3.102	0.0285	-5.773	0.0867	-3.514	0.0688	-51.96	0.334
bHLHE40(bHLH)/HepG2-BHLHE40-ChIP-Seq(GSE31477)/Homer	-2.843	0.0501	-23	0.0956	-38.84	0.1075	-109.9	0.1741
Pho4(bHLH)/Yeast-Pho4-ChIP-Seq(GSE29506)/Homer	-2.841	0.0327	-8.684	0.0534	-18.17	0.0621	-89.28	0.1188
TFE3(bHLH)/MEF-TFE3-ChIP-Seq(GSE75757)/Homer	-2.831	0.0179	-18.34	0.0325	-41.2	0.0419	-70.42	0.0565
bHLH34(bHLH)/colamp-bHLH34-DAP-Seq(GSE60143)/Homer	-2.373	0.0448	-18.44	0.0837	-20.02	0.091	-83.83	0.1476
GFY-Staf(?,Zf)/Promoter/Homer	-2.35	0.0127	-1.166	0.0131	-0.02531	0.0112	-63.3	0.0445
DREB19(AP2EREBP)/colamp-DREB19-DAP-Seq(GSE60143)/Homer	-2.345	0.0464	-11.52	0.0814	-11.94	0.0863	-92.39	0.2174
PIF7(bHLH)/col-PIF7-DAP-Seq(GSE60143)/Homer	-2.224	0.03	-13.65	0.0549	-44.06	0.0703	-111.8	0.1182
USF1(bHLH)/GM12878-Usf1-ChIP-Seq(GSE32465)/Homer	-2.114	0.0812	-21.71	0.1363	-44.45	0.1603	-83.66	0.2258
BIM1(bHLH)/colamp-BIM1-DAP-Seq(GSE60143)/Homer	-2.105	0.0163	-16.01	0.0344	-25.04	0.0389	-67.08	0.063
ERF1(AP2EREBP)/colamp-ERF1-DAP-Seq(GSE60143)/Homer	-2.051	0.0248	-4.767	0.0788	-4.202	0.0653	-53.64	0.3183
ERF104(AP2EREBP)/col-ERF104-DAP-Seq(GSE60143)/Homer	-1.978	0.0438	-5.551	0.1169	-4.735	0.1042	-52.42	0.3893
At1g78700(BZR)/col-At1g78700-DAP-Seq(GSE60143)/Homer	-1.678	0.0459	-10.88	0.0833	-21.32	0.0965	-53.53	0.1497
c-Myc(bHLH)/LNCAP-cMyc-ChIP-Seq(Unpublished)/Homer	-1.614	0.0601	-22.74	0.1248	-33.05	0.1336	-146.5	0.2654
DPL-1(E2F)/cElegans-Adult-ChIP-Seq(modEncode)/Homer	-1.171	0.0464	-5.515	0.1124	-1.18	0.096	-57.92	0.362
ESE1(AP2EREBP)/col-ESE1-DAP-Seq(GSE60143)/Homer	-1.151	0.0269	-5.61	0.0923	-1.928	0.0701	-60.65	0.3523
Ronin(THAP)/ES-Thap11-ChIP-Seq(GSE51522)/Homer	-1.115	0.0021	-0.6304	0.003	-0.1531	0.0025	-107.8	0.0325
At4g36780(BZR)/col-At4g36780-DAP-Seq(GSE60143)/Homer	-1.074	0.0438	-8.588	0.0803	-20.85	0.0957	-58.17	0.1503
CLOCK(bHLH)/Liver-Clock-ChIP-Seq(GSE39860)/Homer	-0.9893	0.0965	-7.36	0.1479	-17.71	0.1725	-56.69	0.25
ERF73(AP2EREBP)/col-ERF73-DAP-Seq(GSE60143)/Homer	-0.9352	0.0248	-7.707	0.0897	-3.599	0.0696	-64.95	0.338
RAP212(AP2EREBP)/col-RAP212-DAP-Seq(GSE60143)/Homer	-0.8468	0.0358	-5.602	0.096	-0.498	0.0753	-50.17	0.3262
GFY(?)/Promoter/Homer	-0.7137	0.0105	-0.3744	0.0131	-0.0507	0.0137	-57.19	0.0473
Pho2(bHLH)/Yeast-Pho2-ChIP-Seq(GSE29506)/Homer	-0.7055	0.0743	-2.858	0.1095	-14.42	0.1359	-58.15	0.2337
CRF10(AP2EREBP)/col100-CRF10-DAP-Seq(GSE60143)/Homer	-0.6256	0.0395	-3.84	0.118	-0.4376	0.0935	-59.46	0.4058
BORIS(Zf)/K562-CTCFL-ChIP-Seq(GSE32465)/Homer	-0.562	0.0332	-93.36	0.1147	-31	0.0843	-188.9	0.1881
GFX(?)/Promoter/Homer	-0.5147	0.0005	0	0	-0.01758	0.0002	-51.26	0.0178
LOB(LOBAS2)/col-LOB-DAP-Seq(GSE60143)/Homer	-0.4621	0.0074	-6.669	0.0325	-0.2034	0.0184	-68.95	0.1461
E-box/Arabidopsis-Promoters/Homer	-0.422	0.0569	-11.21	0.1113	-20.01	0.1254	-88.03	0.2226
CAMTA1(CAMTA)/col-CAMTA1-DAP-Seq(GSE60143)/Homer	-0.4074	0.029	-10.7	0.0803	-4.773	0.0663	-128.5	0.2379
CTCF(Zf)/CD4+-CTCF-ChIP-Seq(Barski_et_al.)/Homer	-0.1711	0.0227	-124.7	0.1012	-29.51	0.0661	-184.6	0.1231
At5g08750(C3H)/col-At5g08750-DAP-Seq(GSE60143)/Homer	-0.1693	0.0443	-13.04	0.0979	-5.807	0.0868	-57.94	0.1942
ABI5(bZIP)/col-ABI5-DAP-Seq(GSE60143)/Homer	-0.1566	0.0416	-6.748	0.0833	-16.18	0.095	-60.8	0.1794
HY5(bZIP)/colamp-HY5-DAP-Seq(GSE60143)/Homer	-0.1468	0.0886	-1.443	0.1427	-2.159	0.1571	-69.19	0.2983
AT3G58630(Trihelix)/col-AT3G58630-DAP-Seq(GSE60143)/Homer	-0.1274	0.0069	-3.324	0.0247	-2.795	0.0229	-55.36	0.1059
ANAC094(NAC)/col-ANAC094-DAP-Seq(GSE60143)/Homer	-0.1087	0.0084	-1.526	0.0344	-0.8926	0.0279	-88.05	0.1661
CRE(bZIP)/Promoter/Homer	-0.1023	0.0264	-4.348	0.0523	-0.6646	0.0489	-70.13	0.1191
ZBTB33(Zf)/GM12878-ZBTB33-ChIP-Seq(GSE32465)/Homer	-0.08973	0.0005	-0.2573	0.0034	-0.6449	0.003	-51.57	0.04
ANAC042(NAC)/col-ANAC042-DAP-Seq(GSE60143)/Homer	-0.08543	0.0153	-1.271	0.0657	-0.9304	0.0516	-52.92	0.2752
Zfp57(Zf)/H1-ZFP57.HA-ChIP-Seq(GSE115387)/Homer	-0.05621	0.0232	-5.016	0.0721	-5.37	0.0688	-92.71	0.239
SeqBias: A/T bias	-0.005092	0.9873	-4.865	0.9839	-0.1001	0.989	-91.28	0.9884
NRF1(NRF)/MCF7-NRF1-ChIP-Seq(Unpublished)/Homer	-0.001893	0.0032	-0.4213	0.0213	-0.269	0.0204	-118.7	0.1335
NRF(NRF)/Promoter/Homer	-0.000453	0.0095	-1.893	0.0392	-0.003906	0.0299	-69.67	0.1363
