# Supplementary material for: Dynamic regulation of chromatin accessibility by pluripotency transcription factors across the cell cycle
Source: eLife. 2019 Dec 3;8:e50087. doi: 10.7554/eLife.50087 (PMC6890464; doi:10.7554/eLife.50087)
Supplement: Supplementary file 3. — This file contains the top 500 features of the random forest model used to predict the cluster of regions based on overlap with ChIP-seq peaks from cistromeDB annotated as belonging to mouse ES cells. Importance values are derived from the model. Sample name, Factor, Cell line, and GSMID refer to sample data in GEO and ID refers to the sample ID in cistromeDB. Cluster 1–4 columns indicate fraction of regions overlapping the sample peaks. [file elife-50087-supp3.xlsx]

## Sheet: rfmodel_importance
Importance	Sample name	Factor	Cell line	GSMID	ID	Cluster 1	Cluster 2	Cluster 3	Cluster 4
3.07309	ZHBTC4_SS18_24hDOX_rep3	SS18	ZhBTc4	GSM2521513	75207	0.0991038	0.214046	0.344303	0.471666
2.98167	ZHBTC4_SOX2_24hDOX_rep3 (ChIP-Seq)	SOX2	ZhBTc4	GSM2341295	75237	0.105957	0.22189	0.380454	0.420316
2.18458	Oct4 ChIP-Seq at G1	POU5F1	E14	GSM2066252	68662	0.627833	0.371311	0.368487	0.210018
2.17472	ZHBTC4_NANOG_24hDOX_rep1 (ChIP-Seq)	NANOG	ZhBTc4	GSM2341299	75233	0.257248	0.310422	0.469708	0.400867
2.03253	H3K27ac_CM_Rep_1	H3K27ac	None	GSM1163102	33374	0.0838166	0.177811	0.190726	0.536589
2.02367	Rbp2 WT_H3K4me3_ChIPSeq	H3K4me3	None	GSM867826	56066	0.000527148	0.0298842	0.0189479	0.349237
2.00887	RA KO H3K4me3 rep2	H3K4me3	None	GSM1409791	49116	0.0010543	0.0833022	0.0478684	0.432629
1.96619	mES_H3K4me3_H2AZKD	H3K4me3	CMTi-1	GSM849941	37747	0.00158144	0.0623833	0.0381451	0.391633
1.95453	Oct4 ChIP-Seq at G2/M	POU5F1	E14	GSM2066253	68661	0.338429	0.150542	0.125156	0.0555478
1.94255	ZHBTC4_NANOG_24hDOX_rep2 (ChIP-Seq)	NANOG	ZhBTc4	GSM2341300	75232	0.114391	0.156518	0.29095	0.231006
1.91443	WT PILECs, H3K4me3 ChIP	H3K4me3	TC1	GSM928131	8983	0.00369004	0.0668659	0.0383944	0.421296
1.90812	EC-EA-3702-OCT4_MIT_1	POU5F1	None	GSM2438471	76350	0.390617	0.162495	0.171528	0.0887085
1.86236	VEGF_minus_48h_H3K4me3_Rep1	H3K4me3	None	GSM2486217	74514	0	0.0261487	0.00922463	0.313978
1.8586	Oct4_Otx2ko_tetON_Otx2_nodox	POU5F1	None	GSM1355180	48513	0.794412	0.542772	0.66168	0.599972
1.81124	H3K4me3.mESC-UTX+RA.2014_05_25	H3K4me3	None	GSM2035839	68140	0.00210859	0.0691072	0.0361506	0.417238
1.80074	WT_ESC_Oct4_ChIPseq_Rep1	POU5F1	None	GSM1910644	73466	0.43068	0.19238	0.232361	0.106198
1.77827	H3K27ac_CM_Rep_2	H3K27ac	None	GSM1163103	33381	0.0574591	0.14195	0.142359	0.511683
1.77345	PARP-1KO_ESC_Oct4_ChIPseq_Rep2	POU5F1	None	GSM1910647	73463	0.58408	0.347777	0.369235	0.283476
1.77186	ESC_H3K27ac	H3K27ac	None	GSM1005503	33703	0.00421719	0.0829287	0.0448766	0.435567
1.76809	ZHBTC4_OCT4_UNT_rep2 (ChIP-Seq)	POU5F1	ZhBTc4	GSM2341285	75247	0.451239	0.22189	0.248816	0.112495
1.73553	RPB2_PolII_ZT02_R1	POLR2B	R1	GSM1411206	49151	0.0263574	0.0963765	0.0752929	0.418078
1.72667	Mouse_ESCs_MLL1&MLL2_FC/FC_4d_atRA_H3K4me3	H3K4me3	None	GSM1276704	43410	0.00263574	0.0287635	0.021441	0.350497
1.72532	Scr-Kdm2b	KDM2B	E14	GSM1003597	34887	0.0516605	0.165484	0.135876	0.468168
1.72474	ChIP-Seq_Sox2_V65	SOX2	None	GSM1082341	40161	0.661044	0.360105	0.518574	0.249755
1.70421	EC-EA-3702-OCT4_MIT_2	POU5F1	None	GSM2438472	76349	0.399578	0.189391	0.190227	0.106198
1.68024	H3K4me3_Mll2KO	H3K4me3	None	GSM2073014	73291	0.0268846	0.0840493	0.0825231	0.429131
1.68021	mES_Pou5F1_2i	POU5F1	KH2	GSM1842743	55985	0.588297	0.299589	0.355772	0.193648
1.66578	H3K27Ac-AB2-P0-r1	H3K27ac	R1	GSM1915952	59087	0.00369004	0.0508031	0.0336574	0.381419
1.6603	Mouse_ESCs_MLL1-/-_4d_atRA_H3K4me3	H3K4me3	None	GSM1276702	43408	0.00316289	0.0765783	0.0471204	0.429411
1.65435	Mll2KO_EBD6_ChIP_H3K4me3	H3K4me3	None	GSM2779046	83807	0.000527148	0.0227867	0.0129643	0.349937
1.6479	H3K27Ac-AB2-P12-r1	H3K27ac	R1	GSM1915956	59091	0.00369004	0.0362346	0.0259287	0.352316
1.64377	AntiGFP_KD_Oct4	POU5F1	None	GSM1059012	41332	0.668424	0.396339	0.503864	0.411221
1.64361	2i_H3K4me3	H3K4me3	V6.5	GSM1487061	50468	0.0311017	0.0821815	0.0713039	0.417798
1.63476	Mll34dSET_H3K4me3_2	H3K4me3	Mouse embryonic stem cells	GSM2636039	82238	0.0242488	0.120284	0.0912491	0.466909
1.63207	H3K4me3.mESC+UTX+RA.2014_02_01	H3K4me3	V6.5	GSM2035837	68142	0.00421719	0.0997385	0.0620793	0.458374
1.62495	ChIP-Seq analysis of H3K4me3 in Myc-ESCs Sample 15	H3K4me3	None	GSM2130816	68585	0.0100158	0.0586477	0.0354026	0.366447
1.62436	sox2_mES_rep2	SOX2	V6.5	GSM307139	2900	0.633105	0.346657	0.499875	0.272422
1.61728	ChIP-Seq H3K4me3 F123	H3K4me3	None	GSM1487547	50482	0.00210859	0.0508031	0.0319122	0.384497
1.61283	H3K4me3_Mll2WT	H3K4me3	V6.5	GSM2073016	73290	0.0316289	0.116548	0.102718	0.451798
1.60496	WT_2i_mESC_ChIP_p300_2	EP300	None	GSM2433946	74532	0.872957	0.641016	0.814261	0.697775
1.60289	WT_2i_mESC_ChIP_p300_1	EP300	None	GSM2433945	74533	0.812862	0.536048	0.739965	0.616482
1.6009	H3K4me3-AB2-P21-r1	H3K4me3	R1	GSM1915976	59111	0.00685293	0.0881584	0.0521067	0.436267
1.59931	H3K27Ac-AB2-P12-CKO-r1	H3K27ac	R1	GSM1915954	59089	0.00579863	0.0508031	0.0361506	0.389534
1.59596	R-Foxd3CKO-Tam-H3K4me3 ChIP-rep2	H3K4me3	None	GSM1410388	57776	0.0305746	0.0937617	0.0805285	0.427172
1.59468	Mll2_Mll2WT_vector	KMT2D	V6.5	GSM2073032	73261	0.014233	0.0795667	0.0438793	0.399049
1.58053	ChIP-Seq analysis of PRDM15 in 2i Prdm15KO mES cells replicate 1	PRDM15	None	GSM2587044	81310	0.0231945	0.112813	0.0862628	0.437106
1.57011	Mouse_ESCs_MLL2-/-_4d_atRA_H3K4me3	H3K4me3	None	GSM1276703	43409	0.000527148	0.0194247	0.012715	0.331608
1.56542	H3K4me3_ChIPSeq Day3 Eomes pos. (DVM05)	H3K4me3	Mouse embryonic stem cells	GSM2759404	86496	0.0010543	0.0612626	0.0266766	0.389954
1.55657	H3K4me3-1	H3K4me3	None	GSM1124778	34099	0.0126516	0.0758312	0.0538519	0.405485
1.55479	ChIP-Seq Input of PRDM15 in 2i mES cells	PRDM15	None	GSM2587040	81307	0.0121244	0.0903997	0.0593368	0.401707
1.54718	mES_Pou5F1_Serum	POU5F1	KH2	GSM1842742	55984	0.459146	0.211431	0.222139	0.117252
1.53865	shGFP_H3K4me3	H3K4me3	V6.5	GSM1171628	39565	0.0616763	0.155024	0.133134	0.488876
1.53808	H3K4me3 ChIP-Seq in MLL3-/-;MLL4-/- ESCs	H3K4me3	None	GSM1220837	71731	0.00738007	0.0918939	0.0563451	0.436127
1.53709	Set1AdSET_EBD6_ChIP_H3K4me3_2	H3K4me3	None	GSM2629656	83866	0.000527148	0.0526709	0.0246821	0.386176
1.53678	H3K4me3.mESC-UTX+RA.2014_05_29	H3K4me3	None	GSM2035843	68136	0.00158144	0.0769518	0.0413862	0.423954
1.52543	WT_ESC_Oct4_ChIPseq_Rep2	POU5F1	None	GSM1910646	73464	0.68951	0.431453	0.507853	0.386316
1.52437	DE_H3K4me3 rep2	H3K4me3	None	GSM2467510	73354	0.0100158	0.0986179	0.0615807	0.440325
1.5208	E14_4d_atRA_H3K4me3	H3K4me3	E14	GSM1276701	43407	0.00158144	0.0556593	0.0289205	0.404505
1.51035	HA BRD2 +GATA1 r1	GATA1	R1	GSM1582440	51971	0.00474433	0.0653717	0.0354026	0.318315
1.50524	H3K4me3_ChIPSeq Day3 Eomes pos. (DVM23)	H3K4me3	Mouse embryonic stem cells	GSM2759419	82619	0.0100158	0.116548	0.0541012	0.436407
1.49841	oct4_mES_rep1	POU5F1	V6.5	GSM307137	2885	0.687401	0.437804	0.505111	0.406044
1.49688	Mouse_ESCs_MLL2_F/F_H3K4me3	H3K4me3	None	GSM1276700	43406	0.00685293	0.0769518	0.0563451	0.410662
1.49498	Sox2	SOX2	None	GSM1308179	44478	0.756985	0.495704	0.662927	0.451098
1.49352	s_2_BC8_Zfp57.fastq.gz	ZFP57	None	GSM1335222	53132	0.0205588	0.0952559	0.0680628	0.397649
1.49119	VEGF_minus_48h_H3K4me3_Rep2	H3K4me3	None	GSM2486218	74513	0	0.0276429	0.0102219	0.326711
1.48965	ES cell d7 H3K4me3 ChIP-seq	H3K4me3	None	GSM905447	39336	0.0479705	0.133358	0.10546	0.480341
1.48797	WT_EBD6_ChIP_H3K4me3_2	H3K4me3	None	GSM2629682	88255	0.00210859	0.0788196	0.038893	0.418217
1.48561	R_1_H3K4me3_ChIPSeq	H3K4me3	J1	GSM1385048	53164	0.0326832	0.101233	0.0815258	0.426613
1.4749	WT_ESC_Sox2_ChIPseq_Rep2	SOX2	None	GSM1910642	73468	0.659462	0.385133	0.53453	0.289912
1.46992	m_Escell_H3K4me3_M	H3K4me3	None	GSM535982	40285	0.0205588	0.110198	0.0782847	0.451938
1.46292	mES_Nanog_3p_2i_r1	NANOG	KH2	GSM1842750	55992	0.876647	0.641016	0.825979	0.650483
1.46269	H3K4me3_NonT	H3K4me3	None	GSM1499136	51384	0.0432261	0.109451	0.0992271	0.443963
1.46258	H3K4me3.mESC-UTX-RA.2014_05_25	H3K4me3	None	GSM2035838	68141	0.0158144	0.0933881	0.0650711	0.424934
1.45806	ESC_Jmjd2c	KDM4C	None	GSM1303741	43681	0.00527148	0.0605155	0.0361506	0.381699
1.45806	sox2_mES_rep1	SOX2	V6.5	GSM307138	2901	0.626779	0.339186	0.48367	0.261228
1.45652	PARP-1KO_ESC_Oct4_ChIPseq_Rep1	POU5F1	None	GSM1910645	73465	0.454929	0.242062	0.258788	0.195047
1.45283	p300_ESC_rep2	EP300	None	GSM1355153	48486	0.760675	0.499066	0.737472	0.521338
1.45233	ChIP-seq - mES - Pou5f1 - 12hr KD, 7SK ASO rep2	POU5F1	None	GSM1693787	67363	0.496574	0.298468	0.303914	0.223031
1.44028	HE_H3K27ac	H3K27ac	None	GSM1692795	61873	0.024776	0.104595	0.102967	0.461592
1.43724	bioDax1_R1	NR0B1	J1	GSM1183116	50095	0.581444	0.327606	0.533283	0.291731
1.43637	Mll4KO_2i_H3K4me3	H3K4me3	None	GSM2630406	87979	0.0210859	0.0776989	0.0673149	0.424934
1.43225	UtxKO + RA H3K4me3Â	H3K4me3	None	GSM969830	39707	0.00474433	0.0840493	0.0508601	0.433609
1.42362	Jmjd2b_KD_Oct4	POU5F1	None	GSM1059024	41344	0.560886	0.33022	0.382448	0.372604
1.42171	RA KO H3K4me3 rep1	H3K4me3	None	GSM1409790	49115	0.00158144	0.0799402	0.0441286	0.429551
1.4153	p300 ChIP-Seq from Tdg -/- mouse ES cells, replicate a	EP300	None	GSM1019080	36831	0.688455	0.415764	0.621042	0.367987
1.41382	Total RNA pol II ChIP-seq S194 WT R1	POLR2A	R1	GSM1961187	59358	0.0110701	0.0328726	0.030167	0.324752
1.41175	h3k4me3_dko.rep3_new	H3K4me3	None	GSM2111688	83473	0.00210859	0.08517	0.0473697	0.415839
1.40965	Mm_e14_H3K4me2_rep1	H3K4me2	E14	GSM1489709	52407	0.0379547	0.158013	0.115931	0.498811
1.409	ZHBTC4_OCT4_UNT_rep1 (ChIP-Seq)	POU5F1	ZhBTc4	GSM2341284	75248	0.540854	0.305939	0.349788	0.175318
1.40328	ESC_H3K4me3_rep1	H3K4me3	None	GSM1820138	56872	0.0316289	0.0829287	0.0715532	0.415699
1.39684	Control_H3K4me3_ChIPSeq_R1	H3K4me3	R1	GSM1563223	56310	0.0564048	0.193127	0.151334	0.522597
1.3914	E14.EZH2.b1	EZH2	E14	GSM1199182	41897	0.0216131	0.114307	0.0825231	0.409682
1.38826	Mm_e14_H3K27ac_rep1	H3K27ac	E14	GSM1489707	52405	0.0801265	0.184161	0.177013	0.528334
1.38655	mES_Sox2_24h_2i_r2	SOX2	KH2	GSM1842767	56009	0.376384	0.151662	0.247071	0.0966839
1.38566	h3k4me3_dko.rep1	H3K4me3	None	GSM2111687	83476	0	0.0414643	0.0216904	0.360991
1.38385	HE_H3K9ac	H3K9ac	None	GSM1692794	67972	0.0100158	0.0877848	0.0653204	0.44746
1.38329	Sox2KE_ES ChIP-seq B	SOX2	KH2	GSM1059853	33780	0.358988	0.316025	0.503366	0.581083
1.38319	p300 ChIP-Seq from Tdg fl/fl mouse ES cells, replicate a	EP300	None	GSM1019072	36829	0.565103	0.2839	0.474196	0.208619
1.38168	E14_Day6_H3K4me3_ChIP-seq	H3K4me3	E14	GSM881371	8890	0.0010543	0.0601419	0.0231862	0.381559
1.38129	Mll2_ab_CT2	KMT2D	V6.5	GSM2073022	73266	0.0801265	0.132611	0.129145	0.463971
1.37853	H3K27me3 ChIP (haploid)	H3K27me3	None	GSM2123548	73920_b	0.0495519	0.163242	0.10895	0.402966
1.37827	WT-H3K4me3_D0	H3K4me3	46C	GSM1604257	52805	0.0010543	0.0224131	0.0147095	0.306702
1.3768	05142008_209LAAAXX_B5	H3K9ac	V6.5	GSM896918	33712	0.0221402	0.0720956	0.0735477	0.388415
1.37594	WT H3K4me3 Chip-seq	H3K4me3	None	GSM1426322	54505	0.0437533	0.13037	0.104712	0.467469
1.36954	Chd2KO_H3K4me3_lot2	H3K4me3	None	GSM2537637	76371	0.0305746	0.0735898	0.0593368	0.392193
1.36351	mES_H3K4me3_24h_2i_r2	H3K4me3	KH2	GSM1842762	56004	0.0147601	0.0455734	0.0339068	0.352595
1.36247	UtxFlx H3K4me3	H3K4me3	None	GSM969836	39703	0.0195045	0.0974972	0.0727998	0.443543
1.35527	mEpiSC1000_Exp1	H3K4me3	None	GSM1444701	54544	0.0326832	0.0918939	0.0740464	0.417238
1.35274	J1_Ino80KD_Oct4	POU5F1	J1	GSM1234314	47517	0.24407	0.0803138	0.0827724	0.0260249
1.34401	h3k4me3.rep2	H3K4me3	mESC	GSM2111690	87673	0.00896152	0.100486	0.0588382	0.422555
1.34334	H3K4me3_ChIPSeq Day3 Eomes neg. (DVM03)	H3K4me3	Mouse embryonic stem cells	GSM2759402	86498	0.010543	0.116175	0.0578409	0.441304
1.34262	Mll2_Mll2_Y2602A_F1	KMT2D	V6.5	GSM2073025	73287	0.00896152	0.0657452	0.0403889	0.392053
1.34203	ES_H3K4me2_ChIPseq_rep2	H3K4me2	None	GSM747544	5942	0.0948867	0.212925	0.223136	0.533511
1.33996	ChIP_D3_0_E14_Rad21	RAD21	None	GSM2099829	82624	0.039009	0.194247	0.125405	0.484679
1.33988	mES_Oct4_H2AZKD	POU5F1	CMTi-1	GSM1047940	38630	0.451239	0.26709	0.26552	0.237722
1.33975	mESC_CFP1_rep2_UNT	CXXC1	Mouse embryonic stem cells	GSM2454339	82185	0.00158144	0.0246545	0.012715	0.298727
1.33412	ChIP-Seq_Nanog_V65	NANOG	None	GSM1082342	40158	0.675277	0.389242	0.571429	0.282356
1.33405	E14_Day0_H3K4me3_ChIP-seq	H3K4me3	E14	GSM881354	8875	0.00527148	0.0545387	0.0383944	0.386456
1.3318	H3K4me3_Mll2_mCXXC_F1	H3K4me3	V6.5	GSM2073006	73295	0.0432261	0.0982443	0.0977312	0.434868
1.32708	H3K4me3-ControlClone	H3K4me3	None	GSM2284182	71848	0.0716921	0.155771	0.156071	0.480761
1.32697	Nanog_mES_rep2	NANOG	V6.5	GSM307141	2862	0.582499	0.307807	0.472201	0.227368
1.32675	Nanog-ChIP	NANOG	None	GSM1436068	53243	0.551924	0.272693	0.379207	0.156289
1.32571	mES_H3K4me3_3p_2i_r1	H3K4me3	KH2	GSM1842758	56000	0.0210859	0.0530445	0.0533533	0.350077
1.32421	DE_H3K4me3 rep3	H3K4me3	None	GSM2467511	73353	0.00421719	0.0776989	0.0413862	0.415979
1.32274	RYBPfl/fl.YAF2KO_RING1B_OHT_rep1	RNF2	None	GSM2192989	71180	0.0311017	0.0989914	0.0685615	0.360991
1.32243	H3K4me3 ChIP-seq of Eed -/- mESC	H3K4me3	mESC	GSM2746079	88405	0.0173959	0.0825551	0.0680628	0.417658
1.32208	bioDax1_R2	NR0B1	J1	GSM1183117	50096	0.562467	0.322002	0.535278	0.302505
1.3209	ChIP_dCD_Rad21_rep2	RAD21	None	GSM2870309	85629	0.0295203	0.164363	0.10172	0.46509
1.31488	Asynchronous ChIP 2	SOX2	None	GSM2385225	71765	0.337902	0.150168	0.187484	0.0577865
1.31268	shLuc_H3K4me3_mESC_rep2	H3K4me3	R1	GSM1282137	43483	0.0458619	0.166604	0.147095	0.491815
1.3114	Nanog_mES_rep1	NANOG	V6.5	GSM307140	2863	0.581444	0.308928	0.460484	0.22415
1.30755	mES_RbBP5_shluc_ctrl_for_H2AZKD	RBBP5	CMTi-1	GSM849935	37750	0.0237217	0.0649981	0.0668163	0.381279
1.30698	T_Y88A_H3K4me3_ChIPseq	H3K4me3	None	GSM2470999	87749	0.0864523	0.213672	0.157068	0.51686
1.30502	shGFP_NCAPH2_1	NCAPH2	Mouse embryonic stem cells	GSM2111449	86593	0.0316289	0.0922675	0.0815258	0.426892
1.29859	Tfap2c_ChIPseq_ZHBTc4-TSC	TFAP2C	ZhBTc4	GSM1246723	43035	0.00579863	0.0466941	0.0406382	0.211138
1.29718	PARP-1KO_ESC_Sox2_ChIPseq_Rep2	SOX2	None	GSM1910643	73467	0.411703	0.184535	0.284966	0.139079
1.2956	mESC_H3K4me3_parental_rep1_TAM	H3K4me3	Mouse embryonic stem cells	GSM2454353	84736	0.0295203	0.116922	0.0984792	0.449139
1.29484	mES_Nanog_3p_2i_r2	NANOG	KH2	GSM1842754	55996	0.725356	0.461711	0.608576	0.347139
1.29144	E14_Day4_H3K4me3_ChIP-seq	H3K4me3	E14	GSM881362	8882	0	0.0328726	0.0154575	0.336225
1.29092	H3K4me3_shMenin_3	H3K4me3	V6.5	GSM2073019	73268	0.0279389	0.0941352	0.0887559	0.439065
1.28293	H3K4me3-C17orf96shRNA	C17orf96	E14	GSM1550781	52674	0.028466	0.113934	0.106707	0.451938
1.28033	AEBP2_244_wild_type_rep2_ChIPSeq	AEBP2	None	GSM2192644	69979	0.0163416	0.109451	0.0538519	0.387715
1.27909	KDM2Bfl/fl_KDM2B_untreated_rep2	KDM2B	MS12	GSM1272790	47759	0.017923	0.099365	0.0685615	0.407584
1.27908	mESC_H3K4me3	H3K4me3	None	GSM1423148	73876	0.0189773	0.092641	0.0755423	0.433469
1.2786	p300 ChIP-Seq from Tdg -/- mouse ES cells, replicate c	EP300	None	GSM1019082	36826	0.682657	0.408293	0.613563	0.383238
1.27585	ChIP-Seq for p300 in ES (129JAE-C57/B6) cells 2	EP300	V6.5	GSM594601	2821	0.694781	0.447142	0.655697	0.528613
1.27513	WT_ESC_Sox2_ChIPseq_Rep1	SOX2	None	GSM1910640	73470	0.634686	0.371685	0.543007	0.298727
1.27496	ChIP-Seq-mES-H2Bub Control	H2Bub	None	GSM2027602	72328	0.00738007	0.0347404	0.0291698	0.306982
1.27383	H3K4me3.mESC-UTX-RA.2014_05_29	H3K4me3	None	GSM2035842	68137	0.0152873	0.0997385	0.0765395	0.432489
1.27156	mES_H3K4me3_MLL4KD	H3K4me3	R1	GSM849955	37759	0.0237217	0.134852	0.103964	0.471527
1.26936	Sox2KE_ES ChIP-seq A	SOX2	KH2	GSM1059852	33792	0.288877	0.223011	0.417103	0.351336
1.26902	Sox2 ESC ChIP-Seq	SOX2	None	GSM1050291	34542	0.607802	0.327232	0.467215	0.267385
1.26518	Mll4dSET_FBS_H3K4me3	H3K4me3	None	GSM2630478	84423	0.042699	0.15353	0.121416	0.485239
1.26229	WT_2i_ChIP_H3K27ac	H3K27ac	None	GSM2416832	66760	0.714286	0.479641	0.671653	0.608367
1.26167	ES_H33_HA_H3K4me3_nChIPSeq	H3K4me3	C6	GSM487545	347	0.017923	0.0963765	0.0638245	0.427312
1.26012	Sall4-ChIP-in-WT-of-Sall-DKO	SALL4	E14	GSM2065694	71075	0.613073	0.351139	0.478185	0.256331
1.25973	mES_H2AZ_shluc_ctrl_for_MLL4KD	H2AZ	R1	GSM849952	37751	0.0395361	0.140456	0.125904	0.428991
1.25733	Mbd3 ChIP replicate 2	MBD3	None	GSM2264180	73907	0.506589	0.322749	0.4727	0.416818
1.25634	mES_H3K4me3_shluc_ctrl_for_MLL4KD_rpt	H3K4me3	R1	GSM1047955	38620	0.00158144	0.0407172	0.0264273	0.336925
1.25452	H3K4me3.mESC+UTX-RA.2014_02_01	H3K4me3	V6.5	GSM2035836	68143	0.0479705	0.163242	0.134131	0.485378
1.25053	mEpiSC1000_Exp2	H3K4me3	None	GSM1444702	54545	0.024776	0.0747105	0.0655697	0.407164
1.24752	H3K27Ac_ChIPSeq Day3 Eomes pos. (DVM06)	H3K27ac	Mouse embryonic stem cells	GSM2759405	86497	0.00790722	0.0489354	0.0346547	0.336085
1.24548	p300 ChIP-Seq from Tdg fl/fl mouse ES cells, replicate b	EP300	None	GSM1019073	36800	0.566684	0.297348	0.490651	0.300126
1.24314	R-Foxd3CKO-EtOH-H3K4me3 ChIP-rep2	H3K4me3	None	GSM1410376	57764	0.0495519	0.124019	0.115433	0.456135
1.24274	p300 ChIP-Seq from Tdg -/- mouse ES cells, replicate b	EP300	None	GSM1019081	36816	0.720084	0.462832	0.648965	0.451098
1.24254	WT_Mll4_1	KMT2B	None	GSM2630509	81871	0.553506	0.348151	0.536525	0.531552
1.23893	Oct4 ChIPseq	POU5F1	None	GSM2257273	76202	0.246705	0.122152	0.0914984	0.211557
1.23878	UtxFlx + RA H3K4me3Â	H3K4me3	None	GSM969829	39704	0.00369004	0.0874113	0.0555971	0.438366
1.23716	WT_ChIP_H3K4me3_3	H3K4me3	None	GSM2779043	83804	0.0263574	0.0743369	0.0688108	0.417518
1.23231	Chromatin-IP of K4Me3 in Dcr WT	SPI1	None	GSM1334367	48327	0.0289931	0.101606	0.0800299	0.441444
1.23222	dCD_H3K4me2_ChIPSeq.rep2	H3K4me2	R1	GSM2808663	82776	0.10543	0.276802	0.258788	0.575626
1.22709	Mll2_Mll2WT	KMT2D	V6.5	GSM2073033	73284	0.0100158	0.0780725	0.048367	0.402826
1.2264	DGCR8KO_H3K4me3	H3K4me3	None	GSM1487068	50475	0.0453347	0.115801	0.106956	0.437806
1.22252	ZHBTC4_NANOG_UNT_rep2 (ChIP-Seq)	NANOG	ZhBTc4	GSM2341297	75235	0.527675	0.30706	0.457741	0.246957
1.22187	IP_Pol II_Mock	POLR2A	None	GSM2520022	83511	0.0416447	0.053418	0.0673149	0.363929
1.22163	ZHBTC4_OCT4_UNT_rep3 (ChIP-Seq)	POU5F1	ZhBTc4	GSM2341286	75246	0.369004	0.15876	0.198454	0.0779348
1.21906	ESC_H3K4me3_1	H3K4me3	R1	GSM392055	2635	0.0347918	0.0896526	0.0723012	0.351756
1.2169	H3K4me3_Mll2_Y2602A_F1	H3K4me3	V6.5	GSM2073008	73293	0.0289931	0.0821815	0.0815258	0.43095
1.21607	E14_Day6_H3K4me2_ChIP-seq	H3K4me2	E14	GSM881370	8889	0.0827623	0.205454	0.160558	0.528334
1.21111	Sp1_E14_Flk1Plus	SP1	E14	GSM1267913	47755	0.0537691	0.0855435	0.0835203	0.390653
1.21053	Mm_e14_H3K27ac_rep2	H3K27ac	E14	GSM1489708	52406	0.0759093	0.162869	0.173273	0.51742
1.2067	Gli3FLAG_NPC_ChIP-seq	CHRM2	None	GSM1511110	54583	0.0210859	0.0519238	0.0398903	0.308101
1.20634	1000_ESC_H3K4me3_1	H3K4me3	None	GSM2465422	83399	0.00263574	0.0328726	0.0182	0.249755
1.20609	RUNX1ETO_floating_progenitors_ChIP-Seq	RUNX1	None	GSM1574787	55144	0.0258303	0.0881584	0.0730491	0.393032
1.20173	KDM2Bfl/fl_KDM2B_untreated_rep1	KDM2B	MS12	GSM1272789	47758	0.0205588	0.0986179	0.0693094	0.411641
1.19371	ESC_Oct4_ChIP_seq	POU5F1	None	GSM2417142	73603	0.863469	0.707135	0.729993	0.692318
1.1902	H3K4me3_ChIPSeq Day3 Eomes pos. (DVM14)	H3K4me3	Mouse embryonic stem cells	GSM2759411	82617	0.00263574	0.0918939	0.0341561	0.407584
1.18994	WT_MES_H3K27ac	H3K27ac	J1	GSM1359831	50192	0.0268846	0.0889055	0.0845176	0.434868
1.18961	J1_NT_Oct4	POU5F1	J1	GSM1234309	47512	0.227201	0.0694808	0.0807779	0.020708
1.18837	wtES_Dox_H3Ac_1	H3K9ac, H3K14ac	E14	GSM1294873	47909	0.0801265	0.135973	0.144353	0.435567
1.18786	Men1-KO PILECs, H3K4me3 ChIP	H3K4me3	3.2N	GSM928132	8984	0.00263574	0.0668659	0.0311643	0.41388
1.18204	mEpiSCbulk 2	H3K4me3	None	GSM1444700	54543	0.0189773	0.0915204	0.0633259	0.422695
1.18144	ChIP-seq - mES - Pou5f1 - 12hr KD, Control ASO rep2	POU5F1	None	GSM1693785	67365	0.271481	0.119537	0.118424	0.0568071
1.17975	DE_H3K4me3 rep1	H3K4me3	None	GSM2467509	73355	0.00158144	0.0586477	0.0274246	0.390374
1.1751	Oct4-ChIP	POU5F1	None	GSM1436067	53242	0.334212	0.137467	0.15258	0.0498111
1.17436	mES_H3K4me3_shluc_ctrl_for_H2AZKD	H3K4me3	CMTi-1	GSM849932	37748	0.0369004	0.13672	0.117676	0.470407
1.17296	Sox2 ChIP-seq, Oct3/4KO Day1	SOX2	ZhBTc4	GSM703187	43846	0.0242488	0.0466941	0.117178	0.108157
1.16783	h3k4me3_wt.rep3	H3K4me3	mESC	GSM2111692	87674	0.0189773	0.129996	0.0939915	0.458234
1.16696	ESC_H3K9ac_ChIP-Seq	H3K9ac	None	GSM2417092	73642	0.221402	0.316025	0.397158	0.618581
1.16392	ChIP-Seq_Oct4_V65	POU5F1	None	GSM1082340	40157	0.816025	0.58573	0.704313	0.63803
1.16375	Asynchronous ChIP 1	SOX2	None	GSM2385224	71766	0.59515	0.358984	0.498878	0.304603
1.16266	m_Escell_PolII_M	POLR2A	None	GSM535983	40283	0.0790722	0.113934	0.12715	0.442843
1.16172	Smad2/3 ChIP-Seq day 3 EB_Trp53+/+_SB431542	SMAD2/3	None	GSM1782929	72456	0.081708	0.0855435	0.0875093	0.354834
1.16137	AntiGFP_KD_Nanog	NANOG	None	GSM1059011	41331	0.804428	0.559208	0.745699	0.624038
1.16064	Set1AdSET_EBD6_ChIP_H3K4me3_1	H3K4me3	None	GSM2629655	83867	0	0.0395966	0.0169534	0.366168
1.15901	mES_Sox2_Serum_r1	SOX2	KH2	GSM1842763	56005	0.793358	0.570415	0.738469	0.646985
1.15512	C17orf96-scrambledshRNA	C17orf96	E14	GSM1550778	52671	0.010543	0.0470676	0.0378958	0.375962
1.15503	07282008_309NDAAXX_B1	H3K4me3	V6.5	GSM896922	33716	0.0168687	0.100859	0.0885066	0.433469
1.15392	ChIP-Seq for H3K4me3 in ES (129JAE-C57/B6) cells	H3K4me3	V6.5	GSM594581	2833	0.00474433	0.0388495	0.0314136	0.363229
1.15356	MES_H3K9ac	H3K9ac	None	GSM1692786	67976	0.0121244	0.064251	0.0508601	0.392053
1.15022	H3K4me3_mES_rep3	H3K4me3	V6.5	GSM307149	2834	0.0205588	0.10721	0.0865121	0.443683
1.14917	Sox2-ChIP	SOX2	None	GSM1436070	53245	0.269373	0.0971236	0.131139	0.0408563
1.14915	Sox2 ChIP-seq, Oct3/4KO Day0	SOX2	ZhBTc4	GSM703186	43845	0.338429	0.1356	0.232112	0.0909473
1.14801	bCatenin-FLAG	CTNNB1	V6.5	GSM1065517	38557	0.513442	0.27867	0.389678	0.247237
1.14558	Mll2_ab_CT1	KMT2D	V6.5	GSM2306658	73257	0.0595677	0.118043	0.0989778	0.447321
1.14374	Mll34dSET_H3K4me3_1	H3K4me3	Mouse embryonic stem cells	GSM2636038	82239	0.0353189	0.139709	0.116928	0.476843
1.14344	mESC1000_Exp1	H3K4me3	None	GSM1444698	54541	0.0448076	0.126634	0.107704	0.393592
1.14307	ChIP_D2_5_E14_Rad21	RAD21	None	GSM2099825	82629	0.107538	0.248412	0.194964	0.533371
1.14072	Sox2_ES ChIP-seq_B	SOX2	KH2	GSM1059851	33744	0.45282	0.263728	0.446273	0.261508
1.14047	R2a_fS248A_short	SOX2	2TS22C	GSM1704279	77440	0.370058	0.175196	0.250561	0.142158
1.14025	E14-2i_H3K4me3	H3K4me3	E14	GSM590112	9068	0.0184502	0.0343668	0.0373972	0.32783
1.13921	Mbd3 ChIP replicate 3	MBD3	None	GSM2264181	73906	0.457565	0.308181	0.44353	0.407863
1.1383	ChIP_D2_0_DKO_Rad21	RAD21	None	GSM2099845	83522	0.0701107	0.200971	0.155074	0.475024
1.13687	Mm_e14_H3K4me2_rep2	H3K4me2	E14	GSM1489710	52408	0.0869794	0.222264	0.185241	0.546803
1.13339	PolII_Nterm_shcMyc_ChIP_Seq	POLR2A	V6.5	GSM515675	2873	0.0332103	0.0679866	0.078534	0.402127
1.13299	H2AZ_WT ChIP-Seq	H2AZ	None	GSM1287699	67572	0.203479	0.315652	0.389928	0.623059
1.13229	Jmjd2c_KD_Oct4	POU5F1	None	GSM1059033	41353	0.724302	0.489727	0.58165	0.578984
1.13104	ZHBTC4_OCT4_24hDOX_rep1 (ChIP-Seq)	POU5F1	ZhBTc4	GSM2341287	75245	0.0353189	0.0694808	0.125156	0.163845
1.12909	Set1AdSET_ChIP_H3K4me3_1	H3K4me3	None	GSM2629649	87734	0.0295203	0.113186	0.0902518	0.44886
1.12674	mESC_H3K4me3_CFP1-GFP_SIDmut_rep1_TAM	H3K4me3	Mouse embryonic stem cells	GSM2454401	85032	0.108065	0.251401	0.223635	0.559256
1.1265	MBD3_-_-_ES_H3K4me3	H3K4me3	None	GSM1206842	36964	0.0342646	0.150915	0.106208	0.472646
1.12618	HE_H3K4me3	H3K4me3	None	GSM1692797	67970	0.00158144	0.0354875	0.0184493	0.309221
1.126	Sin3A_Abcam	SIN3A	None	GSM611196	87	0.0453347	0.0773254	0.105211	0.350077
1.12173	EC-EA-3702-OCT4_ASYN_1	POU5F1	None	GSM2438470	76351	0.224038	0.089279	0.0917477	0.0576466
1.12165	DKO_nonTsh_RA_ChIP_H3K4me3_Rep1	H3K4me3	None	GSM2588324	75349	0.0669478	0.146806	0.139367	0.474045
1.12131	H3K4me3_ChIP-seq	H3K4me3	None	GSM566276	3775	0.0152873	0.0821815	0.0690601	0.427872
1.12083	PolII_Nterm_shControl2_ChIP_Seq	POLR2A	V6.5	GSM515674	2874	0.042699	0.0638775	0.0810272	0.387575
1.11749	H3K4me3_mES_rep1	H3K4me3	V6.5	GSM307147	2836	0.0131787	0.0833022	0.0600848	0.420456
1.11727	ChIP-Seq for p300 in ES (129JAE-C57/B6) cells 1	EP300	V6.5	GSM594600	2822	0.6136	0.403063	0.61107	0.555058
1.11628	Tcf3_mES_rep1	TCF7L1	V6.5	GSM307142	2906	0.340538	0.14718	0.213413	0.0905275
1.11583	HDAC1_ChIPSeq	HDAC1	None	GSM1335482	56096	0.692145	0.492716	0.662678	0.635232
1.1107	mES_WT_acH2AZ	H2AZac	CMT1	GSM849929	37755	0.014233	0.050056	0.0401396	0.346159
1.10886	mESC_H3K4me3_CFP1-GFP_rep1_UNT	H3K4me3	Mouse embryonic stem cells	GSM2454371	84528	0.0163416	0.0859171	0.0590875	0.409542
1.10497	Mll34dSET_H3K4me2_1	H3K4me2	Mouse embryonic stem cells	GSM2636036	82235	0.0548234	0.196862	0.161805	0.485798
1.10439	H3K4me3 ChIP-seq in E14 ESC-derived Spinal Motor Neuron lineage cells	H3K4me3	E14	GSM1500753	50486	0.0195045	0.119163	0.0857641	0.468029
1.10432	mESC_H3K4me3_parental_rep1_UNT	H3K4me3	Mouse embryonic stem cells	GSM2454347	88865	0.142857	0.251027	0.268262	0.566811
1.10386	H3K4me3-2	H3K4me3	None	GSM1124779	34098	0.00210859	0.0388495	0.0211917	0.341822
1.10329	RNA Pol2 (8WG16) ChIPseq in mES cells treated with retinoic acid for 8 hours	POLR2A	V6.5	GSM937543	34075	0.0263574	0.0769518	0.0770381	0.412201
1.10114	ESC_H3K4me3_1	H3K4me3	None	GSM1467581	52319	0.0326832	0.0694808	0.0723012	0.391493
1.10096	Tcf3_mES_rep2	TCF7L1	V6.5	GSM307143	2905	0.321033	0.14195	0.199701	0.084511
1.10025	Flag-Jmjd2c_2i_ChIPseq_rep1	KDM4C	None	GSM2460996	73661	0.0542963	0.177064	0.146846	0.493354
1.09694	mmu_wt_H3K27ac_ChIPSeq	H3K27ac	None	GSM1437464	54528	0.139694	0.172581	0.227125	0.416958
1.09585	WT_Mll4_2	KMT2B	None	GSM2630510	85702	0.588297	0.410534	0.595612	0.617742
1.09585	Rbp2 KO_H3K4me3_ChIPSeq	H3K4me3	None	GSM867827	56067	0.0010543	0.0366081	0.0231862	0.366028
1.09499	H4R3me2s_ES	H4R3me2	None	GSM1045500	41193	0.0680021	0.180799	0.180753	0.468728
1.09356	H3K4me3.mESC-UTX+RA.2014_02_01	H3K4me3	None	GSM2035835	68144	0.0537691	0.172208	0.140364	0.499091
1.08857	RYBPfl/fl.YAF2KO_SUZ12_OHT_rep3	SUZ12	None	GSM2192997	71172	0.00632578	0.0896526	0.0453752	0.306003
1.08766	ESC_H33KD1-H32-HA (addback)	H3.2	None	GSM1429926	53217	0.0242488	0.053418	0.0458738	0.346439
1.08489	ChIP-Seq-mES-H3K4me3 EPOP-KO	H3K4me3	None	GSM2027597	72329	0.137059	0.221143	0.237597	0.53421
1.08325	Gata12KO_MES_H3K27ac	H3K27ac	J1	GSM1359843	50204	0.00896152	0.0291371	0.0259287	0.298727
1.08217	WWD_1_H3K4me3_ChIPSeq	H3K4me3	J1	GSM1385047	53163	0.0500791	0.11879	0.10895	0.449279
1.08155	CME211_Klf5_ChIP-seq	KLF5	CGR8	GSM1208218	44342	0.671587	0.479641	0.667913	0.650063
1.08058	Pou5f1/Oct4_ES_Sox17EK-V5 B	POU5F1	KH2	GSM1059863	33755	0.671587	0.453493	0.552481	0.527494
1.07989	RNAPII S5P Repeat ChIPSeq	POLR2A	OS25	GSM850475	5604	0.0716921	0.0859171	0.115433	0.389954
1.07989	Mll2_Mll2KO_MLL2_Y2604A	KMT2D	None	GSM2073028	73264	0.0189773	0.0896526	0.0700573	0.421995
1.07831	WT ES cells, H3K4me3 ChIP	H3K4me3	TC1	GSM928127	8979	0.00474433	0.0511767	0.0368985	0.38002
1.07482	PARP-1KO_ESC_Sox2_ChIPseq_Rep1	SOX2	None	GSM1910641	73469	0.463363	0.225626	0.348292	0.187211
1.07429	RA WT H3K4me3 rep1	H3K4me3	None	GSM1409786	49111	0.000527148	0.078446	0.0426328	0.429411
1.07382	WT_nonTsh_ChIP_H3K4me3_Rep2	H3K4me3	None	GSM2588452	75301	0.00316289	0.0239074	0.0184493	0.324752
1.07308	p300 ChIP-Seq from Tdg fl/fl mouse ES cells, replicate c	EP300	None	GSM1019074	36828	0.536637	0.274561	0.470456	0.255352
1.07102	ESC_H3K4me3_TKO_Rep2	H3K4me3	TKO	GSM2375145	86240	0.00948867	0.0429585	0.0329095	0.335805
1.07096	BRG1fl_OCT4_UNT_rep3 (ChIP-Seq)	POU5F1	None	GSM2341311	75222	0.568793	0.34591	0.41087	0.355954
1.07083	dCD_H3K4me2_ChIPSeq.rep1	H3K4me2	R1	GSM2808670	86673	0.119663	0.294359	0.270257	0.58696
1.06868	Mouse_ESCs_MLL2_FC/FC_H3K4me3	H3K4me3	None	GSM1276698	43404	0.00790722	0.0418379	0.0401396	0.356513
1.06842	H3K4me3_ChIP-Seq_XT67E1_4d-atRA	H3K4me3	XT67E1	GSM397403	2981	0.000527148	0.0104595	0.00598355	0.268784
1.06603	ESC_H3K4me3_rep2	H3K4me3	None	GSM1820139	56873	0.0279389	0.0795667	0.069808	0.420176
1.06455	H3K79me2, Adriamycin	H3K79me2	None	GSM1534641	53429	0.105957	0.143071	0.199202	0.46523
1.06442	BRG1fl_OCT4_UNT_rep2 (ChIP-Seq)	POU5F1	None	GSM2341310	75223	0.483395	0.26186	0.310895	0.187071
1.05995	Mmus E14-WT ChIP RNAPII serum DRB 12h	POLR2A	E14	GSM1399507	48938	0.104375	0.162495	0.179257	0.478522
1.05942	Pou5f1/Oct4_ES_Sox2-V5 A	POU5F1	KH2	GSM1059858	33779	0.828677	0.635039	0.765894	0.789422
1.05702	mESC_H3K4me3_CFP1-GFP_rep2_UNT	H3K4me3	Mouse embryonic stem cells	GSM2454372	84525	0.0790722	0.198356	0.168786	0.53463
1.05363	Atrazine_H3K4me3_ChIPSeq_R1	H3K4me3	R1	GSM1563221	56308	0.00158144	0.0347404	0.0216904	0.340003
1.05268	Pou5f1/Oct4_ES_Sox2KE-V5 B	POU5F1	KH2	GSM1059861	33762	0.405377	0.293612	0.451758	0.587379
1.05259	Sox2_ChIPseq_ZHBTc4-TSC	SOX2	ZhBTc4	GSM1246722	43034	0.0811808	0.129623	0.133882	0.227368
1.05223	WT_H3K4me3_lot1	H3K4me3	None	GSM2537614	76385	0.0780179	0.136347	0.141112	0.461592
1.05176	H3K4me3-AB2-P12-CKO-r1	H3K4me3	R1	GSM1915972	59107	0.00369004	0.0758312	0.0431314	0.424654
1.05162	H2AZ_K3R3 ChIP-Seq	H2AZ	None	GSM1287700	67571	0.198208	0.314158	0.387684	0.6211
1.04684	Mouse_ESCs_MLL1&MLL2_FC/FC_H3K4me3	H3K4me3	None	GSM1276699	43405	0.00263574	0.0183041	0.0167041	0.311599
1.04614	ChIP_dCD_Rad21_rep1	RAD21	None	GSM2870305	85635	0.017923	0.128876	0.0718025	0.386316
1.045	ES cell d0 ATRX ChIP-seq Rep2	ATRX	None	GSM1372576	48658	0.00632578	0.0657452	0.0329095	0.349937
1.04451	Tgif1_ChIPSeq	TGIF1	None	GSM1335481	56095	0.557196	0.403437	0.59636	0.619281
1.04425	Mll4dSET_2i_H3K4me3	H3K4me3	None	GSM2630469	88247	0.00158144	0.0220396	0.012715	0.3102
1.04335	shKdm5b_LSD1i_H3K4me3_mESC_rep1	H3K4me3	R1	GSM1282145	43491	0.017923	0.0870377	0.0640738	0.416818
1.04212	H3K4me3 ChIP-Seq in tet1-/-, biological rep 1	H3K4me3	None	GSM1180193	47368	0.0432261	0.106089	0.105959	0.442703
1.03949	R1a_fS248A_long	SOX2	2TS22C	GSM1704277	77442	0.276226	0.124767	0.175268	0.0814328
1.03776	mmu_ezh2_H3K4me3_ChIPSeq	H3K4me3	None	GSM1437473	54537	0.0369004	0.132238	0.118923	0.462572
1.0377	RA WT H3K4me3 rep2	H3K4me3	None	GSM1409787	49112	0.00158144	0.078446	0.0441286	0.43067
1.03766	H3K4me3-AB2-mESC-Eb5_E_Y-Eb5	H3K4me3	None	GSM2319459	75617	0.14971	0.280164	0.279731	0.56933
1.03432	PolII_Nterm_DMSO1hr_ChIP_Seq	POLR2A	V6.5	GSM515670	2878	0.0332103	0.0519238	0.065819	0.363929
1.03053	H3.3-HA ChIP-seq ES cells 8hr DOX	H3.3	mESC	GSM2345019	88715	0.0806537	0.10721	0.111942	0.397649
1.02933	PolII_Nterm_shControl1_ChIP_Seq	POLR2A	V6.5	GSM515667	2881	0.102794	0.11991	0.1638	0.457954
1.0293	H3K27me3 ChIP-Seq	H3K27me3	V6.5	GSM984546	44008_b	0.10174	0.231229	0.236599	0.494193
1.02903	Pou5f1/Oct4_ES_Sox17-V5 A	POU5F1	KH2	GSM1059864	33790	0.586189	0.400448	0.486911	0.470687
1.02897	Sox17EK_ES ChIP-seq A	SOX17	KH2	GSM1059854	33797	0.449657	0.238326	0.329095	0.177417
1.02613	ChIP-Seq-mES-H3K4me3 Control (For USP7 KO)	H3K4me3	None	GSM2281273	72320	0.0121244	0.0627568	0.0453752	0.397649
1.02501	ChIP-seq RNA PolII DRB [WT]	POLR2A	E14	GSM1873396	74265	0.0469162	0.0597684	0.0720519	0.340842
1.02387	H3K27Ac ChIP-Seq Day2 rtta, rep1	H3K27ac	None	GSM1050312	34550	0.111228	0.188644	0.228621	0.514482
1.02372	H3K4me3_MNase_shGFP	H3K4me3	V6.5	GSM2306659	73281	0.0369004	0.107583	0.0942408	0.449979
1.02351	ESC_GlpKO_H3K4me3	H3K4me3	None	GSM2582424	85747	0.0727464	0.140456	0.129145	0.462572
1.02061	Prdm14_ChIPseq	PRDM14	None	GSM623989	4498	0.722193	0.508778	0.699078	0.506226
1.02007	MLL4dSET_RA_ChIP_H3K4me2	H3K4me2	None	GSM2588390	75326	0.129151	0.280538	0.271254	0.548062
1.0198	H3K4me3.mESC+UTX-RA.2014_05_25	H3K4me3	V6.5	GSM2035840	68139	0.0195045	0.10198	0.0772875	0.432909
1.01935	Chromatin-IP of K4Me3 in Dcr KO	SPI1	None	GSM1334369	48329	0.0226674	0.0986179	0.0735477	0.434728
1.01915	Arid3a OE-High	ARID3A	J1	GSM1370509	48643	0.668951	0.44266	0.612316	0.512803
1.01899	BRG1fl_NANOG_UNT_rep1	NANOG	None	GSM2521520	75200	0.46389	0.258125	0.365246	0.194067
1.01842	Day4_H3K27ac_THF_Rep2	H3K27ac	None	GSM1104454	50949	0.256194	0.285768	0.278484	0.539527
1.0183	mESC_H3K4me3_CFP1-GFP_PCmut_rep1_UNT	H3K4me3	Mouse embryonic stem cells	GSM2454383	87248	0.151292	0.270078	0.272501	0.577865
1.01811	H3K4me3_Mll2WT_vector	H3K4me3	V6.5	GSM2073015	73271	0.0622035	0.151289	0.138868	0.478802
1.01642	ZHBTC4_SOX2_UNT_rep1 (ChIP-Seq)	SOX2	ZhBTc4	GSM2341290	75242	0.591987	0.383638	0.54924	0.374423
1.01639	H3K27Ac_ChIPSeq Day3 Eomes pos. (DVM24)	H3K27ac	Mouse embryonic stem cells	GSM2759420	86802	0.089088	0.156518	0.130391	0.467609
1.01544	mES_H3K4me3_Serum_r1	H3K4me3	KH2	GSM1842759	56001	0.0379547	0.107583	0.0895039	0.424094
1.01412	Mll2_Mll2KO_MLL2WT	KMT2D	None	GSM2073029	73263	0.0353189	0.116175	0.100723	0.456415
1.01398	shLuc_LSD1i_H3K4me3_mESC_rep1	H3K4me3	R1	GSM1282143	43489	0.0506062	0.135226	0.121167	0.466629
1.01397	ESC_Nanog_ChIP-seq	NANOG	None	GSM2417187	73565	0.928308	0.736645	0.882074	0.667833
1.01371	WT_EBD6_ChIP_H3K4me3_3	H3K4me3	None	GSM2779044	83805	0.00158144	0.0683601	0.0311643	0.412901
1.01259	H3K4me3_mHSC_ChIPSeq	H3K4me3	None	GSM721213	3732	0	0.0212925	0.0147095	0.319015
1.01164	Jmjd2c_KD_Nanog	NANOG	None	GSM1059032	41352	0.680021	0.438177	0.604089	0.485798
1.01154	ChIP-seq - mES - Pol II - JQ1 1hr, rep2	POLR2A	None	GSM1865698	67353	0.106484	0.121405	0.135627	0.394011
1.01126	IP_mMot1_replicate2	BTAF1	None	GSM2652712	81947	0.0600949	0.11356	0.0905011	0.409263
1.01021	NPCRingIB_ChIPSeq	RNF2	E14	GSM1295698	43588	0.00790722	0.0515502	0.0316629	0.281517
1.0098	H3K27ac ChIP-Seq in MLL3-/-;MLL4flox/flox D4EB	H3K27ac	None	GSM1220846	61836	0.181339	0.227493	0.252555	0.51742
1.00972	Smad2/3 ChIP-Seq day 3 EB_Trp53+/+_Activin	SMAD2/3	None	GSM1782928	72457	0.223511	0.209936	0.212416	0.442283
1.00658	mESC Fam60a	FAM60A	None	GSM2142337	77370	0.0695836	0.10833	0.1456	0.438646
1.00515	WT_1_H3K4me3_ChIPSeq	H3K4me3	J1	GSM1385046	53162	0.0727464	0.153157	0.137622	0.478243
1.00496	Total_PolII_TRIMKD_rep2	POLR2A	None	GSM1173374	47344	0.0490248	0.0702279	0.0805285	0.363089
1.00396	dCD_H3K4me1_ChIPSeq.rep1	H3K4me1	R1	GSM2808657	86956	0.115445	0.293239	0.262777	0.515741
1.00189	ChIP-seq - mES - WT - Hexim1	HEXIM1	None	GSM1693794	67359	0.046389	0.152409	0.135876	0.471527
1.00142	shMLL2_H3K4me3	H3K4me3	V6.5	GSM1171630	39566	0.0801265	0.0978708	0.123909	0.434448
1.00059	ZHBTC4_NANOG_UNT_rep1 (ChIP-Seq)	NANOG	ZhBTc4	GSM2341296	75236	0.479705	0.277549	0.430317	0.219393
0.998689	Flag-Jmjd2c_2i_ChIPseq_rep2	KDM4C	None	GSM2460997	73660	0.0353189	0.134852	0.0989778	0.451798
0.998656	H3K4me3_mES_rep2	H3K4me3	V6.5	GSM307148	2835	0.0200316	0.0952559	0.0760409	0.436687
0.99811	H3K4me3_Mll2_Y2602A_F4	H3K4me3	None	GSM2073009	73292	0.0268846	0.0780725	0.0802792	0.428711
0.99508	WT_ChIP_H3K4me3_2	H3K4me3	None	GSM2629673	83569	0.0437533	0.089279	0.092745	0.426333
0.9939	Cdk7_mES_r2_ChipSeq	CDK7	V6.5	GSM1463942	49496	0.0311017	0.0444527	0.0508601	0.298447
0.993376	WT_RA_ChIP_MLL2	KMT2D	None	GSM2588427	75310	0.0906695	0.201718	0.187734	0.520778
0.992259	LICR_ChipSeq_ES-Bruce4_H3K4me3	H3K4me3	None	GSM769008	46553	0.154982	0.262234	0.292446	0.575626
0.991871	R1b_fS248A_long	SOX2	2TS22C	GSM1704278	77441	0.263574	0.112813	0.160558	0.0811529
0.991554	mESC_Med1_Bethyl_ChipSeq	MED1	V6.5	GSM1439566	49345	0.522404	0.332088	0.53802	0.548902
0.987979	Mll4KO_FBS_H3K4me2	H3K4me2	None	GSM2630426	87714	0.133896	0.272693	0.254051	0.556597
0.98655	H3K4me3.mESC+UTX+RA.2014_05_25	H3K4me3	V6.5	GSM2035841	68138	0.00158144	0.0735898	0.039641	0.425213
0.986219	H3K4me3-linc1319-PromoterDeletion-141107-C1	H3K4me3	None	GSM2284184	71846	0.102267	0.16511	0.180005	0.484959
0.983809	Total RNA Pol2 ChIP-seq in mES cells with shNelfE with flavopiridol	POLR2A	V6.5	GSM656324	2867	0.0342646	0.0347404	0.0466218	0.261648
0.982728	H3K4me3_Mll2_mCXXC_F4	H3K4me3	None	GSM2073007	73294	0.0395361	0.0866642	0.0855148	0.425633
0.980949	UtxKO H3K4me3	H3K4me3	None	GSM969835	39706	0.0237217	0.0971236	0.0810272	0.440045
0.980894	SclKO_MES_H3K27ac	H3K27ac	J1	GSM1359832	50193	0.0516605	0.128129	0.130641	0.473066
0.980687	mES_H3K4me3_MLL4KD_rpt	H3K4me3	R1	GSM1047959	38617	0.0279389	0.140456	0.104213	0.472226
0.978428	RNA_Pol2_ChIP	POLR2A	HBG3	GSM1346038	48406	0.0010543	0.0369817	0.0169534	0.302924
0.978118	Oct4 ChIP-seq	POU5F1	E14	GSM1587027	52773	0.312599	0.184535	0.207928	0.226529
0.977817	EC-EA-3702-SOX2_MIT_2	SOX2	None	GSM2438475	76346	0.335266	0.137467	0.216654	0.084511
0.977604	PolII_Nterm_shNelfA_ChIP_Seq	POLR2A	V6.5	GSM515668	2880	0.0527148	0.0780725	0.0944902	0.410382
0.975938	WT_SET1Ash_RA_ChIP_H3K4me3_Rep1	H3K4me3	None	GSM2588444	75305	0.0822351	0.172208	0.170032	0.498251
0.975862	Pou5f1/Oct4_ES_Sox2-V5 B	POU5F1	KH2	GSM1059859	33765	0.364259	0.18827	0.26901	0.226529
0.975648	R2b_fS248A_short	SOX2	2TS22C	GSM1704280	77439	0.207696	0.0844229	0.131887	0.0600252
0.975594	PolII_Nterm_Doxycycline12hr_ChIP_Seq	POLR2A	ZhBTc4	GSM515677	2871	0.0695836	0.119537	0.160808	0.458374
0.97459	H3K4me3_J1	H3K4me3	None	GSM2229352	69976	0.1165	0.230482	0.215408	0.540227
0.974406	ChIP-seq of ZFP281 in mESC	ZFP281	V6.5	GSM2044514	73009	0.256194	0.337691	0.394415	0.62152
0.974247	Mll34dSET_H3K4me2_2	H3K4me2	Mouse embryonic stem cells	GSM2636037	82234	0.0437533	0.176317	0.136624	0.476424
0.9742	ChIP-Seq analysis of H3K4me3 in Myc-ESCs Sample 7	H3K4me3	None	GSM2130808	68591	0.0690564	0.180052	0.142608	0.480062
0.97378	Total_PolII_WT_rep2	POLR2A	None	GSM1173372	47342	0.0205588	0.0354875	0.0378958	0.29257
0.973145	ZHBTC4_SOX2_UNT_rep3 (ChIP-Seq)	SOX2	ZhBTc4	GSM2341292	75240	0.39378	0.186029	0.309898	0.150972
0.972605	R1-ESC H3K4me3 ChIPseq	H3K4me3	R1	GSM886518	43937	0.143911	0.259245	0.245076	0.550861
0.970167	ChIP-seq RNA PolII DRB [Dnmt3b KO (cl. B126)]	DNMT3B	E14	GSM1873397	74264	0.0669478	0.0732163	0.0947395	0.351476
0.968916	H3K4me1_ChIP-seq_dCD_rep2	H3K4me1	R1	GSM2586542	75375	0.0680021	0.206948	0.194465	0.437806
0.968268	Suz12 ChIP-seq scramble	SUZ12	None	GSM700554	8829	0.0163416	0.111692	0.0690601	0.356513
0.967213	shGFP_NCAPH2_2	NCAPH2	Mouse embryonic stem cells	GSM2111450	82701	0.00158144	0.021666	0.00847669	0.207779
0.966475	mESC_H3K4me3_EV-GFP_rep2_TAM	H3K4me3	Mouse embryonic stem cells	GSM2454366	88579	0.13495	0.223384	0.244328	0.541626
0.966348	ChIP-seq RNA PolII [Dnmt3b KO (cl. B126)]	DNMT3B	E14	GSM1873395	74266	0.0337375	0.0463205	0.0486163	0.308101
0.965803	WT_AntNPC_ChIP_H3K27ac	H3K27ac	None	GSM2360927	66763	0.160253	0.197609	0.228372	0.512803
0.965651	H3K27Ac ChIP-Seq Day2 TetoBrn2, rep2	H3K27ac	None	GSM1050309	34538	0.0347918	0.0672394	0.0725505	0.349657
0.964865	H3K4me3_Mll2KO_MLL2_Y2604A	H3K4me3	None	GSM2073011	73274	0.0701107	0.100859	0.112939	0.429131
0.963943	ChIP-Seq 500 mESC K4Me3 rep1	H3K4me3	None	GSM1845286	71640	0.056932	0.135973	0.111942	0.405205
0.96297	H3K4me3 ChIP-Seq in MLL3-/-;MLL4flox/flox ESCs	H3K4me3	None	GSM1220836	71732	0.0279389	0.114307	0.0900025	0.451658
0.962587	ES-nonWGA-H3K4me3	H3K4me3	None	GSM936113	36896	0.0664207	0.149795	0.140863	0.479642
0.962487	Otx2_ESC_rep2	OTX2	None	GSM1355157	48490	0.761202	0.549869	0.724508	0.550301
0.961994	E14_Day4_H3K4me2_ChIP-seq	H3K4me2	E14	GSM881361	8881	0.152873	0.248412	0.202693	0.539667
0.961966	ES_H3K4me2	H3K4me2	None	GSM686995	3697	0.0948867	0.212925	0.223136	0.533511
0.961167	ChIP_D2_0_E14_Rad21	RAD21	None	GSM2099821	82626	0.199262	0.289877	0.244328	0.549181
0.961165	CME185_Klf4OE_ChIP-seq	KLF4	CGR8	GSM1324615	44552	0.441223	0.32387	0.488407	0.550861
0.960325	shMLL3_H3K4me3_rep2	H3K4me3	V6.5	GSM1192085	35617	0.0316289	0.0564064	0.0575916	0.387435
0.960224	Replicate_1	H3K64ac	CGR8	GSM1668878	56545	0.108593	0.183788	0.169284	0.423814
0.959626	H3K27Ac_ChIPSeq Day3 Eomes neg. (DVM22)	H3K27ac	Mouse embryonic stem cells	GSM2759418	82620	0.152873	0.201718	0.190726	0.475444
0.959345	H3K4me3_shMll2_1	H3K4me3	V6.5	GSM2073020	73267	0.0790722	0.108704	0.128646	0.443403
0.957649	E14_7d_atRA_H3K4me3	H3K4me3	E14	GSM1276705	43411	0.000527148	0.050056	0.0266766	0.400028
0.957532	H3K27Ac_ChIPSeq Day3 Eomes neg. (DVM04)	H3K27ac	Mouse embryonic stem cells	GSM2759403	86499	0.0353189	0.081808	0.0630765	0.364349
0.956863	H3K27ac rep1	H3K27ac	V6.5	GSM845236	8283	0.151819	0.184535	0.262279	0.497272
0.954031	ChIP_D3_0_DKO_Rad21	RAD21	None	GSM2099853	87434	0.00896152	0.0941352	0.0516081	0.243739
0.950988	WT_ChIP_H3K4me3_1_less	H3K4me3	None	GSM2629672	83570	0.0237217	0.0859171	0.0693094	0.414719
0.950688	MES_H3K27ac	H3K27ac	None	GSM1692787	61871	0.00474433	0.02839	0.0239342	0.297747
0.950679	WT_nonTsh_RA_ChIP_H3K4me3_Rep1	H3K4me3	None	GSM2588457	75299	0.0822351	0.163616	0.161805	0.492235
0.950529	H3K4me3 ChIPseq	H3K4me3	None	GSM2257274	76201	0.0917238	0.187897	0.174769	0.51658
0.950408	H3K4me3_LKOJarid1b	H3K4me3	E14	GSM791785	5466	0.00421719	0.0474412	0.0341561	0.372464
0.950095	Scr-Ring1b	RNF2	E14	GSM1003596	34922	0.0975224	0.147553	0.172526	0.43151
0.94983	Day4_H3K27ac_4OHT_Rep2	H3K27ac	None	GSM1104457	50952	0.203479	0.249533	0.222638	0.514901
0.949046	ESC_Esrrb_ChIP-seq	ESRRB	None	GSM2417188	73564	0.856089	0.640643	0.813014	0.61984
0.94775	H3K4me3-AB2-P0-r1	H3K4me3	R1	GSM1915970	59105	0.00632578	0.0978708	0.057093	0.445082
0.947551	Mll4dNT_2i_H3K4me3	H3K4me3	None	GSM2630448	88473	0.0147601	0.0511767	0.0446273	0.381839
0.946412	dCD_H3K27ac_ChIPSeq.rep1	H3K27ac	R1	GSM2808658	86957	0.103848	0.143444	0.183994	0.446061
0.946338	ChIP-Seq for H3K27ac in ES (129JAE-C57/B6) cells 2	H3K27ac	V6.5	GSM594579	2824	0.178176	0.196862	0.293692	0.515041
0.945299	Day4_H3K27ac_4OHT_Rep1	H3K27ac	None	GSM1104456	50951	0.199262	0.263355	0.230865	0.528473
0.945248	ES-Spt6i-H3K27ac_rep1	H3K27ac	E14Tg2A	GSM2756674	88379	0.0780179	0.140456	0.15258	0.460053
0.94399	shKdm5b_H3K4me3_mESC_rep2	H3K4me3	R1	GSM1282139	43485	0.0716921	0.177811	0.161805	0.492794
0.94231	H3K4Me3_ESKO	H3K4me3	None	GSM1816109	68332	0.135477	0.259619	0.255547	0.562754
0.940533	PolII_Nterm_10058F4_ChIP_Seq	POLR2A	V6.5	GSM515673	2875	0.0722193	0.099365	0.127649	0.426193
0.940511	Nanog-sg3-transient-IP	NANOG	V6.5	GSM1327152	44554	0.151292	0.183788	0.239092	0.453197
0.938971	Sample 47_mettl3_clone2_input	METTL3	None	GSM2424705	77414	0.0253031	0.0933881	0.0860135	0.351616
0.938899	mES-H3K9ac	H3K9ac	E14	GSM775313	33706	0.0416447	0.0795667	0.0934929	0.318735
0.938609	ES_H32_HA_H3K4me3_nChIPSeq	H3K4me3	C6	GSM487548	340	0.0158144	0.0911468	0.0620793	0.423814
0.938505	Nanog ChIP (diploid)	NANOG	None	GSM2123560	73912	0.869267	0.686216	0.849414	0.72366
0.938407	mESC_H3K4me3_CFP1-GFP_rep3_TAM	H3K4me3	Mouse embryonic stem cells	GSM2454379	84520	0.0790722	0.201345	0.183246	0.53519
0.938281	VEGF_minus_6h_H3K4me3_Rep2	H3K4me3	None	GSM2486210	74521	0	0.0302578	0.013463	0.333986
0.937526	NRF1_CHIP_WT_2	NRF1	None	GSM1891642	58923	0.0880337	0.121031	0.146846	0.390514
0.936896	ChIP_D2_5_DKO_Rad21	RAD21	None	GSM2099849	83519	0.032156	0.149421	0.0984792	0.395271
0.936493	FAIRE_ESC	FAIRE	None	GSM1355162	48495	0.298366	0.136347	0.238843	0.178397
0.935556	R-H3K4me3 ChIP	H3K4me3	None	GSM1410331	57719	0.0168687	0.0717221	0.0513588	0.389394
0.935466	p300_plusRNase	EP300	None	GSM1968281	68444	0.429626	0.223758	0.397906	0.231985
0.934047	mESCs Nanog rep2	NANOG	None	GSM1847494	67759	0.790195	0.549496	0.680878	0.483699
0.933548	mESCs Nanog rep1	NANOG	None	GSM1847493	67760	0.647865	0.407919	0.528048	0.346019
0.933448	LICR_ChipSeq_ES-E14_H3K9ac_E0	H3K27ac	E14	GSM1000123	39457	0.00369004	0.0242809	0.0206931	0.31062
0.933264	Tet1-C_shScr	TET1	None	GSM611192	91	0.395888	0.391857	0.514086	0.590178
0.929857	EC-EA-3702-KLF4_MIT_1	KLF4	None	GSM2438468	76353	0.421719	0.297348	0.461232	0.522037
0.929414	ESC_H3K4me3_WT_Rep3	H3K4me3	None	GSM2375149	88156	0.0479705	0.128502	0.117178	0.458234
0.927622	Sox2_ES ChIP-seq_A	SOX2	KH2	GSM1059850	33742	0.512915	0.309675	0.447021	0.29313
0.926507	mESCbulk	H3K4me3	None	GSM1444697	54540	0.0121244	0.104221	0.065819	0.424094
0.925672	mESC_K4me3_solexa	H3K4me3	None	GSM1059001	41321	0.0369004	0.140082	0.121915	0.462572
0.925477	E14_H3K4me3	H3K4me3	E14	GSM1258237	43176	0.0801265	0.171087	0.158813	0.489016
0.925319	Oct4_ESC_rep1	POU5F1	None	GSM1355154	48487	0.897206	0.731416	0.858639	0.801035
0.925054	Utf1_KH2_mES_endogenous_ChIP	UTF1	KH2	GSM1300284	43660	0.0384818	0.11879	0.111444	0.431929
0.924431	RNAPII S5P ChIPSeq	POLR2A	OS25	GSM850467	5596	0.250395	0.204333	0.298679	0.480481
0.922579	Day4_H3K27ac_THF_Rep1	H3K27ac	None	GSM1104453	50948	0.260938	0.294359	0.281975	0.55156
0.92253	ESC_p300_ChIP-Seq	EP300	None	GSM2417169	73581	0.605166	0.398581	0.513338	0.364768
0.922148	ChIP-Seq-mES-H3K4me3 Control (For EloB KO)	H3K4me3	None	GSM2091485	72326	0.0785451	0.169593	0.173772	0.490555
0.92183	mES_Mi-2b	CHD4	V6.5	GSM687284	8276	0.339483	0.177437	0.258539	0.136141
0.921356	Mll4dSET_Mll4	KMT2B	None	GSM2630484	89042	0.482868	0.315278	0.481925	0.55254
0.919939	ES_Dex-_Wild-type_ChIPSeq	GATA4	None	GSM1015514	35370	0.144966	0.221517	0.209424	0.418777
0.918799	ESC_H33KO1-H33-HA (addback)	H3.3	None	GSM1555127	53516	0.419083	0.296227	0.339816	0.236463
0.918482	T_het_H3K27Ac_ChIPseq	H3K27ac	None	GSM2471002	83779	0.0896152	0.1483	0.146846	0.459913
0.917293	mESC_BioJmjd2c_solexa	KDM4C	None	GSM1058996	41316	0.238798	0.345536	0.383944	0.613544
0.916956	R-Foxd3CKO-Tam-H3K27ac ChIP-rep2	H3K27ac	None	GSM1410389	57777	0.403795	0.371685	0.499127	0.62012
0.916405	WT_ChIP_MLL4	KMT2B	None	GSM2588408	77322	0.62098	0.486365	0.655697	0.6905
0.916096	WT_mESC_ChIP_p300	EP300	None	GSM2360934	74540	0.814444	0.663429	0.820244	0.780327
0.915729	TET1-ChIP-in-Sall4KO	TET1	E14	GSM2065705	71071	0.380074	0.384759	0.48018	0.662096
0.91561	Mouse_ESCs_MLL2-/-_7d_atRA_H3K4me3	H3K4me3	None	GSM1276706	43412	0.00316289	0.02839	0.021441	0.354554
0.915588	Halo-Sox2D (Sox2 1 - 120aa)	SOX2	None	GSM1308182	44481	0.323142	0.190885	0.313887	0.300546
0.914656	ZBTB2-GFP_ESC	ZBTB2	None	GSM2716083	83640	0.0701107	0.0952559	0.0762902	0.347418
0.914557	H3K4me3_Mll2KO_vector	H3K4me3	None	GSM2073013	73272	0.0795994	0.10198	0.126901	0.438086
0.91298	coK27ac-K4me3m-Es2i_2	H3K27ac	None	GSM2232475	62321	0.130206	0.18827	0.200698	0.498811
0.912067	Jmjd2c_KD_RNA Pol II_Ser5p	POLR2A	None	GSM1059036	41356	0.158672	0.171834	0.231114	0.468168
0.911986	mES_OCT4_shluc_ctrl_for_H2AZKD	POU5F1	CMTi-1	GSM1047933	38625	0.524512	0.35749	0.42184	0.416398
0.910237	LICR_ChipSeq_ES-Bruce4_Pol2_E0	POLR2A	None	GSM918749	46422	0.0437533	0.0679866	0.0997258	0.393032
0.91018	H3K27Ac-AB2-P14-r1	H3K27ac	R1	GSM1915957	59092	0.00263574	0.0220396	0.0119671	0.282076
0.910009	ChIP-Seq-mES-H3K4me3 EloB-KO	H3K4me3	None	GSM2091486	72325	0.0616763	0.165857	0.15632	0.496152
0.909896	TT2_H3K4me3_10,000	H3K4me3	None	GSM1551534	50834	0.00316289	0.0302578	0.0191972	0.328809
0.909281	Tgif2_ChIPSeq	TGIF2	J1	GSM1606384	56408	0.420664	0.327232	0.45101	0.530153
0.907701	ES_Nanog	NANOG	E14	GSM288345	419	0.364259	0.153157	0.268262	0.105919
0.907474	ES_CTCF_ChIPseq_rep2	CTCF	None	GSM747535	5933	0.039009	0.149421	0.115433	0.264726
0.907288	Smad3 Activin - ESC	SMAD3	V6.5	GSM539542	2892	0.253031	0.0907733	0.182498	0.0600252
0.90673	BRG1fl_SOX2_UNT_rep2 (ChIP-Seq)	SOX2	None	GSM2341316	75217	0.348445	0.184908	0.284218	0.170841
0.905607	H3K27Ac ChIP-Seq Day2 TetoBrn2, rep1	H3K27ac	None	GSM1050307	34523	0.181866	0.235712	0.266766	0.533091
0.905496	Chd4 ChIP replicate 2	CHD4	None	GSM2264177	73910	0.432261	0.30183	0.406881	0.384357
0.905225	EB8-WT_H3K4me1	H3K4me1	None	GSM2282164	70850	0.0158144	0.0313784	0.0291698	0.25871
0.904151	Tet1-N_shScr	TET1	None	GSM611194	89	0.165525	0.203586	0.260534	0.469428
0.902896	Mll4dNT_FBS_H3K4me2	H3K4me2	None	GSM2630456	84664	0.155509	0.272693	0.274744	0.561634
0.901944	KDM5C_ChIP_NPC	KDM5C	None	GSM859662	38065	0.0137059	0.0485618	0.0304164	0.298307
0.901752	MBD3_-_-_ES_H3K27ac	H3K27ac	None	GSM1631261	52947	0.356879	0.315652	0.456495	0.576186
0.901541	WT_ESC_H3K4me3_IP_R2	H3K4me3	None	GSM1954950	59331	0.0832894	0.194247	0.176016	0.513082
0.900774	ES_p300_rep2	EP300	None	GSM2346437	73432	0.747496	0.609264	0.810521	0.789142
0.900444	v5-Dppa2 ChIP-seq in CGR8 Embryonic Stem Cells	DPPA2	CGR8	GSM1400980	53170	0.0685293	0.16399	0.149589	0.435427
0.900127	Total_PolII_TRIMKD_rep1	POLR2A	None	GSM1173373	47343	0.0152873	0.0332462	0.0324109	0.266965
0.899573	H3K27ac ChIP-Seq in WT, biological rep 1	H3K27ac	None	GSM1180181	47356	0.443332	0.325364	0.520568	0.492514
0.898216	RNA Pol II ChIP-Seq	POLR2A	E14	GSM699166	422	0.142857	0.144938	0.215408	0.467469
0.897882	PR2 - Pol2 in mES cells + JQ1 18 hr_ChipSeq	POLR2A	V6.5	GSM937539	34083	0.178176	0.192753	0.24732	0.512103
0.897573	Cfp1null_Dox_H3Ac_1	H3K9ac, H3K14ac	None	GSM1294875	47911	0.0859251	0.154651	0.16006	0.464391
0.897496	p300_ChIPSeq	EP300	R1	GSM558675	2632	0.271481	0.106089	0.22563	0.0857703
0.896512	Otx2_Otx2ko_tetON_Otx2_plusdox	OTX2	None	GSM1355183	48516	0.312599	0.326858	0.384692	0.594795
0.895742	RNA Polymerase II phospho Ser7 CTD ChIPseq in mES cells	POLR2A	V6.5	GSM545205	5756	0.104902	0.109451	0.1638	0.440045
0.895094	ESC_H3K4me3_WT_Rep2	H3K4me3	None	GSM2375148	86235	0.1903	0.268211	0.286213	0.558136
0.894798	NRF1_CHIP_Over_2	NRF1	None	GSM1657385	58294	0.25514	0.304819	0.379207	0.604589
0.894114	ES_H3K4me3_ChIPSeq	H3K4me3	V6.5	GSM307618	3923	0.0147601	0.078446	0.0608327	0.414719
0.893172	v65.h3k27ac	H3K27ac	V6.5	GSM2711417	88063	0.279916	0.183788	0.342309	0.425073
0.893153	H2AZ-AP3-modified ChIP-Seq	H2AZ	V6.5	GSM984545	44007	0.104375	0.193127	0.215158	0.449699
0.893073	ES_H3K4me2 [ChIP-Seq]	H3K4me2	None	GSM632035	6009	0.0948867	0.212925	0.223136	0.533511
0.89219	H3K4me3_shGFP_1	H3K4me3	V6.5	GSM2073017	73270	0.0658935	0.166231	0.150586	0.497412
0.890972	ChIP-seq RNA PolII [WT]	POLR2A	E14	GSM1873394	74267	0.0268846	0.042585	0.0426328	0.316357
0.89085	dCD_H3K4me3_ChIPSeq.rep1	H3K4me3	R1	GSM2808671	86674	0.168687	0.296974	0.302169	0.592556
0.889498	ChIPseq_H3K4me1_2i	H3K4me1	None	GSM1856424	58775	0.268318	0.344042	0.340563	0.409682
0.887887	ZBTB2-GFP_ESC_2i	ZBTB2	None	GSM2716086	83642	0.210859	0.122525	0.210421	0.366168
0.887395	ES_PolII_ChIPseq_rep2	POLR2A	None	GSM747548	5946	0.0585134	0.0874113	0.0890052	0.391213
0.887209	H3.3-HA ChIP-seq ES cells 4hr DOX	H3.3	mESC	GSM2345018	88714	0.104902	0.160254	0.175019	0.455156
0.887007	ESC_G9aKO_H3K4me3	H3K4me3	None	GSM2582427	85746	0.0706378	0.142697	0.138369	0.470407
0.886879	Mof_ChIPSeq 2	KAT8	None	GSM915228	39127	0.111755	0.157639	0.197956	0.420176
