# Supplementary material for: Dynamic regulation of chromatin accessibility by pluripotency transcription factors across the cell cycle
Source: eLife. 2019 Dec 3;8:e50087. doi: 10.7554/eLife.50087 (PMC6890464; doi:10.7554/eLife.50087)
Supplement: Supplementary file 4. — This file contains the oligonucleotide sequences used to perform RT-qPCR experiments. [file elife-50087-supp4.xlsx]

## Sheet: Sheet1
Sequence	Target
TTGTCGCAAAACCTATGTGACC	Rps9 mRNA F
GCCGCCTTACGGATCTTGG	Rps9 mRNA R
GCTCCTCAGCATGACTACTACT	Dlx3 mRNA F
CTGCGAGCCCATTGAGATTG	Dlx3 mRNA R
GGCCCCTATGGCTCAAATTCC	Eomes mRNA F
GAACCACTTCCACGAAAACATTG	Eomes mRNA R
GAAAACGCGGAATCTGAAACAA	Exs1 mRNA F
TCCTGGTAGTTTGCTTCTTCCA	Esx1 mRNA R
AACCAAAGGATGAAGTGCAAGCGG	Nanog mRNA F
TCCAAGTTGGGTTGGTCCAAGTCT	Nanog mRNA R
TTGGCCCCTGTACTCCTGT	Klf5 pre-mRNA F
TATCGGAACTGGAGGGAGCT	Klf5 pre-mRNA R
CTGGCGATTCACAACCCAAA	Klf5 mRNA F
CCCGTATGAGTCCTCAGGTG	Klf5 mRNA R
GAGGTTTGAGAGGCTGTCCC	Lefty2 pre-mRNA F
GTCCCTCACTTCCCAACTCC	Lefty2 pre-mRNA R
CCTGGAGCGCACACAAGT	Lefty2 mRNA F
CAGGTACATCTCCTGGCGAC	Lefty2 mRNA R
ATTCAGGAGGCGTGGCTAAC	Myc pre-mRNA F
GCCTCTTCTCCACAGACACC	Myc pre-mRNA R
GAGCTCCTCGAGCTGTTTGA	Myc mRNA F
GCATCGTCGTGGCTGTCT	Myc mRNA R
CCTATGTGTGCCTGCCTGAA	Rbbp5 pre-mRNA F
CAAGGGTTCCACGGTCTTCA	Rbbp5 pre-mRNA R
TGTAACGATGGCCGGATTGT	Rbbp5 mRNA F
CCTCTGGTCGCAATCTCCTG	Rbbp5 mRNA R
TGTCACTGTCTGCTGCCATA	Fam25c mRNA+pre-mRNA F
CAGCTCTCAACAGACCCAGA	Fam25c mRNA R
CACCACCCTGTCTCCTGATT	Fam25c pre-mRNA R
ACAATTCCCGATGCAACCCT	Esrrb pre-mRNA F
CGGGCAGTTGTACTCGATGT	Esrrb pre-mRNA R
CCGATTTCCCCACCTGCTAA	Esrrb mRNA F
GGCCCAGTTGATGAGGAACA	Esrrb mRNA R
CCCGCAGATTCAGTCGACTT	Steap2 pre-mRNA F
GGCTGACGACAAAGATCCCA	Steap2 pre-mRNA R
TCCCGGACTCCTTGATTGTC	Steap2 mRNA F
AATCTCCTTGGCTGACGACA	Steap2 mRNA R
ACAAAGACCTCTCTCTGGCG	Trps1 pre-mRNA F
GTACTACCCAGCCCTGCAAA	Trps1 pre-mRNA R
TGCCTGACCACAAAGACCTC	Trps1 mRNA F
TAAGGCGCTTTCTTGTCCGT	Trps1 mRNA R
ACTACTTGATCGTCGCCCTG	Jam2 pre-mRNA F
GCCTGCCCTCATCCAGATTA	Jam2 pre-mRNA R
CGGAACTCTGTCGGACACC	Jam2 mRNA F
AACTGGTTTTGGTGCAGCTC	Jam2 mRNA R
TCCACTCCCTTTTCCAACACT	Terf1 pre-mRNA F
ACTGTCCTTGAGATAACACGTGT	Terf1 pre-mRNA R
TGGCAGCTTTAAGGAAGCAGA	Terf1 mRNA F
TGGAAAAGGGAGTGGAACACA	Terf1 mRNA R
GCTAGAGGAGGCTGAGGAGA	Myh13 pre-mRNA F
GAAGGCACCAAAAGGCATCC	Myh13 pre-mRNA R
CTTTGGAAACGCCAAGACCG	Myh13 mRNA F
GGCTCCAAAGTGGATCCGAA	Myh13 mRNA R
AGCCCGAACACTACAACCAG	Tfcp2l1 pre-mRNA F
TGGAGGCCTGAGGTTAGTCA	Tfcp2l1 pre-mRNA R
ATCAGCACGGAATTCACCCC	Tfcp2l1 mRNA F
TCTGTTTCCGATCAGCTCCC	Tfcp2l1 mRNA R
GGCAGCAGATCTTTTCCCCT	Fbxo22 pre-mRNA F
GAGGAGAACTGTGGCACTCT	Fbxo22 pre-mRNA R
AGGGAGTGTGTACGCAGAGTG	Fbxo22 mRNA F
CGACACTCTTCCAGGCTGATG	Fbxo22 mRNA R
GGACCGCTACGAGGACAG	Msc mRNA+pre-mRNA F
CCAGAAACCTCCCCTCTTGG	Msc pre-mRNA R
CCCAGTCCTTTGCGTTTACC	Msc mRNA R
GCCAGGAGAACGCGAGAG	Ruvbl1 pre-mRNA F
TCTAATTTGCGTGCCGTGAC	Ruvbl1 pre-mRNA R
TCGCCCCCATTGTCATCTTT	Ruvbl1 mRNA F
TGCCGTGTGGAGAAGTGATG	Ruvbl1 mRNA R
TTCGGGAGAGGATGTGAGAC	Insr pre-mRNA F
ACTCAGCCCAAAGGGAGAAT	Insr pre-mRNA R
CTGTGTCTCCCGGAAGCATT	Insr mRNA F
TTTGGCAATATTTGATGGGACATCT	Insr mRNA R
AGAGTCGCTTAGAGGTGCAG	Nes pre-mRNA F
CGTGTTGGTGACCCTCCTC	Nes pre-mRNA R
GTCAGATCGCTCAGATCCTGG	Nes mRNA F
GTGTCTGCAAGCGAGAGTTC	Nes mRNA R
CTGTCGCTCCTGTCGCCA	Cntln pre-mRNA F
CGGCGGCCAGTCCTGATA	Cntln pre-mRNA R
GGGAGGATGTGAGTGAAGGC	Cntln mRNA F
ACAGCTGCCTTCTGTTTGGT	Cntln mRNA R
GGCTACTTCTACGTTGGGCT	Agrn pre-mRNA F
ATACCCACAAGCAAAAGCCG	Agrn pre-mRNA R
TGCCATCTGAAGAAGGCCAG	Agrn mRNA F
AGGCCATAGGTAGCAGTGGA	Agrn mRNA R
TTGAACCAGCGACAGTCTCA	Mllt10 pre-mRNA F
GCGAGTTCTGGCCATTTTCA	Mllt10 pre-mRNA R
ACTCCAGTCACAATCTCCCAG	Mllt10 mRNA F
GCGAGTTCTGGCCATTTTCA	Mllt10 mRNA R
TCGTGGCGTAGTCTGTGATC	Smyd3 pre-mRNA F
TTCCCCTTCATCTGCACCAC	Smyd3 pre-mRNA R
GATGGAGGCACTGAAGGTGG	Smyd3 mRNA F
CGGCATTGAGAACAACGCAT	Smyd3 mRNA R
TGTTGCCCAAGAGAGTCCAA	Ticrr pre-mRNA F
ATTCTGGGTCTGTGGCACTT	Ticrr pre-mRNA R
AAACAGCTGCGACTGAAGGT	Ticrr mRNA F
CTGGACCCACTCTGGAACAC	Ticrr mRNA R
