# Supplementary material for: Dynamic regulation of chromatin accessibility by pluripotency transcription factors across the cell cycle
Source: eLife. 2019 Dec 3;8:e50087. doi: 10.7554/eLife.50087 (PMC6890464; doi:10.7554/eLife.50087)
Supplement: Supplementary file 5. — This file contains descriptions of publicly available raw data that were aligned and processed according to the Materials and methods section as well as publicly available pre-processed data used in the study. [file elife-50087-supp5.xlsx]

## Sheet: Raw_data
Experiment	Cell line	Condition	Antibody	Replicate	Accession	SRA	SRA	SRA	SRA
ATAC	ZHBTc4	UNT	-	1	GSE87822	SRR44137754	SRR4413775	SRR4413776	SRR4413777
ATAC	ZHBTc4	DOX	-	1	GSE87822	SRR4413786	SRR4413787	SRR4413788	SRR4413789
ATAC	ZHBTc4	UNT	-	2	GSE87822	SRR4413778	SRR4413779	SRR4413780	SRR4413781
ATAC	ZHBTc4	DOX	-	2	GSE87822	SRR4413790	SRR4413791	SRR4413792	SRR4413793
ATAC	ZHBTc4	UNT	-	3	GSE87822	SRR4413782	SRR4413783	SRR4413784	SRR4413785
ATAC	ZHBTc4	DOX	-	3	GSE87822	SRR4413794	SRR4413795	SRR4413796	SRR4413797
ChIP	ZHBTc4	UNT	BRG1	1	GSE87822	SRR4413872	SRR4413873
ChIP	ZHBTc4	DOX	BRG1	1	GSE87822	SRR4413878	SRR4413879
ChIP	ZHBTc4	UNT	BRG1	2	GSE87822	SRR4413874	SRR4413875
ChIP	ZHBTc4	DOX	BRG1	2	GSE87822	SRR4413880	SRR4413881
ChIP	ZHBTc4	UNT	BRG1	3	GSE87822	SRR4413876	SRR4413877
ChIP	ZHBTc4	DOX	BRG1	3	GSE87822	SRR4413882	SRR4413883
ChIP	ZHBTc4	UNT	SOX2	1	GSE87822	SRR4413848	SRR4413849
ChIP	ZHBTc4	DOX	SOX2	1	GSE87822	SRR4413854	SRR4413855
ChIP	ZHBTc4	UNT	SOX2	2	GSE87822	SRR4413850	SRR4413851
ChIP	ZHBTc4	DOX	SOX2	2	GSE87822	SRR4413856	SRR4413857
ChIP	ZHBTc4	UNT	SOX2	3	GSE87822	SRR4413852	SRR4413853
ChIP	ZHBTc4	DOX	SOX2	3	GSE87822	SRR4413859	SRR4413859
ChIP	ZHBTc4	UNT	OCT4	1	GSE87822	SRR4413836	SRR4413837
ChIP	ZHBTc4	DOX	OCT4	1	GSE87822	SRR4413842	SRR4413843
ChIP	ZHBTc4	UNT	OCT4	2	GSE87822	SRR4413838	SRR4413839
ChIP	ZHBTc4	DOX	OCT4	2	GSE87822	SRR4413844	SRR4413845
ChIP	ZHBTc4	UNT	OCT4	3	GSE87822	SRR4413840	SRR4413841
ChIP	ZHBTc4	DOX	OCT4	3	GSE87822	SRR4413846	SRR4413847
ChIP	ZHBTc4	UNT	Input	1	GSE87822	SRR4413884	SRR4413885
ATAC	SBROS	SHOH	-	1	GSE126554	SRR8573769
ATAC	SBROS	SHOH	-	2	GSE126554	SRR8573770
ATAC	SBROS	SHOH	-	3	GSE126554	SRR8573771
ATAC	SBROS	SHOL	-	1	GSE126554	SRR8573772
ATAC	SBROS	SHOL	-	2	GSE126554	SRR8573773
ATAC	SBROS	SHOL	-	3	GSE126554	SRR8573774
ATAC	SBROS	SLOH	-	1	GSE126554	SRR8573775
ATAC	SBROS	SLOH	-	2	GSE126554	SRR8573776
ATAC	SBROS	SLOH	-	3	GSE126554	SRR8573777
ATAC	SBROS	SLOL	-	1	GSE126554	SRR8573778
ATAC	SBROS	SLOL	-	2	GSE126554	SRR8573779
ATAC	SBROS	SLOL	-	3	GSE126554	SRR8573780

## Sheet: Processed_data
Accession	Sample number	Sample/file name	Factor	Cell line	Source
GSE49848	GSM1208217	CME186_KLF4_CHIP-SEQ	KLF4	ESC	cistromeDB
GSE49848	GSM1208218	CME211_Klf5_ChIP-seq	KLF5	ESC	cistromeDB
GSE57700	GSM2065694	SALL4-CHIP-IN-WT-OF-SALL-DKO	SALL4	ESC	cistromeDB
GSE113915	GSM3123484	WT MESC NANOG	NANOG	ESC	cistromeDB
GSE90895	GSM2417188	ESC_ESRRB_CHIP-SEQ	ESRRB	ESC	cistromeDB
GSE99022	GSM2630490	WT_2I_H3K4ME3	H3K4me3	ESC	cistromeDB
GSE95781	GSM2636047	WT_H3K4ME1	H3K4me1	ESC	cistromeDB
GSE72886	GSM1874094	MESC_H3K27AC_CHIPSEQ	H3K27ac	ESC	cistromeDB
GSE80280	GSM2264180	Mbd3 ChIP replicate 2	MBD3	ESC	cistromeDB
GSE80280	GSM2264178	Chd4 ChIP replicate 3	CHD4	ESC	cistromeDB
GSE19219	GSM476146	Tbx3_ChIPSeq	TBX3	ESC	cistromeDB
GSE48666	GSM1183116	bioDax1_R1	DAX1	ESC	cistromeDB
GSE89599	GSM2385224	ASYNCHRONOUS CHIP 1	SOX2	ESC	cistromeDB
GSE90994	GSM2418859	WT_Rad21_ChIPSeq	RAD21	ESC	cistromeDB
GSE90994	GSM2418860	WT_CTCF_ChIPSeq	CTCF	ESC	cistromeDB
GSE111824	GSM3398593	WTTS_ATAC_rep1	ATAC	TSC	GEO
GSE51511	GSM1246722	Sox2_ChIPseq_ZHBTc4-TSC	SOX2	TSC	GEO
GSE74112	GSM1910641	PARP-1KO_ESC_Sox2_ChIPseq_Rep1	SOX2	ESC_PARP1KO	GEO
GSE74112	GSM1910640	WT_ESC_Sox2_ChIPseq_Rep1	SOX2	ESC	GEO
GSE87819		GSE87819_mESC_BRG1fl_ATAC_72hrTAM_MERGED.DANPOS.bgsub.smooth	ATAC	ESC_BRG1fl	GEO
GSE87819		GSE87819_mESC_BRG1fl_ATAC_UNT_MERGED.DANPOS.bgsub.smooth	ATAC	ESC_BRG1fl	GEO
GSE87821		GSE87821_ZHBTC4.nucRNAseq.DESeq2_Results	RNA-seq	ZHBTc4	GEO
GSE89599		GSE89599_peaks_Asynchronous_ChIP_vs_Input_3rep_qval001_notInBlacklist	SOX2	E14	GEO
